# Supplementary material for: Transcriptome Analysis Reveals Genes and Pathways Associated with Salt Tolerance during Seed Germination in Suaeda liaotungensis
Source: Int J Mol Sci. 2022 Oct 13;23(20):12229. doi: 10.3390/ijms232012229 (PMC9603052; doi:10.3390/ijms232012229)
Supplement: Supplementary file 1 [file ijms-23-12229-s001.zip › Supplementary Tables S1-S9.xlsx]

## Sheet: Table S1
Table S1. Statistics of output sequencing in Suaeda liaotungensis.
Note: GC, is short for guanine-cytosine.
Total number	Total base	Largest length (bp)	Smallest length (bp)	N50 length (bp)	E90N50 length (bp)	GC percent (%)
90665	74545292	17370	201	1517	3031	39.08

## Sheet: Table S2
Table S2. Statistics of sequencing and assembly data.
Mapped ratio (%): Mapped reads/Clean reads.
Sample	Clean reads	Mapped reads	Mapped ratio
SlD1	42625378	34342488	0.8057
SlD2	40923760	32693622	0.7989
SlD3	42808378	34191686	0.7987
SlG_C1	48320916	38582616	0.7985
SlG_C2	48955254	39830790	0.8136
SlG_C3	52479616	41548128	0.7917
SlG_N1	47390332	37719248	0.7959
SlG_N2	45473060	36655122	0.8061
SlG_N3	47861198	38558748	0.8056

## Sheet: Table S3
Table S3. GO enrichment analysis in the SlD vs SlG_C and SlG_C vs SlG_N groups.
BP: biological process, CC: cellular component, MF: molecular function. Padj-value<0.05.
GO ID	Term Type	Description	Number	Ratio_in_study	Ratio_in_pop	P-value	Padj-value
GO enrichment pathway in the SlD vs SlG_C group
GO:0005975	BP	carbohydrate metabolic process	404	404/6504	1457/27189	0.00057566	0.0172485
GO:0006629	BP	lipid metabolic process	294	294/6504	1043/27189	0.0012688	0.031011
GO:0006355	BP	regulation of transcription, DNA-templated	234	234/6504	810/27189	0.000947778	0.0248946
GO:1903506	BP	regulation of nucleic acid-templated transcription	234	234/6504	810/27189	0.000947778	0.0248946
GO:2001141	BP	regulation of RNA biosynthetic process	234	234/6504	810/27189	0.000947778	0.0248946
GO:0007165	BP	signal transduction	207	207/6504	714/27189	0.00158394	0.0357936
GO:0044262	BP	cellular carbohydrate metabolic process	133	133/6504	388/27189	6.27041e-06	0.000485158
GO:0005976	BP	polysaccharide metabolic process	129	129/6504	355/27189	3.10239e-06	0.000485158
GO:0071554	BP	cell wall organization or biogenesis	112	112/6504	279/27189	2.67793e-06	0.000485158
GO:0045229	BP	external encapsulating structure organization	95	95/6504	251/27189	3.32211e-06	0.000485158
GO:0071555	BP	cell wall organization	93	93/6504	241/27189	3.05535e-06	0.000485158
GO:0044264	BP	cellular polysaccharide metabolic process	93	93/6504	247/27189	4.09699e-06	0.000485158
GO:0044042	BP	glucan metabolic process	73	73/6504	205/27189	0.000195384	0.00681317
GO:0006073	BP	cellular glucan metabolic process	70	70/6504	201/27189	0.000463568	0.0146006
GO:0072593	BP	reactive oxygen species metabolic process	69	69/6504	195/27189	0.000366612	0.0120077
GO:0044036	BP	cell wall macromolecule metabolic process	66	66/6504	122/27189	1.97057e-06	0.000485158
GO:0030001	BP	metal ion transport	66	66/6504	163/27189	3.00254e-06	0.000485158
GO:0009755	BP	hormone-mediated signaling pathway	66	66/6504	182/27189	0.000223307	0.0076226
GO:0000272	BP	polysaccharide catabolic process	60	60/6504	155/27189	4.09552e-05	0.00165664
GO:0042744	BP	hydrogen peroxide catabolic process	58	58/6504	153/27189	0.000122917	0.00447925
GO:0042743	BP	hydrogen peroxide metabolic process	58	58/6504	155/27189	0.00020063	0.0069363
GO:0008643	BP	carbohydrate transport	53	53/6504	136/27189	0.000106591	0.00397382
GO:0010383	BP	cell wall polysaccharide metabolic process	51	51/6504	91/27189	1.46623e-06	0.000485158
GO:0010410	BP	hemicellulose metabolic process	49	49/6504	85/27189	1.17668e-06	0.000485158
GO:0042546	BP	cell wall biogenesis	48	48/6504	91/27189	1.46623e-06	0.000485158
GO:0071669	BP	plant-type cell wall organization or biogenesis	42	42/6504	94/27189	1.46188e-05	0.000689
GO:0010411	BP	xyloglucan metabolic process	28	28/6504	46/27189	4.79216e-07	0.000485158
GO:0009832	BP	plant-type cell wall biogenesis	24	24/6504	48/27189	0.000110036	0.00408344
GO:0045491	BP	xylan metabolic process	23	23/6504	41/27189	9.69024e-06	0.000612439
GO:0009738	BP	abscisic acid-activated signaling pathway	23	23/6504	43/27189	3.53402e-05	0.00145868
GO:0009698	BP	phenylpropanoid metabolic process	22	22/6504	47/27189	0.000826048	0.0226533
GO:0042545	BP	cell wall modification	22	22/6504	49/27189	0.00122199	0.0303248
GO:0009834	BP	plant-type secondary cell wall biogenesis	20	20/6504	27/27189	4.40382e-07	0.000485158
GO:0016998	BP	cell wall macromolecule catabolic process	20	20/6504	41/27189	0.000648613	0.0187403
GO:0070589	BP	cellular component macromolecule biosynthetic process	19	19/6504	37/27189	0.000316266	0.0105292
GO:0044038	BP	cell wall macromolecule biosynthetic process	19	19/6504	37/27189	0.000316266	0.0105292
GO:0009808	BP	lignin metabolic process	19	19/6504	37/27189	0.000316266	0.0105292
GO:0070592	BP	cell wall polysaccharide biosynthetic process	18	18/6504	29/27189	1.35074e-05	0.000677104
GO:0009699	BP	phenylpropanoid biosynthetic process	17	17/6504	30/27189	0.000119603	0.00439814
GO:0045492	BP	xylan biosynthetic process	15	15/6504	19/27189	6.69012e-07	0.000485158
GO:0009809	BP	lignin biosynthetic process	14	14/6504	21/27189	3.98724e-05	0.00162913
GO:0010200	BP	response to chitin	11	11/6504	19/27189	0.00155083	0.0354413
GO:0051103	BP	DNA ligation involved in DNA repair	9	9/6504	14/27189	0.00153556	0.0351918
GO:0032103	BP	positive regulation of response to external stimulus	9	9/6504	14/27189	0.00153556	0.0351918
GO:0031349	BP	positive regulation of defense response	9	9/6504	14/27189	0.00153556	0.0351918
GO:0002833	BP	positive regulation of response to biotic stimulus	9	9/6504	14/27189	0.00153556	0.0351918
GO:0006266	BP	DNA ligation	9	9/6504	14/27189	0.00153556	0.0351918
GO:0002684	BP	positive regulation of immune system process	8	8/6504	12/27189	0.00204661	0.0443889
GO:0050778	BP	positive regulation of immune response	8	8/6504	12/27189	0.00204661	0.0443889
GO:0045089	BP	positive regulation of innate immune response	8	8/6504	12/27189	0.00204661	0.0443889
GO:0006097	BP	glyoxylate cycle	7	7/6504	9/27189	0.00100791	0.0258038
GO:0010417	BP	glucuronoxylan biosynthetic process	6	6/6504	6/27189	0.000187052	0.00657934
GO:0010413	BP	glucuronoxylan metabolic process	6	6/6504	6/27189	0.000187052	0.00657934
GO:0031224	CC	intrinsic component of membrane	2432	2432/6504	8667/27189	1.47379e-05	0.000689
GO:0016021	CC	integral component of membrane	2419	2419/6504	8641/27189	1.44977e-05	0.000689
GO:0005886	CC	plasma membrane	328	328/6504	1167/27189	0.000753902	0.0210313
GO:0005576	CC	extracellular region	200	200/6504	513/27189	3.91278e-06	0.000485158
GO:0005618	CC	cell wall	103	103/6504	294/27189	1.79586e-05	0.00080081
GO:0030312	CC	external encapsulating structure	103	103/6504	294/27189	1.79586e-05	0.00080081
GO:0031226	CC	intrinsic component of plasma membrane	80	80/6504	208/27189	3.86965e-06	0.000485158
GO:0048046	CC	apoplast	69	69/6504	200/27189	0.000815242	0.0224851
GO:0031225	CC	anchored component of membrane	30	30/6504	70/27189	0.000599605	0.0177037
GO:0046658	CC	anchored component of plasma membrane	28	28/6504	53/27189	5.71381e-06	0.000485158
GO:0016491	MF	oxidoreductase activity	833	833/6504	3165/27189	0.000882616	0.0237221
GO:0022857	MF	transmembrane transporter activity	505	505/6504	1868/27189	0.0012272	0.0303611
GO:0003677	MF	DNA binding	495	495/6504	1770/27189	5.40591e-05	0.00213762
GO:0016757	MF	transferase activity, transferring glycosyl groups	243	243/6504	788/27189	1.21579e-05	0.000634563
GO:0016798	MF	hydrolase activity, acting on glycosyl bonds	228	228/6504	677/27189	4.7317e-06	0.000485158
GO:0004553	MF	hydrolase activity, hydrolyzing O-glycosyl compounds	218	218/6504	640/27189	4.02009e-06	0.000485158
GO:0140110	MF	transcription regulator activity	195	195/6504	579/27189	4.29749e-06	0.000485158
GO:0046906	MF	tetrapyrrole binding	183	183/6504	617/27189	0.000971968	0.0252253
GO:0003700	MF	DNA-binding transcription factor activity	178	178/6504	494/27189	4.29849e-06	0.000485158
GO:0020037	MF	heme binding	169	169/6504	549/27189	0.000217494	0.00745561
GO:0016705	MF	oxidoreductase activity, acting on paired donors, with incorporation or reduction of molecular oxygen	165	165/6504	544/27189	0.000545859	0.0166064
GO:0043565	MF	sequence-specific DNA binding	145	145/6504	422/27189	3.74675e-06	0.000485158
GO:0015291	MF	secondary active transmembrane transporter activity	131	131/6504	399/27189	5.41672e-05	0.00213762
GO:0016747	MF	transferase activity, transferring acyl groups other than amino-acyl groups	130	130/6504	422/27189	0.00124431	0.0306905
GO:0003690	MF	double-stranded DNA binding	99	99/6504	304/27189	0.000551023	0.0166958
GO:0016684	MF	oxidoreductase activity, acting on peroxide as acceptor	83	83/6504	246/27189	0.000518861	0.0159604
GO:0004601	MF	peroxidase activity	81	81/6504	239/27189	0.000443082	0.0141123
GO:1990837	MF	sequence-specific double-stranded DNA binding	80	80/6504	211/27189	6.73729e-06	0.00048863
GO:0060089	MF	molecular transducer activity	73	73/6504	158/27189	2.03249e-06	0.000485158
GO:0038023	MF	signaling receptor activity	72	72/6504	149/27189	2.66821e-06	0.000485158
GO:0000976	MF	transcription regulatory region sequence-specific DNA binding	67	67/6504	166/27189	3.74818e-06	0.000485158
GO:0001067	MF	regulatory region nucleic acid binding	67	67/6504	166/27189	3.74818e-06	0.000485158
GO:0004857	MF	enzyme inhibitor activity	61	61/6504	144/27189	2.86934e-06	0.000485158
GO:0004888	MF	transmembrane signaling receptor activity	47	47/6504	100/27189	1.46925e-06	0.000485158
GO:0004675	MF	transmembrane receptor protein serine/threonine kinase activity	43	43/6504	94/27189	4.30937e-06	0.000485158
GO:0019199	MF	transmembrane receptor protein kinase activity	43	43/6504	94/27189	4.30937e-06	0.000485158
GO:0004185	MF	serine-type carboxypeptidase activity	34	34/6504	85/27189	0.00124915	0.0307163
GO:0000977	MF	RNA polymerase II transcription regulatory region sequence-specific DNA binding	27	27/6504	62/27189	0.000817135	0.0224851
GO:0008146	MF	sulfotransferase activity	25	25/6504	40/27189	1.1903e-06	0.000485158
GO:0061135	MF	endopeptidase regulator activity	25	25/6504	54/27189	0.000327707	0.010777
GO:0061134	MF	peptidase regulator activity	25	25/6504	55/27189	0.000664669	0.0191358
GO:0030414	MF	peptidase inhibitor activity	24	24/6504	52/27189	0.00047046	0.0146951
GO:0004866	MF	endopeptidase inhibitor activity	24	24/6504	52/27189	0.00047046	0.0146951
GO:0016762	MF	xyloglucan:xyloglucosyl transferase activity	23	23/6504	40/27189	5.49898e-06	0.000485158
GO:0045735	MF	nutrient reservoir activity	23	23/6504	53/27189	0.00184451	0.0409947
GO:0016682	MF	oxidoreductase activity, acting on diphenols and related substances as donors, oxygen as acceptor	20	20/6504	42/27189	0.000830096	0.0226726
GO:0008061	MF	chitin binding	19	19/6504	34/27189	6.19698e-05	0.00241027
GO:0043178	MF	alcohol binding	18	18/6504	30/27189	2.62071e-05	0.00111587
GO:0004568	MF	chitinase activity	17	17/6504	33/27189	0.000668361	0.0191627
GO:0032440	MF	2-alkenal reductase [NAD(P)+] activity	17	17/6504	35/27189	0.00212694	0.0457631
GO:0000987	MF	cis-regulatory region sequence-specific DNA binding	17	17/6504	35/27189	0.00212694	0.0457631
GO:0016413	MF	O-acetyltransferase activity	16	16/6504	32/27189	0.00136463	0.0331526
GO:0010427	MF	abscisic acid binding	15	15/6504	22/27189	1.3832e-05	0.000677413
GO:0042562	MF	hormone binding	15	15/6504	23/27189	3.09394e-05	0.00129689
GO:0019840	MF	isoprenoid binding	15	15/6504	23/27189	3.09394e-05	0.00129689
GO:0004864	MF	protein phosphatase inhibitor activity	15	15/6504	29/27189	0.00145342	0.0346289
GO:0019212	MF	phosphatase inhibitor activity	15	15/6504	29/27189	0.00145342	0.0346289
GO:0033897	MF	ribonuclease T2 activity	12	12/6504	17/27189	6.23465e-05	0.00241332
GO:0016892	MF	endoribonuclease activity, producing 3'-phosphomonoesters	12	12/6504	19/27189	0.00031019	0.010456
GO:0004564	MF	beta-fructofuranosidase activity	10	10/6504	14/27189	0.000230294	0.00779531
GO:0045551	MF	cinnamyl-alcohol dehydrogenase activity	9	9/6504	14/27189	0.00153556	0.0351918
GO:0022839	MF	ion gated channel activity	7	7/6504	9/27189	0.00100791	0.0258038
GO:0005227	MF	calcium activated cation channel activity	7	7/6504	9/27189	0.00100791	0.0258038
GO enrichment pathway in the SlG_C vs SlG_N group
GO:0005975	BP	carbohydrate metabolic process	55	55/462	1643/27189	4.1542e-06	0.000838156
GO:0009056	BP	catabolic process	49	49/462	1622/27189	9.54348e-05	0.00733474
GO:0044248	BP	cellular catabolic process	36	36/462	1134/27189	0.000358742	0.0234233
GO:0044712	BP	single-organism catabolic process	33	33/462	832/27189	7.49531e-06	0.00122847
GO:0071554	BP	cell wall organization or biogenesis	21	21/462	279/27189	3.65833e-07	0.000776239
GO:0005976	BP	polysaccharide metabolic process	19	19/462	354/27189	1.2035e-05	0.0016451
GO:0071555	BP	cell wall organization	18	18/462	241/27189	9.25532e-07	0.000776239
GO:0045229	BP	external encapsulating structure organization	18	18/462	251/27189	1.6198e-06	0.000838156
GO:0006979	BP	response to oxidative stress	17	17/462	322/27189	4.22095e-05	0.00429094
GO:0072593	BP	reactive oxygen species metabolic process	16	16/462	195/27189	1.37594e-06	0.000789298
GO:0042744	BP	hydrogen peroxide catabolic process	15	15/462	153/27189	3.83896e-07	0.000776239
GO:0042743	BP	hydrogen peroxide metabolic process	15	15/462	155/27189	4.50129e-07	0.000776239
GO:0044036	BP	cell wall macromolecule metabolic process	13	13/462	122/27189	1.2067e-06	0.000776239
GO:0010410	BP	hemicellulose metabolic process	10	10/462	85/27189	1.82691e-06	0.000838156
GO:0010383	BP	cell wall polysaccharide metabolic process	10	10/462	90/27189	3.09689e-06	0.000838156
GO:0000272	BP	polysaccharide catabolic process	10	10/462	154/27189	0.000317149	0.0210498
GO:0042546	BP	cell wall biogenesis	9	9/462	91/27189	2.49803e-05	0.00274817
GO:0019748	BP	secondary metabolic process	7	7/462	80/27189	0.000426733	0.0274167
GO:0006857	BP	oligopeptide transport	6	6/462	39/27189	4.72622e-05	0.00454355
GO:0015833	BP	peptide transport	6	6/462	42/27189	7.27903e-05	0.00608936
GO:0010411	BP	xyloglucan metabolic process	6	6/462	46/27189	0.000122735	0.00896078
GO:0009698	BP	phenylpropanoid metabolic process	6	6/462	47/27189	0.000138697	0.00977082
GO:0042886	BP	amide transport	6	6/462	55/27189	0.000333996	0.0219863
GO:0009808	BP	lignin metabolic process	5	5/462	37/27189	0.000385894	0.0249929
GO:0046274	BP	lignin catabolic process	4	4/462	14/27189	7.19587e-05	0.00608316
GO:0046271	BP	phenylpropanoid catabolic process	4	4/462	14/27189	7.19587e-05	0.00608316
GO:0035672	BP	oligopeptide transmembrane transport	4	4/462	15/27189	9.68102e-05	0.00733474
GO:0035442	BP	dipeptide transmembrane transport	4	4/462	15/27189	9.68102e-05	0.00733474
GO:0042938	BP	dipeptide transport	4	4/462	15/27189	9.68102e-05	0.00733474
GO:0019740	BP	nitrogen utilization	3	3/462	5/27189	4.75231e-05	0.00454355
GO:0090379	BP	secondary cell wall biogenesis involved in seed trichome differentiation	2	2/462	3/27189	0.000854608	0.0493767
GO:0005576	CC	extracellular region	41	41/462	513/27189	9.03861e-07	0.000776239
GO:0005618	CC	cell wall	18	18/462	294/27189	3.37697e-06	0.000838156
GO:0030312	CC	external encapsulating structure	18	18/462	294/27189	3.37697e-06	0.000838156
GO:0044459	CC	plasma membrane part	15	15/462	288/27189	0.000136788	0.0097216
GO:0031226	CC	intrinsic component of plasma membrane	14	14/462	208/27189	1.43217e-05	0.00182568
GO:0005887	CC	integral component of plasma membrane	13	13/462	155/27189	2.66697e-06	0.000838156
GO:0048046	CC	apoplast	13	13/462	200/27189	4.14583e-05	0.00426861
GO:0098589	CC	membrane region	6	6/462	39/27189	4.72622e-05	0.00454355
GO:0098590	CC	plasma membrane region	5	5/462	32/27189	0.000191151	0.0130096
GO:0031520	CC	plasma membrane of cell tip	4	4/462	15/27189	9.68102e-05	0.00733474
GO:0000324	CC	fungal-type vacuole	4	4/462	15/27189	9.68102e-05	0.00733474
GO:0032153	CC	cell division site	4	4/462	17/27189	0.000164306	0.0113754
GO:0000322	CC	storage vacuole	4	4/462	23/27189	0.00056391	0.0351067
GO:0016491	MF	oxidoreductase activity	82	82/462	3074/27189	4.05458e-05	0.00422888
GO:0022857	MF	transmembrane transporter activity	58	58/462	1880/27189	1.09176e-05	0.00159417
GO:0005215	MF	transporter activity	58	58/462	1970/27189	4.03982e-05	0.00422888
GO:0004553	MF	hydrolase activity, hydrolyzing O-glycosyl compounds	36	36/462	640/27189	6.75471e-07	0.000776239
GO:0016798	MF	hydrolase activity, acting on glycosyl bonds	36	36/462	677/27189	7.21969e-07	0.000776239
GO:0046906	MF	tetrapyrrole binding	32	32/462	617/27189	9.84408e-07	0.000776239
GO:0020037	MF	heme binding	30	30/462	549/27189	9.92943e-07	0.000776239
GO:0004601	MF	peroxidase activity	17	17/462	239/27189	8.24484e-07	0.000776239
GO:0016684	MF	oxidoreductase activity, acting on peroxide as acceptor	17	17/462	246/27189	1.22901e-06	0.000776239
GO:0016209	MF	antioxidant activity	17	17/462	310/27189	2.61933e-05	0.00284268
GO:0051537	MF	2 iron, 2 sulfur cluster binding	8	8/462	80/27189	6.50499e-05	0.00586984
GO:0035673	MF	oligopeptide transmembrane transporter activity	7	7/462	37/27189	2.58963e-06	0.000838156
GO:0015198	MF	oligopeptide transporter activity	7	7/462	37/27189	2.58963e-06	0.000838156
GO:1904680	MF	peptide transmembrane transporter activity	7	7/462	40/27189	4.4877e-06	0.000838156
GO:0015197	MF	peptide transporter activity	7	7/462	40/27189	4.4877e-06	0.000838156
GO:0004650	MF	polygalacturonase activity	7	7/462	48/27189	1.57647e-05	0.00189149
GO:0042887	MF	amide transmembrane transporter activity	7	7/462	52/27189	2.70177e-05	0.00289306
GO:0022897	MF	proton-dependent peptide secondary active transmembrane transporter activity	6	6/462	35/27189	2.49028e-05	0.00274817
GO:0015333	MF	peptide:proton symporter activity	6	6/462	35/27189	2.49028e-05	0.00274817
GO:0016762	MF	xyloglucan:xyloglucosyl transferase activity	6	6/462	40/27189	5.48107e-05	0.00507807
GO:0046556	MF	alpha-L-arabinofuranosidase activity	5	5/462	27/27189	8.21776e-05	0.00680379
GO:0016682	MF	oxidoreductase activity, acting on diphenols and related substances as donors, oxygen as acceptor	5	5/462	42/27189	0.000702462	0.0417537
GO:0008942	MF	nitrite reductase [NAD(P)H] activity	4	4/462	13/27189	5.20978e-05	0.00492232
GO:0052716	MF	hydroquinone:oxygen oxidoreductase activity	4	4/462	14/27189	7.19587e-05	0.00608316
GO:0098809	MF	nitrite reductase activity	4	4/462	15/27189	9.68102e-05	0.00733474
GO:0071916	MF	dipeptide transmembrane transporter activity	4	4/462	15/27189	9.68102e-05	0.00733474
GO:0042936	MF	dipeptide transporter activity	4	4/462	15/27189	9.68102e-05	0.00733474
GO:0042937	MF	tripeptide transporter activity	4	4/462	16/27189	0.000127351	0.00921401
GO:0046857	MF	oxidoreductase activity, acting on other nitrogenous compounds as donors, with NAD or NADP as acceptor	4	4/462	24/27189	0.000667668	0.0403161
GO:0008840	MF	4-hydroxy-tetrahydrodipicolinate synthase	3	3/462	8/27189	0.000256171	0.0171443
GO:0047705	MF	bilirubin oxidase activity	2	2/462	3/27189	0.000854608	0.0493767

## Sheet: Table S4
Table S4. A list of transcription factors in the SlD vs SlG_C and SlG_C vs SlG_N groups.
"up": respresents up-regulation of gene expression, "down": respresents down-regulation of gene expression (|log2 FC| ≥ 1, Padj -value< 0.05).
FC: fold change of gene expression level.
Family	Gene ID	log2 FC	Regulate	Padj-Value	NR Description
Transcription factors in the SlD vs SlG_C group
B3_superfamily	TRINITY_DN10755_c0_g1	4.28922	up	0.00831257
B3_superfamily	TRINITY_DN6936_c0_g1	2.26743	up	3.77728e-05
B3_superfamily	TRINITY_DN3309_c0_g1	1.14573	up	0.00119813	hypothetical protein BVRB_2g045220 [Beta vulgaris subsp. vulgaris]
B3_superfamily	TRINITY_DN3310_c0_g2	1.87719	up	0.017679	PREDICTED: B3 domain-containing transcription factor VRN1-like isoform X1 [Juglans regia]
B3_superfamily	TRINITY_DN43644_c0_g1	-3.65369	down	0.0394171	PREDICTED: putative B3 domain-containing protein Os03g0621600 [Beta vulgaris subsp. vulgaris]
B3_superfamily	TRINITY_DN9306_c1_g1	-1.78118	down	3.99004e-11	B3 domain-containing transcription factor ABI3-like [Chenopodium quinoa]
B3_superfamily	TRINITY_DN26752_c0_g1	1.69386	up	0.000110096	B3 domain-containing protein Os02g0683500-like [Chenopodium quinoa]
B3_superfamily	TRINITY_DN13194_c0_g1	4.20744	up	0.00124544	B3 domain-containing protein Os03g0212300-like [Chenopodium quinoa]
B3_superfamily	TRINITY_DN20020_c1_g2	4.29859	up	1.78417e-10	B3 domain-containing protein Os03g0212300-like [Chenopodium quinoa]
B3_superfamily	TRINITY_DN32173_c0_g1	5.9487	up	0.000124644	PREDICTED: putative AP2/ERF and B3 domain-containing protein Os01g0140700 [Beta vulgaris subsp. vulgaris]
B3_superfamily	TRINITY_DN57490_c0_g1	1.34888	up	0.0128953	B3 domain-containing protein REM16-like [Chenopodium quinoa]
B3_superfamily	TRINITY_DN26319_c0_g1	5.17684	up	0.0221231	hypothetical protein MIMGU_mgv11b019660mg [Erythranthe guttata]
B3_superfamily	TRINITY_DN10526_c0_g1	3.07823	up	0.0048008	B3 domain-containing protein Os03g0620500-like [Cucurbita pepo subsp. pepo]
B3_superfamily	TRINITY_DN10534_c0_g1	1.45771	up	0.011734	B3 domain-containing protein REM9-like isoform X1 [Chenopodium quinoa]
B3_superfamily	TRINITY_DN4225_c0_g1	-1.42	down	0.000124307	B3 domain-containing protein REM16-like [Chenopodium quinoa]
B3_superfamily	TRINITY_DN950_c0_g1	13.3956	up	1.29156e-27	AP2/ERF and B3 domain-containing transcription factor RAV1-like [Chenopodium quinoa]
B3_superfamily	TRINITY_DN23273_c0_g1	1.56998	up	0.000583314	PREDICTED: B3 domain-containing protein At4g34400-like [Beta vulgaris subsp. vulgaris]
B3_superfamily	TRINITY_DN3310_c0_g1	2.61092	up	9.30249e-09
B3_superfamily	TRINITY_DN9008_c0_g1	1.67916	up	0.00862622	B3 domain-containing protein REM8-like [Lactuca sativa]
B3_superfamily	TRINITY_DN9039_c0_g1	12.3748	up	3.31038e-23	PREDICTED: putative AP2/ERF and B3 domain-containing protein Os01g0140700 [Beta vulgaris subsp. vulgaris]
B3_superfamily	TRINITY_DN46709_c0_g1	3.28674	up	0.0130083	B3 domain-containing protein Os03g0212300-like [Chenopodium quinoa]
B3_superfamily	TRINITY_DN7208_c0_g1	1.50765	up	0.0435294	B3 domain-containing protein REM16-like [Chenopodium quinoa]
B3_superfamily	TRINITY_DN17769_c0_g1	3.42434	up	1.68501e-06	hypothetical protein F0562_003864 [Nyssa sinensis]
C2H2	TRINITY_DN23971_c1_g1	2.83036	up	0.00452934	uncharacterized protein LOC112032696 [Quercus suber]
C2H2	TRINITY_DN12334_c0_g1	4.02246	up	7.51173e-07	PREDICTED: zinc finger protein STOP1 homolog [Beta vulgaris subsp. vulgaris]
C2H2	TRINITY_DN25726_c0_g1	1.18219	up	1.4356e-05	uncharacterized protein LOC110688290 [Chenopodium quinoa]
C2H2	TRINITY_DN3516_c1_g1	-1.08413	down	1.62028e-10	PREDICTED: protein indeterminate-domain 2 [Beta vulgaris subsp. vulgaris]
C2H2	TRINITY_DN17249_c0_g1	6.18134	up	7.99188e-05	transcription factor btd-like [Quercus suber]
C2H2	TRINITY_DN38538_c0_g2	7.56864	up	5.06324e-07	C2H2 finger domain transcription factor crzA-like [Quercus suber]
C2H2	TRINITY_DN38538_c1_g2	7.53994	up	4.00656e-07	C2H2 finger domain transcription factor crzA-like [Quercus suber]
C2H2	TRINITY_DN30063_c0_g1	3.52723	up	0.00154427	biofilm and cell wall regulator 1-like [Quercus suber]
C2H2	TRINITY_DN10750_c0_g1	3.99706	up	8.63127e-11	predicted protein [Hordeum vulgare subsp. vulgare]
C2H2	TRINITY_DN69161_c0_g1	8.50158	up	3.82034e-10	C2H2 finger domain transcription factor crzA-like [Quercus suber]
C2H2	TRINITY_DN2886_c0_g1	1.02504	up	2.9543e-06	protein indeterminate-domain 16-like [Spinacia oleracea]
bHLH	TRINITY_DN653_c1_g2	-1.31907	down	4.55262e-11	transcription factor ICE1-like [Chenopodium quinoa]
bHLH	TRINITY_DN3718_c0_g1	7.2246	up	3.28104e-06	transcription factor bHLH120-like [Spinacia oleracea]
bHLH	TRINITY_DN26049_c0_g1	4.41733	up	2.81941e-19	transcription factor bHLH153-like isoform X1 [Chenopodium quinoa]
bHLH	TRINITY_DN38199_c0_g1	5.59077	up	0.000547644	putative transcription factor bHLH041 [Chenopodium quinoa]
bHLH	TRINITY_DN1125_c0_g1	-1.41967	down	3.47177e-21	PREDICTED: transcription factor bHLH71 [Beta vulgaris subsp. vulgaris]
bHLH	TRINITY_DN22406_c0_g1	3.56932	up	5.22542e-05	PREDICTED: transcription factor bHLH25 [Beta vulgaris subsp. vulgaris]
bHLH	TRINITY_DN7484_c2_g1	5.74417	up	4.01538e-08	transcription factor HEC3-like [Chenopodium quinoa]
bHLH	TRINITY_DN46355_c0_g3	6.17433	up	0.000236215	transcriptional regulator of yeast form adherence 6-like [Quercus suber]
bHLH	TRINITY_DN24777_c0_g2	2.38538	up	0.0143084	transcription factor UNE12-like [Spinacia oleracea]
bHLH	TRINITY_DN63928_c0_g1	2.02508	up	0.00472314	transcription factor bHLH160-like isoform X1 [Chenopodium quinoa]
bHLH	TRINITY_DN25103_c0_g2	6.93192	up	9.20646e-25	transcription factor bHLH137-like [Chenopodium quinoa]
bHLH	TRINITY_DN4639_c0_g1	-1.73524	down	3.25453e-07	transcription factor MUTE-like [Chenopodium quinoa]
bHLH	TRINITY_DN48548_c0_g1	7.58597	up	4.6083e-07
bHLH	TRINITY_DN45339_c0_g1	7.71377	up	1.61967e-08	PREDICTED: transcription factor bHLH94 [Beta vulgaris subsp. vulgaris]
bHLH	TRINITY_DN41048_c0_g1	5.86807	up	2.14232e-08	PREDICTED: transcription factor APG-like [Beta vulgaris subsp. vulgaris]
bHLH	TRINITY_DN5062_c0_g1	2.60426	up	5.33656e-37	PREDICTED: transcription factor bHLH93 [Beta vulgaris subsp. vulgaris]
bHLH	TRINITY_DN38531_c0_g1	2.53288	up	0.017077	transcription factor UNE10-like isoform X2 [Chenopodium quinoa]
bHLH	TRINITY_DN1573_c0_g2	1.28581	up	2.17217e-13	transcription factor BIM2-like [Chenopodium quinoa]
bHLH	TRINITY_DN1554_c0_g1	-1.37206	down	2.03624e-10	transcription factor bHLH130-like [Spinacia oleracea]
bHLH	TRINITY_DN21030_c0_g2	5.44318	up	0.00643698	transcription factor FAMA-like isoform X1 [Chenopodium quinoa]
bHLH	TRINITY_DN12249_c0_g1	2.74624	up	0.016202	transcription factor PRE6-like [Chenopodium quinoa]
bHLH	TRINITY_DN10338_c0_g1	2.02578	up	3.11788e-06	transcription factor bHLH30-like [Spinacia oleracea]
bHLH	TRINITY_DN3456_c0_g1	3.521	up	3.951e-67	transcription factor bHLH62-like [Spinacia oleracea]
bHLH	TRINITY_DN17346_c0_g1	2.29258	up	0.00102052	transcription factor BEE 3-like [Chenopodium quinoa]
bHLH	TRINITY_DN16435_c0_g1	3.64723	up	1.0219e-11	PREDICTED: putative transcription factor bHLH086 [Beta vulgaris subsp. vulgaris]
bHLH	TRINITY_DN3658_c0_g1	1.37441	up	6.16367e-11	PREDICTED: transcription factor HEC1 [Beta vulgaris subsp. vulgaris]
bHLH	TRINITY_DN160_c0_g2	-1.22753	down	6.1068e-13	Xtranscription factor bHLH49-like isoform X2 [Chenopodium quinoa]
bHLH	TRINITY_DN966_c0_g1	-1.29454	down	1.19521e-10	transcription factor PIF1-like [Chenopodium quinoa]
bHLH	TRINITY_DN61502_c0_g1	5.60508	up	0.00289331	transcription factor NAI1-like [Chenopodium quinoa]
bHLH	TRINITY_DN10423_c0_g1	2.04484	up	1.7451e-05	transcription factor ICE1-like [Spinacia oleracea]
bHLH	TRINITY_DN2874_c0_g1	1.76209	up	1.81873e-12	PREDICTED: transcription factor PIF7 [Beta vulgaris subsp. vulgaris]
bHLH	TRINITY_DN15994_c0_g1	2.8312	up	7.03561e-58	transcription factor bHLH87-like [Chenopodium quinoa]
bHLH	TRINITY_DN12115_c0_g1	-1.10234	down	2.29561e-11	PREDICTED: transcription factor bHLH48 [Beta vulgaris subsp. vulgaris]
bHLH	TRINITY_DN377_c0_g1	3.43882	up	3.33098e-30	transcription factor HBI1-like [Chenopodium quinoa]
C3H	TRINITY_DN13596_c1_g1	-2.87918	down	2.24815e-54	zinc finger CCCH domain-containing protein 20-like [Spinacia oleracea]
C3H	TRINITY_DN7491_c0_g1	3.00714	up	4.92002e-35	PREDICTED: zinc finger CCCH domain-containing protein 53 [Beta vulgaris subsp. vulgaris]
C3H	TRINITY_DN9866_c0_g1	2.46354	up	0.000621631	PREDICTED: zinc finger CCCH domain-containing protein 14 [Beta vulgaris subsp. vulgaris]
C3H	TRINITY_DN6786_c0_g1	2.06993	up	3.60955e-16	zinc finger CCCH domain-containing protein ZFN-like [Chenopodium quinoa]
C3H	TRINITY_DN6786_c0_g2	2.82212	up	2.73777e-09	zinc finger CCCH domain-containing protein ZFN-like [Chenopodium quinoa]
C3H	TRINITY_DN5100_c0_g1	-1.08622	down	0.000169935	splicing factor U2af small subunit B-like isoform X1 [Chenopodium quinoa]
C3H	TRINITY_DN1685_c0_g1	1.28263	up	0.00468292	zinc finger CCCH domain-containing protein 39 [Spinacia oleracea]
C3H	TRINITY_DN3192_c0_g1	1.03316	up	2.76645e-08	PREDICTED: zinc finger CCCH domain-containing protein 3 isoform X1 [Beta vulgaris subsp. vulgaris]
C3H	TRINITY_DN18920_c1_g2	1.68867	up	0.000403133	zinc finger CCCH domain-containing protein 39-like isoform X2 [Chenopodium quinoa]
C3H	TRINITY_DN17301_c0_g1	-2.94921	down	1.66203e-28	PREDICTED: zinc finger CCCH domain-containing protein 2 [Beta vulgaris subsp. vulgaris]
C3H	TRINITY_DN2797_c0_g1	4.04154	up	3.40067e-51	zinc finger CCCH domain-containing protein 47-like [Chenopodium quinoa]
C2C2	TRINITY_DN33485_c0_g1	2.33857	up	0.000430503	hypothetical protein BVRB_6g129760 isoform A [Beta vulgaris subsp. vulgaris]
C2C2	TRINITY_DN3710_c0_g3	3.0253	up	2.41359e-24	GATA transcription factor 1-like isoform X1 [Spinacia oleracea]
C2C2	TRINITY_DN4052_c0_g2	-4.35363	down	2.39077e-05	PREDICTED: GATA transcription factor 16 [Beta vulgaris subsp. vulgaris]
C2C2	TRINITY_DN2037_c0_g1	-1.01554	down	7.67169e-09	PREDICTED: putative GATA transcription factor 22 [Beta vulgaris subsp. vulgaris]
C2C2	TRINITY_DN12978_c0_g1	2.20084	up	0.0333372	GATA transcription factor 19-like [Chenopodium quinoa]
MADS	TRINITY_DN23767_c0_g1	3.20709	up	9.07041e-11	floral homeotic protein DEFICIENS-like [Chenopodium quinoa]
MADS	TRINITY_DN27447_c0_g1	-1.30305	down	0.0296219	PREDICTED: floral homeotic protein AGAMOUS isoform X1 [Beta vulgaris subsp. vulgaris]
MADS	TRINITY_DN63984_c0_g1	3.85181	up	4.55373e-05	MADS-box transcription factor 23-like isoform X2 [Chenopodium quinoa]
MADS	TRINITY_DN8218_c0_g1	2.02232	up	0.00359689	MADS-box protein AGL24-like [Chenopodium quinoa]
MADS	TRINITY_DN14926_c0_g1	3.70475	up	8.54953e-05	agamous-like MADS-box protein AGL12 isoform X2 [Spinacia oleracea]
MADS	TRINITY_DN8750_c0_g1	7.92008	up	1.87264e-77	MADS-box transcription factor 23-like isoform X1 [Chenopodium quinoa]
MADS	TRINITY_DN8706_c0_g1	3.32858	up	6.85633e-96	agamous-like MADS-box protein AGL65 isoform X1 [Chenopodium quinoa]
MADS	TRINITY_DN31941_c0_g1	4.5251	up	1.10941e-06	Agamous-like MADS-box protein AGL15 [Morella rubra]
MADS	TRINITY_DN9609_c0_g3	6.6571	up	3.74253e-05	agamous-like MADS-box protein AGL61 [Populus alba]
MADS	TRINITY_DN80639_c0_g1	6.18507	up	0.000149078	PREDICTED: agamous-like MADS-box protein AGL80 [Beta vulgaris subsp. vulgaris]
MADS	TRINITY_DN8509_c0_g1	-1.01224	down	1.47265e-07	PREDICTED: MADS-box protein JOINTLESS [Beta vulgaris subsp. vulgaris]
MADS	TRINITY_DN4427_c0_g1	4.57403	up	5.4323e-10	agamous-like MADS-box protein AGL61 [Citrus sinensis]
MADS	TRINITY_DN13012_c0_g1	3.73879	up	9.14731e-23	MADS28 [Erycina pusilla]
MADS	TRINITY_DN14792_c0_g1	3.76736	up	0.00021351	transcription factor of morphogenesis MCM1-like [Quercus suber]
SBP	TRINITY_DN4078_c0_g1	2.65491	up	1.69905e-13	squamosa promoter-binding-like protein 13A isoform X2 [Chenopodium quinoa]
SBP	TRINITY_DN11253_c0_g1	1.06422	up	1.92452e-08	PREDICTED: squamosa promoter-binding-like protein 2 [Beta vulgaris subsp. vulgaris]
SBP	TRINITY_DN4508_c0_g2	-2.97727	down	0.0231086	hypothetical protein BVRB_6g136190 [Beta vulgaris subsp. vulgaris]
AP2/ERF	TRINITY_DN14513_c0_g1	3.43027	up	0.00712256	ethylene-responsive transcription factor TINY-like [Chenopodium quinoa]
AP2/ERF	TRINITY_DN18269_c0_g1	7.72396	up	7.94687e-09	PREDICTED: ethylene-responsive transcription factor ERF039 [Beta vulgaris subsp. vulgaris]
AP2/ERF	TRINITY_DN14695_c0_g1	4.7352	up	6.36519e-08	ethylene-responsive transcription factor 1B-like [Chenopodium quinoa]
AP2/ERF	TRINITY_DN13990_c0_g2	2.43069	up	1.82689e-13	PREDICTED: AP2-like ethylene-responsive transcription factor ANT [Beta vulgaris subsp. vulgaris]
AP2/ERF	TRINITY_DN653_c0_g2	-1.50937	down	3.51857e-18	dehydration responsive element binding transcription factor 2C [Haloxylon ammodendron]
AP2/ERF	TRINITY_DN9501_c0_g1	4.71146	up	1.93668e-17	ethylene-responsive transcription factor ERF027-like [Chenopodium quinoa]
AP2/ERF	TRINITY_DN3238_c0_g1	-2.65008	down	2.41789e-15	PREDICTED: ethylene-responsive transcription factor ABI4 [Beta vulgaris subsp. vulgaris]
AP2/ERF	TRINITY_DN9315_c0_g1	1.77509	up	2.19188e-09	ethylene-responsive transcription factor ERF043-like [Chenopodium quinoa]
AP2/ERF	TRINITY_DN22382_c0_g1	2.31627	up	0.000523852	ethylene-responsive transcription factor ERF061-like [Chenopodium quinoa]
AP2/ERF	TRINITY_DN17554_c0_g1	-1.27213	down	0.0168534	PREDICTED: AP2-like ethylene-responsive transcription factor PLT2 [Beta vulgaris subsp. vulgaris]
AP2/ERF	TRINITY_DN42523_c0_g2	-1.32645	down	0.00470508	ethylene-responsive transcription factor CRF1-like [Chenopodium quinoa]
AP2/ERF	TRINITY_DN18028_c0_g1	4.23772	up	4.4818e-21	PREDICTED: AP2-like ethylene-responsive transcription factor TOE3 [Beta vulgaris subsp. vulgaris]
AP2/ERF	TRINITY_DN16242_c0_g4	4.92582	up	9.25679e-10	ethylene-responsive transcription factor WRI1-like [Chenopodium quinoa]
AP2/ERF	TRINITY_DN5270_c0_g1	5.3841	up	1.38829e-52	PREDICTED: ethylene-responsive transcription factor 2 [Beta vulgaris subsp. vulgaris]
AP2/ERF	TRINITY_DN5261_c0_g1	5.5973	up	1.02199e-43	hypothetical protein GH714_000070 [Hevea brasiliensis]
AP2/ERF	TRINITY_DN10026_c0_g1	2.7475	up	3.12625e-06	DREBa [Suaeda salsa]
AP2/ERF	TRINITY_DN8680_c0_g2	-1.0438	down	2.75767e-06	ethylene-responsive transcription factor CRF2-like [Spinacia oleracea]
AP2/ERF	TRINITY_DN5064_c0_g1	8.10175	up	7.55192e-10	ethylene-responsive transcription factor ERF014-like [Chenopodium quinoa]
AP2/ERF	TRINITY_DN5778_c0_g1	-3.93851	down	1.81793e-63	ethylene-responsive transcription factor ERF010-like [Spinacia oleracea]
AP2/ERF	TRINITY_DN18992_c0_g1	6.21728	up	3.93796e-11	ethylene-responsive transcription factor ERF098-like [Chenopodium quinoa]
AP2/ERF	TRINITY_DN10875_c0_g1	2.77424	up	5.15881e-10	PREDICTED: AP2-like ethylene-responsive transcription factor BBM [Beta vulgaris subsp. vulgaris]
AP2/ERF	TRINITY_DN11035_c2_g1	2.65674	up	3.10257e-06	ethylene-responsive transcription factor ERF114-like [Chenopodium quinoa]
AP2/ERF	TRINITY_DN11349_c0_g1	2.46084	up	0.00109913	ethylene-responsive transcription factor LEP-like [Chenopodium quinoa]
AP2/ERF	TRINITY_DN23862_c0_g1	1.33742	up	0.000578369	ethylene-responsive transcription factor ERF110-like [Chenopodium quinoa]
AP2/ERF	TRINITY_DN27153_c0_g1	2.46211	up	0.00337759	ethylene-responsive transcription factor TINY-like [Chenopodium quinoa]
AP2/ERF	TRINITY_DN1997_c0_g1	1.53775	up	1.62797e-20	AP2-like ethylene-responsive transcription factor TOE3 isoform X3 [Chenopodium quinoa]
AP2/ERF	TRINITY_DN2103_c0_g1	1.56186	up	6.62472e-10	PREDICTED: floral homeotic protein APETALA 2 [Beta vulgaris subsp. vulgaris]
AP2/ERF	TRINITY_DN15633_c0_g2	5.75771	up	2.73483e-11	PREDICTED: ethylene-responsive transcription factor WIN1 [Beta vulgaris subsp. vulgaris]
AP2/ERF	TRINITY_DN8900_c0_g2	5.27865	up	3.30278e-42	PREDICTED: ethylene-responsive transcription factor ERF113 isoform X2 [Beta vulgaris subsp. vulgaris]
AP2/ERF	TRINITY_DN2402_c0_g1	-2.90043	down	4.10211e-21	DREB2A [Salicornia brachiata]
AP2/ERF	TRINITY_DN6002_c0_g1	-1.05539	down	0.00247395	ethylene-responsive transcription factor 11-like [Chenopodium quinoa]
AP2/ERF	TRINITY_DN2871_c0_g1	-5.98803	down	3.97767e-86	dehydration-responsive element-binding protein 2D-like [Chenopodium quinoa]
AP2/ERF	TRINITY_DN13483_c0_g1	2.16803	up	0.000548432	ethylene-responsive transcription factor 1B-like [Chenopodium quinoa]
AP2/ERF	TRINITY_DN435_c0_g1	2.86919	up	2.67335e-30	ethylene-responsive transcription factor RAP2-12-like [Chenopodium quinoa]
AP2/ERF	TRINITY_DN9523_c0_g1	6.62943	up	2.40072e-05	PREDICTED: ethylene-responsive transcription factor ERF003 [Beta vulgaris subsp. vulgaris]
AP2/ERF	TRINITY_DN32218_c0_g1	-4.92513	down	0.0084492	AP2-like ethylene-responsive transcription factor At1g79700 isoform X1 [Spinacia oleracea]
C2C2	TRINITY_DN7194_c0_g1	3.80974	up	1.17904e-05	dof zinc finger protein DOF1.5-like [Chenopodium quinoa]
C2C2	TRINITY_DN7484_c0_g1	2.474	up	0.0347544	PREDICTED: dof zinc finger protein DOF3.7 [Beta vulgaris subsp. vulgaris]
C2C2	TRINITY_DN7484_c0_g2	2.14365	up	8.95667e-06	dof zinc finger protein DOF2.5 [Chenopodium quinoa]
C2C2	TRINITY_DN24786_c0_g2	3.1431	up	7.10553e-13	dof zinc finger protein DOF3.5-like [Chenopodium quinoa]
C2C2	TRINITY_DN23091_c0_g1	2.92317	up	4.56075e-12	dof zinc finger protein DOF2.1-like [Chenopodium quinoa]
C2C2	TRINITY_DN21518_c0_g1	-1.29386	down	5.7076e-10	cyclic dof factor 3-like isoform X1 [Chenopodium quinoa]
C2C2	TRINITY_DN23839_c0_g1	2.47183	up	1.29599e-12	PREDICTED: dof zinc finger protein DOF3.1 [Beta vulgaris subsp. vulgaris]
C2C2	TRINITY_DN413_c2_g1	1.37537	up	5.06435e-06	dof zinc finger protein DOF2.1-like [Chenopodium quinoa]
MYB_superfamily	TRINITY_DN1481_c0_g1	-1.98182	down	5.04432e-22	transcription factor DIVARICATA-like [Spinacia oleracea]
MYB_superfamily	TRINITY_DN1434_c0_g1	1.17702	up	5.40716e-11	PREDICTED: transcription factor DIVARICATA [Beta vulgaris subsp. vulgaris]
MYB_superfamily	TRINITY_DN1794_c0_g2	2.04313	up	9.71871e-14	transcription factor DUO1-like [Chenopodium quinoa]
MYB_superfamily	TRINITY_DN9355_c0_g1	-2.59293	down	1.90282e-18	PREDICTED: transcription factor RAX1-like [Beta vulgaris subsp. vulgaris]
MYB_superfamily	TRINITY_DN1158_c0_g1	1.4156	up	5.43114e-12	protein PHR1-LIKE 2-like isoform X1 [Spinacia oleracea]
MYB_superfamily	TRINITY_DN4138_c0_g1	1.05723	up	2.39316e-08	transcription factor MYB124-like [Chenopodium quinoa]
MYB_superfamily	TRINITY_DN2510_c0_g2	1.49212	up	2.44374e-17	PREDICTED: transcriptional adapter ADA2b [Beta vulgaris subsp. vulgaris]
MYB_superfamily	TRINITY_DN14382_c1_g1	-2.72388	down	4.45701e-07	transcription factor MYB41-like [Chenopodium quinoa]
MYB_superfamily	TRINITY_DN27783_c0_g1	-1.88937	down	4.14489e-18	PREDICTED: uncharacterized protein LOC104903953 [Beta vulgaris subsp. vulgaris]
MYB_superfamily	TRINITY_DN2900_c0_g4	3.02741	up	1.18363e-15	PREDICTED: myb-related protein 3R-1 [Beta vulgaris subsp. vulgaris]
MYB_superfamily	TRINITY_DN5204_c2_g1	3.54058	up	1.05281e-25	transcription factor MYB61-like [Chenopodium quinoa]
MYB_superfamily	TRINITY_DN4652_c0_g1	3.36394	up	8.71764e-12	PREDICTED: myb-related protein Myb4 [Beta vulgaris subsp. vulgaris]
MYB_superfamily	TRINITY_DN12499_c0_g1	1.09609	up	2.8987e-07	transcription repressor MYB6-like [Spinacia oleracea]
MYB_superfamily	TRINITY_DN68808_c0_g1	5.43212	up	0.00839818	PREDICTED: transcription factor MYB28 [Beta vulgaris subsp. vulgaris]
MYB_superfamily	TRINITY_DN4771_c0_g2	1.50985	up	1.91848e-18	transcription factor MYB44-like [Chenopodium quinoa]
MYB_superfamily	TRINITY_DN4770_c0_g1	-1.0323	down	2.70332e-06	PREDICTED: uncharacterized protein LOC104899762 isoform X2 [Beta vulgaris subsp. vulgaris]
MYB_superfamily	TRINITY_DN5919_c0_g1	3.89915	up	1.19083e-33	transcription factor MYB14-like [Chenopodium quinoa]
MYB_superfamily	TRINITY_DN5004_c0_g1	1.44589	up	8.48005e-12	PREDICTED: myb-related protein 306 [Beta vulgaris subsp. vulgaris]
MYB_superfamily	TRINITY_DN5072_c0_g1	1.80031	up	1.82794e-07	probable transcription factor KAN4 [Chenopodium quinoa]
MYB_superfamily	TRINITY_DN17212_c0_g1	5.37591	up	4.11447e-16	transcription factor MYB106-like [Spinacia oleracea]
MYB_superfamily	TRINITY_DN34225_c0_g1	2.10513	up	5.58593e-08	PREDICTED: protein ODORANT1-like [Beta vulgaris subsp. vulgaris]
MYB_superfamily	TRINITY_DN7516_c0_g1	4.41611	up	4.14077e-117	PREDICTED: transcription factor MYB1R1 [Beta vulgaris subsp. vulgaris]
MYB_superfamily	TRINITY_DN3108_c0_g1	1.06872	up	1.27098e-08	transcription activator GLK1-like isoform X2 [Chenopodium quinoa]
MYB_superfamily	TRINITY_DN3148_c0_g1	2.24326	up	4.15768e-25	transcription factor SRM1-like [Chenopodium quinoa]
MYB_superfamily	TRINITY_DN47610_c0_g4	-1.16082	down	2.35007e-10	uncharacterized protein LOC110683740 isoform X1 [Chenopodium quinoa]
MYB_superfamily	TRINITY_DN6172_c1_g1	4.93202	up	1.6177e-22	protein ODORANT1-like [Chenopodium quinoa]
MYB_superfamily	TRINITY_DN6172_c0_g1	4.052	up	2.91164e-30	PREDICTED: transcription factor MYB30-like [Beta vulgaris subsp. vulgaris]
MYB_superfamily	TRINITY_DN519_c0_g2	1.25854	up	0.00477955	transcription factor MYB80-like [Chenopodium quinoa]
MYB_superfamily	TRINITY_DN4291_c0_g1	-1.03584	down	1.51667e-09	protein REVEILLE 8-like isoform X2 [Chenopodium quinoa]
MYB_superfamily	TRINITY_DN6509_c0_g1	4.43818	up	3.51107e-51	two-component response regulator-like APRR2 [Chenopodium quinoa]
MYB_superfamily	TRINITY_DN16402_c0_g1	1.84075	up	0.016151	transcription factor MYB83-like [Spinacia oleracea]
MYB_superfamily	TRINITY_DN34788_c0_g1	6.64317	up	9.08647e-06	PREDICTED: transcription repressor MYB6 [Beta vulgaris subsp. vulgaris]
MYB_superfamily	TRINITY_DN1933_c0_g1	2.56502	up	9.11783e-45	transcription factor DIVARICATA-like [Chenopodium quinoa]
MYB_superfamily	TRINITY_DN1357_c0_g1	2.07117	up	6.65648e-14	uncharacterized protein LOC110695055 [Chenopodium quinoa]
MYB_superfamily	TRINITY_DN7741_c0_g1	2.37428	up	4.03874e-11	uncharacterized protein LOC110733902 isoform X1 [Chenopodium quinoa]
MYB_superfamily	TRINITY_DN2154_c1_g1	5.18284	up	5.59294e-25	myb-related protein 308-like [Chenopodium quinoa]
MYB_superfamily	TRINITY_DN16007_c0_g1	2.96705	up	1.39305e-08	hypothetical protein BVRB_5g121510 [Beta vulgaris subsp. vulgaris]
MYB_superfamily	TRINITY_DN448_c0_g1	-2.18693	down	0.000427751	protein REVEILLE 1 isoform X2 [Spinacia oleracea]
MYB_superfamily	TRINITY_DN3077_c0_g1	1.51897	up	3.25248e-14	transcription factor DIVARICATA-like [Chenopodium quinoa]
MYB_superfamily	TRINITY_DN17946_c0_g1	3.19366	up	0.0258157	transcription factor RAX3-like [Chenopodium quinoa]
MYB_superfamily	TRINITY_DN6653_c1_g1	3.37736	up	3.77543e-09	transcription factor RAX3-like [Chenopodium quinoa]
MYB_superfamily	TRINITY_DN6653_c0_g1	4.17281	up	2.88599e-18	PREDICTED: transcription factor RAX2 [Beta vulgaris subsp. vulgaris]
LBD (AS2/LOB)	TRINITY_DN42217_c0_g1	1.6435	up	0.00882955	homeobox-leucine zipper protein ATHB-22-like [Chenopodium quinoa]
LBD (AS2/LOB)	TRINITY_DN5987_c0_g2	-1.10738	down	0.0193217	WUSCHEL-related homeobox 3-like [Chenopodium quinoa]
LBD (AS2/LOB)	TRINITY_DN10771_c0_g1	5.58451	up	1.91758e-05	WUSCHEL-related homeobox 4-like isoform X1 [Chenopodium quinoa]
HSF	TRINITY_DN7010_c0_g1	-1.34758	down	1.08401e-07	heat stress transcription factor B-2a-like [Chenopodium quinoa]
HSF	TRINITY_DN4631_c0_g1	-1.2039	down	0.00012038	heat stress transcription factor A-2c-like [Chenopodium quinoa]
HSF	TRINITY_DN1566_c0_g1	-3.51576	down	1.54167e-37	heat stress transcription factor C-1-like [Chenopodium quinoa]
HSF	TRINITY_DN30861_c0_g1	-1.46899	down	2.26736e-07	heat stress transcription factor A-8 [Spinacia oleracea]
HSF	TRINITY_DN2888_c0_g1	-1.84792	down	1.98705e-07	heat stress transcription factor B-4-like [Chenopodium quinoa]
TCP	TRINITY_DN3748_c0_g1	2.62549	up	2.61782e-34	transcription factor TCP4-like [Chenopodium quinoa]
TCP	TRINITY_DN62039_c0_g1	-3.22472	down	0.0112989	hypothetical protein BVRB_8g182060 [Beta vulgaris subsp. vulgaris]
TCP	TRINITY_DN15121_c0_g1	2.19302	up	0.0272699	transcription factor TCP20-like [Spinacia oleracea]
TCP	TRINITY_DN12396_c0_g1	7.81418	up	6.45205e-08	transcription factor TCP15-like [Chenopodium quinoa]
TCP	TRINITY_DN8328_c0_g1	1.51933	up	2.83309e-05	PREDICTED: transcription factor TCP17 [Beta vulgaris subsp. vulgaris]
TCP	TRINITY_DN5148_c0_g1	4.6656	up	6.45182e-39	transcription factor TCP19-like [Chenopodium quinoa]
TCP	TRINITY_DN2103_c1_g1	1.28186	up	2.24845e-10	transcription factor TCP7-like [Chenopodium quinoa]
TCP	TRINITY_DN34923_c0_g1	7.05146	up	1.07751e-37	transcription factor TCP14 [Spinacia oleracea]
bZIP	TRINITY_DN28187_c0_g1	4.03298	up	3.18748e-17	cross-pathway control protein A-like [Quercus suber]
bZIP	TRINITY_DN24823_c0_g1	4.80256	up	0.0397096	protein FD-like [Chenopodium quinoa]
bZIP	TRINITY_DN3093_c0_g1	-2.57935	down	4.90469e-33	protein ABSCISIC ACID-INSENSITIVE 5-like isoform X1 [Chenopodium quinoa]
bZIP	TRINITY_DN12356_c0_g4	2.63412	up	0.00202168	BZIP-type transcription factor MBZ1-like [Quercus suber]
bZIP	TRINITY_DN3485_c0_g1	3.01071	up	3.22019e-30	basic leucine zipper 34-like [Chenopodium quinoa]
bZIP	TRINITY_DN35470_c0_g1	7.45436	up	3.61856e-07	uncharacterized protein LOC112013614 [Quercus suber]
bZIP	TRINITY_DN8445_c0_g1	4.13239	up	1.37268e-51	ABSCISIC ACID-INSENSITIVE 5-like protein 5 [Chenopodium quinoa]
bZIP	TRINITY_DN20361_c0_g1	1.96944	up	0.000191414
bZIP	TRINITY_DN21750_c0_g3	5.36236	up	0.00744259	uncharacterized protein LOC112021902 [Quercus suber]
bZIP	TRINITY_DN5760_c0_g1	2.24903	up	1.92249e-27	PREDICTED: bZIP transcription factor 11 [Beta vulgaris subsp. vulgaris]
bZIP	TRINITY_DN13702_c0_g3	6.69043	up	1.36933e-05
bZIP	TRINITY_DN13702_c1_g1	4.48475	up	0.000270275
bZIP	TRINITY_DN11511_c0_g1	-2.14902	down	2.17351e-12	PREDICTED: ABSCISIC ACID-INSENSITIVE 5-like protein 6 isoform X3 [Beta vulgaris subsp. vulgaris]
bZIP	TRINITY_DN15308_c0_g1	5.77709	up	0.00140117	PREDICTED: light-inducible protein CPRF2 [Beta vulgaris subsp. vulgaris]
bZIP	TRINITY_DN10807_c0_g1	1.50286	up	4.61517e-19	bZIP transcription factor 11-like [Spinacia oleracea]
bZIP	TRINITY_DN7732_c0_g1	1.78072	up	4.96206e-19	uncharacterized protein At4g06598-like [Chenopodium quinoa]
bZIP	TRINITY_DN1_c6_g1	1.29823	up	3.18849e-11	basic leucine zipper 61-like isoform X2 [Chenopodium quinoa]
bZIP	TRINITY_DN8832_c0_g2	6.19278	up	7.66298e-07	cross-pathway control protein A-like [Quercus suber]
bZIP	TRINITY_DN13003_c0_g1	6.59776	up	4.38246e-89	bZIP transcription factor 11-like [Chenopodium quinoa]
WRKY	TRINITY_DN22140_c0_g1	8.14941	up	2.83414e-09	probable WRKY transcription factor 40 [Chenopodium quinoa]
WRKY	TRINITY_DN13783_c0_g1	1.65547	up	3.56501e-05	WRKY transcription factor 22-like [Chenopodium quinoa]
WRKY	TRINITY_DN51555_c0_g1	4.72078	up	4.14354e-16	PREDICTED: probable WRKY transcription factor 71 [Beta vulgaris subsp. vulgaris]
WRKY	TRINITY_DN3218_c0_g1	1.16296	up	0.00190636	PREDICTED: probable WRKY transcription factor 23 [Beta vulgaris subsp. vulgaris]
WRKY	TRINITY_DN18721_c0_g1	4.53707	up	2.67829e-08	probable WRKY transcription factor 23 [Chenopodium quinoa]
WRKY	TRINITY_DN4023_c0_g1	1.87186	up	1.75875e-16	probable WRKY transcription factor 31 [Chenopodium quinoa]
WRKY	TRINITY_DN4643_c0_g1	5.28964	up	5.54949e-32	probable WRKY transcription factor 40 isoform X2 [Chenopodium quinoa]
WRKY	TRINITY_DN4396_c0_g1	3.33636	up	5.37878e-26	WRKY transcription factor WRKY24-like [Chenopodium quinoa]
WRKY	TRINITY_DN4821_c0_g1	4.74433	up	2.88853e-37	probable WRKY transcription factor 33 [Spinacia oleracea]
WRKY	TRINITY_DN64917_c0_g2	1.1334	up	8.20719e-05	PREDICTED: probable WRKY transcription factor 74 [Beta vulgaris subsp. vulgaris]
WRKY	TRINITY_DN4729_c0_g1	6.2313	up	2.48352e-09	WRKY transcription factor 22-like [Spinacia oleracea]
WRKY	TRINITY_DN33239_c0_g1	3.42559	up	1.93373e-15	PREDICTED: probable WRKY transcription factor 65 isoform X2 [Beta vulgaris subsp. vulgaris]
WRKY	TRINITY_DN3153_c0_g2	8.22686	up	7.84021e-10	PREDICTED: probable WRKY transcription factor 62 [Beta vulgaris subsp. vulgaris]
WRKY	TRINITY_DN24260_c0_g2	3.63265	up	3.01101e-05	probable WRKY transcription factor 65 [Spinacia oleracea]
WRKY	TRINITY_DN31723_c0_g1	3.06541	up	2.63354e-27	probable WRKY transcription factor 3 [Chenopodium quinoa]
WRKY	TRINITY_DN11822_c0_g1	4.56926	up	9.34117e-06	probable WRKY transcription factor 30 [Chenopodium quinoa]
WRKY	TRINITY_DN15568_c0_g1	9.48087	up	1.88349e-13	probable WRKY transcription factor 72 [Chenopodium quinoa]
WRKY	TRINITY_DN12042_c0_g1	8.20601	up	1.55783e-09	probable WRKY transcription factor 41 [Chenopodium quinoa]
FAR1	TRINITY_DN2962_c0_g1	1.70307	up	9.74368e-13	PREDICTED: putative protein FAR1-RELATED SEQUENCE 10 [Beta vulgaris subsp. vulgaris]
FAR1	TRINITY_DN5741_c0_g1	1.29158	up	7.41718e-08	protein FAR-RED IMPAIRED RESPONSE 1 [Spinacia oleracea]
FAR1	TRINITY_DN3531_c0_g1	2.16057	up	2.0832e-17	PREDICTED: protein FAR1-RELATED SEQUENCE 6-like [Beta vulgaris subsp. vulgaris]
FAR1	TRINITY_DN16303_c0_g3	-2.4041	down	2.31603e-11	PREDICTED: protein FAR1-RELATED SEQUENCE 5-like [Beta vulgaris subsp. vulgaris]
FAR1	TRINITY_DN3907_c1_g3	3.68332	up	0.00449309	protein FAR1-RELATED SEQUENCE 5-like [Chenopodium quinoa]
FAR1	TRINITY_DN12652_c0_g3	1.99441	up	1.26455e-10	protein FAR1-RELATED SEQUENCE 8-like [Chenopodium quinoa]
LOB	TRINITY_DN27604_c0_g1	6.96195	up	5.78124e-06	LOB domain-containing protein 21-like [Chenopodium quinoa]
LOB	TRINITY_DN41067_c0_g1	3.48307	up	0.00867105	PREDICTED: LOB domain-containing protein 33-like [Beta vulgaris subsp. vulgaris]
LOB	TRINITY_DN27390_c0_g2	2.46572	up	0.0499333	LOB domain-containing protein 41-like [Spinacia oleracea]
LOB	TRINITY_DN37408_c0_g1	2.95913	up	6.73883e-13	LOB domain-containing protein 15-like [Chenopodium quinoa]
LOB	TRINITY_DN3190_c0_g1	2.59205	up	4.10084e-38	PREDICTED: LOB domain-containing protein 41 [Beta vulgaris subsp. vulgaris]
LOB	TRINITY_DN12213_c0_g1	4.54165	up	0.00221301	LOB domain-containing protein 19-like [Chenopodium quinoa]
LOB	TRINITY_DN28648_c0_g1	5.11377	up	0.0424097	LOB domain-containing protein 1-like [Chenopodium quinoa]
LOB	TRINITY_DN2213_c0_g1	1.10949	up	1.90274e-05	XP_021752641.1LOB domain-containing protein 36-like [Chenopodium quinoa]
C2C2	TRINITY_DN2345_c0_g1	2.23794	up	1.96883e-10	YABBY family protein [Bienertia sinuspersici]
C2C2	TRINITY_DN8431_c0_g1	1.90125	up	9.17579e-20	axial regulator YABBY 5 [Spinacia oleracea]
C2C2	TRINITY_DN8431_c0_g2	2.47969	up	1.44694e-09	YABBY family protein [Bienertia sinuspersici]
GRAS	TRINITY_DN1748_c0_g1	1.59647	up	1.87678e-16	scarecrow-like protein 1 [Chenopodium quinoa]
GRAS	TRINITY_DN29143_c0_g1	-1.2204	up	4.09234e-10	LOW QUALITY PROTEIN: scarecrow-like protein 4 [Chenopodium quinoa]
GRAS	TRINITY_DN7660_c0_g1	-1.42103	down	3.13317e-10	scarecrow-like protein 21 isoform X1 [Chenopodium quinoa]
GRAS	TRINITY_DN33740_c0_g1	1.46943	up	5.96063e-06	PREDICTED: scarecrow-like protein 21 [Beta vulgaris subsp. vulgaris]
GRAS	TRINITY_DN33010_c0_g1	2.88159	up	3.72368e-14	PREDICTED: protein SHORT-ROOT [Beta vulgaris subsp. vulgaris]
GRAS	TRINITY_DN3196_c0_g1	3.49869	up	6.85809e-46	PREDICTED: scarecrow-like protein 8 [Beta vulgaris subsp. vulgaris]
GRAS	TRINITY_DN9193_c0_g1	1.48003	up	1.21184e-12	PREDICTED: scarecrow-like protein 34 [Beta vulgaris subsp. vulgaris]
GRAS	TRINITY_DN1094_c2_g1	1.24844	up	3.78035e-06	protein SHORT-ROOT [Spinacia oleracea]
GRAS	TRINITY_DN1945_c0_g1	-1.51164	down	8.29454e-07	scarecrow-like protein 3 [Pistacia vera]
GRAS	TRINITY_DN10765_c0_g1	2.98357	up	0.0166172	PREDICTED: scarecrow-like protein 28 [Beta vulgaris subsp. vulgaris]
GRAS	TRINITY_DN24469_c0_g1	1.11778	up	2.88967e-06	scarecrow-like protein 33 [Chenopodium quinoa]
GRAS	TRINITY_DN35924_c0_g1	2.28494	up	0.00548428	scarecrow-like protein 32 [Chenopodium quinoa]
GRAS	TRINITY_DN6441_c0_g1	1.53615	up	8.15807e-16	scarecrow-like protein 6 [Spinacia oleracea]
NAC	TRINITY_DN8225_c0_g2	-1.5914	down	2.79132e-20	NAC transcription factor [Suaeda liaotungensis]
NAC	TRINITY_DN15044_c0_g1	3.78192	up	4.93457e-28	NAC domain-containing protein 83-like [Chenopodium quinoa]
NAC	TRINITY_DN35432_c0_g1	3.51129	up	2.97204e-29	NAC domain-containing protein 100-like [Chenopodium quinoa]
NAC	TRINITY_DN10162_c0_g1	1.3173	up	0.0182231	PREDICTED: NAC domain-containing protein 35 isoform X1 [Beta vulgaris subsp. vulgaris]
NAC	TRINITY_DN18567_c0_g2	3.23644	up	1.17489e-07	NAC transcription factor [Suaeda liaotungensis]
NAC	TRINITY_DN7999_c0_g1	1.23865	up	5.71883e-14	NAC-like protein 2 [Suaeda liaotungensis]
NAC	TRINITY_DN2605_c0_g1	2.57328	up	6.86398e-10	NAC transcription factor 25 [Haloxylon ammodendron]
NAC	TRINITY_DN17243_c0_g1	1.51471	up	0.0255849	NAC domain-containing protein 37-like [Chenopodium quinoa]
NAC	TRINITY_DN11512_c0_g1	1.26984	up	0.0070712	PREDICTED: NAC domain-containing protein 35 [Beta vulgaris subsp. vulgaris]
NAC	TRINITY_DN30625_c0_g1	-3.09918	down	1.15225e-26	NAC domain-containing protein 89-like [Chenopodium quinoa]
NAC	TRINITY_DN30625_c0_g2	-2.74416	down	2.45705e-12	PREDICTED: NAC domain-containing protein 40 isoform X2 [Beta vulgaris subsp. vulgaris]
NAC	TRINITY_DN30625_c0_g3	-2.46683	down	0.00232428	NAC domain-containing protein 40-like [Chenopodium quinoa]
NAC	TRINITY_DN3176_c0_g1	3.06801	up	1.04274e-19	NAC transcription factor 29-like [Chenopodium quinoa]
NAC	TRINITY_DN60175_c0_g2	2.35189	up	0.00154882	PREDICTED: protein CUP-SHAPED COTYLEDON 1 [Beta vulgaris subsp. vulgaris]
NAC	TRINITY_DN256_c0_g2	-2.00353	down	9.88205e-32	PREDICTED: NAC domain-containing protein 82 [Beta vulgaris subsp. vulgaris]
Nin-like	TRINITY_DN1810_c0_g2	-1.80535	down	4.39436e-19	PREDICTED: protein NLP9 [Beta vulgaris subsp. vulgaris]
Nin-like	TRINITY_DN16432_c0_g1	3.17536	up	1.32741e-09	protein NLP2-like [Chenopodium quinoa]
Nin-like	TRINITY_DN12044_c0_g1	-2.74661	down	3.08346e-06	PREDICTED: protein NLP7 [Beta vulgaris subsp. vulgaris]
NF-Y	TRINITY_DN16220_c0_g2	3.49687	up	0.00468292	transcriptional activator HAP2-like [Quercus suber]
NF-Y	TRINITY_DN8871_c0_g1	2.16567	up	8.0844e-13	PREDICTED: nuclear transcription factor Y subunit A-3 [Beta vulgaris subsp. vulgaris]
NF-Y	TRINITY_DN599_c0_g1	-1.64118	down	3.90536e-12	PREDICTED: nuclear transcription factor Y subunit A-1 [Beta vulgaris subsp. vulgaris]
GRF	TRINITY_DN2908_c0_g1	1.62772	up	0.00772118	growth-regulating factor 1-like [Chenopodium quinoa]
GRF	TRINITY_DN25632_c0_g1	2.33448	up	6.9964e-06	uncharacterized protein LOC110721401 [Chenopodium quinoa]
GRF	TRINITY_DN1562_c0_g2	-2.1624	down	1.5722e-22	growth-regulating factor 2-like [Chenopodium quinoa]
GRF	TRINITY_DN20385_c0_g1	1.6033	up	7.66156e-16	growth-regulating factor 5-like isoform X2 [Chenopodium quinoa]
GRF	TRINITY_DN2271_c0_g1	-1.04278	down	2.17409e-05	growth-regulating factor 5-like [Chenopodium quinoa]
BBR-BPC	TRINITY_DN9257_c0_g1	2.30923	up	5.37206e-13	PREDICTED: protein BASIC PENTACYSTEINE7 [Beta vulgaris subsp. vulgaris]
C2C2	TRINITY_DN908_c0_g2	6.95271	up	4.6366e-152	protein LOL1 isoform X2 [Prosopis alba]
CPP	TRINITY_DN14622_c0_g1	1.95284	up	7.43861e-08	protein tesmin/TSO1-like CXC 5 [Spinacia oleracea]
CPP	TRINITY_DN20969_c0_g1	1.17551	up	0.0046812	LOW QUALITY PROTEIN: protein tesmin/TSO1-like CXC 3 [Chenopodium quinoa]
CPP	TRINITY_DN11732_c0_g1	1.40809	up	4.11406e-06	protein tesmin/TSO1-like CXC 2 [Spinacia oleracea]
C2C2	TRINITY_DN25198_c0_g2	-2.25154	down	4.78655e-15	PREDICTED: B-box zinc finger protein 32 [Beta vulgaris subsp. vulgaris]
C2C2	TRINITY_DN6930_c0_g1	3.14022	up	6.15105e-35	zinc finger protein CONSTANS-LIKE 6-like isoform X1 [Chenopodium quinoa]
C2C2	TRINITY_DN10696_c0_g1	7.82069	up	2.09477e-33	PREDICTED: B-box zinc finger protein 20 [Beta vulgaris subsp. vulgaris]
C2C2	TRINITY_DN5095_c0_g1	7.70469	up	1.77832e-16	PREDICTED: B-box zinc finger protein 32 [Beta vulgaris subsp. vulgaris]
C2C2	TRINITY_DN1577_c0_g1	2.57546	up	9.87447e-30	PREDICTED: B-box zinc finger protein 20 [Beta vulgaris subsp. vulgaris]
C2C2	TRINITY_DN4901_c0_g1	6.02267	up	1.0461e-40	zinc finger protein CONSTANS-LIKE 6-like [Chenopodium quinoa]
C2C2	TRINITY_DN7218_c0_g1	-1.40985	down	8.49338e-18	B-box zinc finger protein 22-like [Chenopodium quinoa]
C2C2	TRINITY_DN6028_c0_g2	1.17021	up	1.20118e-06	zinc finger protein CONSTANS-LIKE 4 [Spinacia oleracea]
ZF-HD	TRINITY_DN10384_c0_g1	2.7979	up	2.03611e-09	PREDICTED: mini zinc finger protein 1 [Beta vulgaris subsp. vulgaris]
ZF-HD	TRINITY_DN5655_c0_g1	1.28369	up	3.51723e-08	zinc-finger homeodomain protein 6-like [Chenopodium quinoa]
ZF-HD	TRINITY_DN5575_c0_g1	2.25532	up	7.48677e-07	PREDICTED: zinc-finger homeodomain protein 3 [Beta vulgaris subsp. vulgaris]
ZF-HD	TRINITY_DN233_c0_g1	1.11013	up	1.80488e-07	zinc-finger homeodomain protein 1-like [Spinacia oleracea]
NF-X1	TRINITY_DN35905_c0_g1	-1.86226	down	2.82112e-27	NF-X1-type zinc finger protein NFXL1-like [Chenopodium quinoa]
EIL	TRINITY_DN1879_c0_g2	-2.82546	up	1.40632e-36	PREDICTED: ETHYLENE INSENSITIVE 3-like 1 protein [Beta vulgaris subsp. vulgaris]
EIL	TRINITY_DN12758_c0_g1	-1.57643	down	4.55089e-06	putative ETHYLENE INSENSITIVE 3-like 4 protein [Chenopodium quinoa]
Transcription factors in the SlG_C vs SlG_N group
B3_superfamily	TRINITY_DN3309_c0_g1	-1.14522	down	0.0141915	hypothetical protein BVRB_2g045220 [Beta vulgaris subsp. vulgaris]
B3_superfamily	TRINITY_DN32173_c0_g1	2.04602	up	8.76247e-05	PREDICTED: putative AP2/ERF and B3 domain-containing protein Os01g0140700 [Beta vulgaris subsp. vulgaris]
B3_superfamily	TRINITY_DN19891_c0_g1	-1.52159	down	0.000178008	B3 domain-containing protein REM9-like [Chenopodium quinoa]
B3_superfamily	TRINITY_DN26339_c0_g1	1.4076	up	0.0186465	B3 domain-containing protein Os03g0212300-like [Chenopodium quinoa]
C2H2	TRINITY_DN69161_c0_g1	-3.38233	down	2.73729e-06	C2H2 finger domain transcription factor crzA-like [Quercus suber]
AP2/ERF	TRINITY_DN23862_c0_g1	-1.36039	down	0.00987458	ethylene-responsive transcription factor ERF110-like [Chenopodium quinoa]
AP2/ERF	TRINITY_DN8900_c0_g2	-1.19474	down	0.0114714	PREDICTED: ethylene-responsive transcription factor ERF113 isoform X2 [Beta vulgaris subsp. vulgaris]
AP2/ERF	TRINITY_DN9523_c0_g1	3.03772	up	6.39617e-15	PREDICTED: ethylene-responsive transcription factor ERF003 [Beta vulgaris subsp. vulgaris]
MYB_superfamily	TRINITY_DN5919_c0_g1	-1.18366	down	0.000285693	transcription factor MYB14-like [Chenopodium quinoa]
LBD (AS2/LOB)	TRINITY_DN8056_c0_g1	1.37223	up	2.81131e-05	homeobox-leucine zipper protein ATHB-12-like [Chenopodium quinoa]
HSF	TRINITY_DN2888_c0_g1	1.7304	up	0.00148452	heat stress transcription factor B-4-like [Chenopodium quinoa]
NAC	TRINITY_DN7999_c0_g1	1.26504	up	3.83972e-07	NAC-like protein 2 [Suaeda liaotungensis]
GRF	TRINITY_DN25632_c0_g1	1.34875	up	0.0011787	uncharacterized protein LOC110721401 [Chenopodium quinoa]
C2C2	TRINITY_DN4901_c0_g1	1.64724	up	5.81269e-07	zinc finger protein CONSTANS-LIKE 6-like [Chenopodium quinoa]

## Sheet: Table S5
Table S5. A list of DEGs involved in plant hormone signal transduction in the SlD vs SlG_C and SlG_C vs SlG_N groups.
"up": respresents up-regulation of gene expression, "down":respresents down-regulation of gene expression (|log2 FC| ≥ 1, Padj -value< 0.05).
FC:Fold change of gene expression level.
Category	Gene ID	log2 FC	Regulate	Padj-value	NR Description
plant hormone signaling pathway in the SlD vs SlG_C group
Auxin	TRINITY_DN13851_c1_g1	7.76195	up	1.12047e-11	PREDICTED: auxin transporter-like protein 3 [Beta vulgaris subsp. vulgaris]
Auxin	TRINITY_DN13851_c0_g1	3.02276	up	1.44791e-16	auxin transporter-like protein 2 [Chenopodium quinoa]
Auxin	TRINITY_DN2508_c0_g1	1.6124	up	8.10729e-08	PREDICTED: auxin transporter-like protein 2 [Beta vulgaris subsp. vulgaris]
Auxin	TRINITY_DN5938_c0_g1	3.32443	up	9.81071e-25	IAA7 [Bassia scoparia]
Auxin	TRINITY_DN18466_c0_g1	1.04352	up	1.72822e-07	IAA8 [Bassia scoparia]
Auxin	TRINITY_DN535_c0_g1	3.43296	up	6.96162e-19	auxin response factor 11 [Spinacia oleracea]
Auxin	TRINITY_DN1721_c0_g2	1.79089	up	6.66915e-06	auxin-responsive protein IAA4-like [Chenopodium quinoa]
Auxin	TRINITY_DN1721_c0_g1	6.6498	up	1.29438e-112	IAA3 [Bassia scoparia]
Auxin	TRINITY_DN3445_c0_g1	1.30472	up	1.06958e-13	auxin-responsive protein IAA9-like [Chenopodium quinoa]
Auxin	TRINITY_DN212_c0_g1	3.1478	up	1.5282e-81	auxin-responsive protein IAA26-like [Chenopodium quinoa]
Auxin	TRINITY_DN6678_c0_g1	1.58313	up	0.0296648	auxin-responsive protein IAA31-like [Chenopodium quinoa]
Auxin	TRINITY_DN45047_c0_g2	2.25263	up	4.7591e-05	auxin-induced protein IAA6-like [Chenopodium quinoa]
Auxin	TRINITY_DN1147_c0_g1	1.9067	up	1.12367e-20	auxin-responsive protein IAA14-like [Chenopodium quinoa]
Auxin	TRINITY_DN4179_c0_g1	8.11706	up	1.99393e-12	probable indole-3-acetic acid-amido synthetase GH3.1 [Chenopodium quinoa]
Auxin	TRINITY_DN3636_c0_g1	2.04517	up	8.42935e-24	indole-3-acetic acid-amido synthetase GH3.5-like [Chenopodium quinoa]
Auxin	TRINITY_DN8198_c0_g1	1.87079	up	6.07169e-06	auxin-responsive protein SAUR72-like [Spinacia oleracea]
Auxin	TRINITY_DN43386_c0_g1	4.88043	up	0.0326471	auxin-responsive protein SAUR21-like [Cucurbita moschata]
Auxin	TRINITY_DN5674_c0_g1	4.05217	up	3.20004e-06	auxin-responsive protein SAUR36-like [Chenopodium quinoa]
Auxin	TRINITY_DN60157_c0_g1	6.29894	up	0.000151269	auxin-responsive protein SAUR19-like [Spinacia oleracea]
Auxin	TRINITY_DN13763_c1_g1	4.50667	up	3.33976e-33	PREDICTED: auxin-responsive protein SAUR21-like [Beta vulgaris subsp. vulgaris]
Auxin	TRINITY_DN13763_c0_g1	5.11552	up	8.93343e-39	auxin-responsive protein SAUR21-like [Spinacia oleracea]
Auxin	TRINITY_DN8457_c0_g1	3.44487	up	0.000326052	PREDICTED: auxin-responsive protein SAUR50-like [Beta vulgaris subsp. vulgaris]
Auxin	TRINITY_DN8032_c0_g2	4.97371	up	3.71812e-26	auxin-induced protein 10A5-like [Chenopodium quinoa]
Auxin	TRINITY_DN11895_c0_g1	6.86996	up	8.59542e-09	auxin-induced protein 10A5-like [Chenopodium quinoa]
Auxin	TRINITY_DN6707_c0_g1	6.86271	up	2.52395e-05	auxin-induced protein 15A-like [Chenopodium quinoa]
Auxin	TRINITY_DN6546_c0_g3	6.10932	up	3.74141e-62	PREDICTED: uncharacterized protein LOC104908675 [Beta vulgaris subsp. vulgaris]
Auxin	TRINITY_DN3336_c0_g1	3.26662	up	3.10096e-07	hypothetical protein SOVF_051540 [Spinacia oleracea]
Auxin	TRINITY_DN38083_c0_g1	6.47889	up	1.6502e-53	hypothetical protein SOVF_098920 [Spinacia oleracea]
Auxin	TRINITY_DN5635_c0_g1	3.70125	up	1.61554e-32	hypothetical protein SOVF_098930 [Spinacia oleracea]
Auxin	TRINITY_DN42219_c0_g1	3.73701	up	4.87212e-19	hypothetical protein BVRB_000330 [Beta vulgaris subsp. vulgaris]
Auxin	TRINITY_DN16888_c0_g1	5.00767	up	0.000505216	hypothetical protein BVRB_1g001190 [Beta vulgaris subsp. vulgaris]
Auxin	TRINITY_DN8761_c0_g1	2.21524	up	1.48366e-08	hypothetical protein SOVF_098920 [Spinacia oleracea]
Cytokinin	TRINITY_DN1297_c0_g1	2.32416	up	1.57261e-36	histidine kinase 2-like [Chenopodium quinoa]
Cytokinin	TRINITY_DN5219_c0_g1	4.42843	up	1.59929e-07	two-component response regulator ORR9-like isoform X1 [Chenopodium quinoa]
Cytokinin	TRINITY_DN12285_c1_g1	4.10112	up	4.60147e-22	two-component response regulator ORR10-like [Spinacia oleracea]
Cytokinin	TRINITY_DN6338_c0_g1	1.26368	up	7.12426e-06	two-component response regulator ORR10-like [Spinacia oleracea]
Cytokinin	TRINITY_DN4112_c0_g1	2.60946	up	1.80648e-19	PREDICTED: two-component response regulator ARR6 isoform X2 [Beta vulgaris subsp. vulgaris]
Cytokinin	TRINITY_DN10775_c0_g1	2.73611	up	3.52e-10	PREDICTED: two-component response regulator ORR9 [Beta vulgaris subsp. vulgaris]
Cytokinin	TRINITY_DN32632_c0_g1	4.69338	up	3.47069e-18	two-component response regulator ORR9-like [Spinacia oleracea]
Gibberellin	TRINITY_DN41048_c0_g1	5.86807	up	2.14232e-08	PREDICTED: transcription factor APG-like [Beta vulgaris subsp. vulgaris]
Abscisic acid	TRINITY_DN2817_c0_g1	2.80439	up	1.39404e-22	abscisic acid receptor PYL8-like [Chenopodium quinoa]
Abscisic acid	TRINITY_DN3819_c0_g1	-1.99266	down	6.21944e-07	abscisic acid receptor PYL12-like [Spinacia oleracea]
Abscisic acid	TRINITY_DN2045_c0_g2	4.63271	up	4.84853e-59	PREDICTED: abscisic acid receptor PYR1 [Beta vulgaris subsp. vulgaris]
Abscisic acid	TRINITY_DN8430_c0_g1	9.85096	up	1.28419e-19	abscisic acid receptor PYL4-like [Chenopodium quinoa]
Abscisic acid	TRINITY_DN12696_c0_g1	4.58847	up	4.28862e-106	abscisic acid receptor PYL4-like [Chenopodium quinoa]
Abscisic acid	TRINITY_DN1864_c0_g2	3.00913	up	5.91699e-13	abscisic acid receptor PYL2-like [Chenopodium quinoa]
Abscisic acid	TRINITY_DN5384_c0_g1	-1.77629	down	7.49774e-26	protein phosphatase 2C 37-like [Chenopodium quinoa]
Abscisic acid	TRINITY_DN14553_c0_g1	-5.69857	down	1.33329e-05	probable protein phosphata
Abscisic acid	TRINITY_DN32254_c0_g2	-3.54845	down	5.53477e-05	probable protein phosphatase 2C 8 isoform X2 [Chenopodium quinoa]
Abscisic acid	TRINITY_DN32254_c0_g1	-2.65075	down	8.3004e-14	PREDICTED: probable protein phosphatase 2C 8 isoform X1 [Beta vulgaris subsp. vulgaris]
Abscisic acid	TRINITY_DN52120_c0_g1	-1.88988	down	2.6746e-15	probable protein phosphatase 2C 6 [Chenopodium quinoa]
Abscisic acid	TRINITY_DN1797_c0_g1	-2.74286	down	4.69874e-13	probable protein phosphatase 2C 8 [Chenopodium quinoa]
Abscisic acid	TRINITY_DN6630_c0_g1	-3.78435	down	2.0817e-29	probable protein phosphatase 2C 24 isoform X2 [Chenopodium quinoa]
Abscisic acid	TRINITY_DN41126_c0_g1	2.06818	up	0.000320099	uncharacterized protein LOC110711509 [Chenopodium quinoa]
Abscisic acid	TRINITY_DN13392_c0_g1	-2.65302	down	9.91868e-24	serine/threonine-protein kinase SAPK10 isoform X2 [Vitis riparia]
Abscisic acid	TRINITY_DN14774_c0_g1	-1.57647	down	1.63505e-20	PREDICTED: serine/threonine-protein kinase SRK2I [Beta vulgaris subsp. vulgaris]
Abscisic acid	TRINITY_DN14774_c0_g2	-1.57509	down	0.0168868	PREDICTED: serine/threonine-protein kinase SRK2I [Beta vulgaris subsp. vulgaris]
Abscisic acid	TRINITY_DN3093_c0_g1	-2.57935	down	4.90469e-33	protein ABSCISIC ACID-INSENSITIVE 5-like isoform X1 [Chenopodium quinoa]
Abscisic acid	TRINITY_DN15636_c0_g1	-3.41876	down	2.95042e-05	protein ABSCISIC ACID-INSENSITIVE 5-like isoform X1 [Chenopodium quinoa]
Abscisic acid	TRINITY_DN11511_c0_g1	-2.14902	down	2.17351e-12	PREDICTED: ABSCISIC ACID-INSENSITIVE 5-like protein 6 isoform X3 [Beta vulgaris subsp. vulgaris]
Abscisic acid	TRINITY_DN8445_c0_g1	4.13239	up	1.37268e-51	ABSCISIC ACID-INSENSITIVE 5-like protein 5 [Chenopodium quinoa]
Ethylene	TRINITY_DN147_c0_g1	2.41878	up	6.84135e-40	probable ethylene response sensor 1 [Chenopodium quinoa]
Ethylene	TRINITY_DN277_c0_g1	2.17245	up	2.3651e-31	ethylene receptor 2-like [Spinacia oleracea]
Ethylene	TRINITY_DN10788_c0_g1	-1.37199	down	3.75921e-16	ethylene receptor-like [Chenopodium quinoa]
Ethylene	TRINITY_DN16921_c0_g1	1.38506	up	5.80067e-11	PREDICTED: EIN3-binding F-box protein 2 [Beta vulgaris subsp. vulgaris]
Ethylene	TRINITY_DN1879_c0_g2	-2.82546	down	1.40632e-36	PREDICTED: ETHYLENE INSENSITIVE 3-like 1 protein [Beta vulgaris subsp. vulgaris]
Ethylene	TRINITY_DN12758_c0_g1	-1.57643	down	4.55089e-06	putative ETHYLENE INSENSITIVE 3-like 4 protein [Chenopodium quinoa]
Ethylene	TRINITY_DN13483_c0_g1	2.16803	up	0.000548432	ethylene-responsive transcription factor 1B-like [Chenopodium quinoa]
Ethylene	TRINITY_DN14695_c0_g1	4.7352	up	6.36519e-08	ethylene-responsive transcription factor 1B-like [Chenopodium quinoa]
Brassinosteriod	TRINITY_DN2597_c0_g1	1.14995	up	2.47307e-11	PREDICTED: BRASSINOSTEROID INSENSITIVE 1-associated receptor kinase 1-like [Beta vulgaris subsp. vulgaris]
Brassinosteriod	TRINITY_DN9652_c0_g1	1.54807	up	0.00401706	PREDICTED: BRASSINOSTEROID INSENSITIVE 1-associated receptor kinase 1 [Beta vulgaris subsp. vulgaris]
Brassinosteriod	TRINITY_DN6168_c2_g4	1.18784	up	0.000387862	PREDICTED: BRASSINOSTEROID INSENSITIVE 1-associated receptor kinase 1 [Beta vulgaris subsp. vulgaris]
Brassinosteriod	TRINITY_DN21636_c0_g4	1.26049	up	5.62153e-09	systemin receptor SR160 [Spinacia oleracea]
Brassinosteriod	TRINITY_DN226_c1_g2	-4.73404	down	3.99936e-08	hypothetical protein Pyn_31954 [Prunus yedoensis var. nudiflora]
Brassinosteriod	TRINITY_DN26754_c0_g1	-1.74364	down	0.00907958	putative serine/threonine-protein kinase BSK3 isoform X2 [Cinnamomum micranthum f. kanehirae]
Brassinosteriod	TRINITY_DN1139_c0_g1	1.12562	up	2.23206e-08	PREDICTED: probable serine/threonine-protein kinase At4g35230 [Beta vulgaris subsp. vulgaris]
Brassinosteriod	TRINITY_DN4215_c0_g1	4.7118	up	5.95602e-56	PREDICTED: probable xyloglucan endotransglucosylase/hydrolase protein 23 [Beta vulgaris subsp. vulgaris]
Brassinosteriod	TRINITY_DN6994_c0_g1	7.40511	up	3.05204e-161	probable xyloglucan endotransglucosylase/hydrolase protein 23 [Chenopodium quinoa]
Brassinosteriod	TRINITY_DN6994_c0_g2	5.21756	up	9.47249e-78	probable xyloglucan endotransglucosylase/hydrolase protein 23 [Chenopodium quinoa]
Brassinosteriod	TRINITY_DN40587_c0_g1	6.14935	up	0.000298756	probable xyloglucan endotransglucosylase/hydrolase protein 23 [Chenopodium quinoa]
Brassinosteriod	TRINITY_DN1652_c0_g1	-4.20908	down	3.68752e-09	probable xyloglucan endotransglucosylase/hydrolase protein 25 [Spinacia oleracea]
Brassinosteriod	TRINITY_DN40370_c0_g2	3.57316	up	3.32726e-84	hypothetical protein SOVF_173740 [Spinacia oleracea]
Brassinosteriod	TRINITY_DN5705_c0_g1	2.2719	up	7.74516e-15	probable xyloglucan endotransglucosylase/hydrolase protein 23 isoform X1 [Spinacia oleracea]
Brassinosteriod	TRINITY_DN14941_c0_g1	2.84815	up	3.40653e-06	hypothetical protein SOVF_037320 [Spinacia oleracea]
Brassinosteriod	TRINITY_DN7272_c1_g1	4.98352	up	0.0256733	probable xyloglucan endotransglucosylase/hydrolase protein 23 [Chenopodium quinoa]
Brassinosteriod	TRINITY_DN7272_c0_g2	6.5787	up	3.65208e-05	PREDICTED: probable xyloglucan endotransglucosylase/hydrolase protein 23 [Beta vulgaris subsp. vulgaris]
Brassinosteriod	TRINITY_DN15695_c0_g1	-1.94294	down	0.00130891	cyclin-D3-1-like [Chenopodium quinoa]
Brassinosteriod	TRINITY_DN9610_c0_g1	3.51144	up	1.57834e-11	PREDICTED: cyclin-D3-1 [Beta vulgaris subsp. vulgaris]
Jasmonic acid	TRINITY_DN32088_c0_g1	-1.23389	down	2.39886e-13	PREDICTED: jasmonic acid-amido synthetase JAR1 [Beta vulgaris subsp. vulgaris]
Jasmonic acid	TRINITY_DN13813_c0_g1	3.23522	up	1.02386e-16	PREDICTED: protein TIFY 10A-like [Beta vulgaris subsp. vulgaris]
Jasmonic acid	TRINITY_DN50870_c0_g1	4.42102	up	4.19068e-92	protein TIFY 6B-like [Chenopodium quinoa]
Jasmonic acid	TRINITY_DN4979_c0_g1	1.23854	up	5.17291e-09	PREDICTED: protein TIFY 10b [Beta vulgaris subsp. vulgaris]
Jasmonic acid	TRINITY_DN2048_c0_g1	3.51792	up	4.94735e-54	transcription factor MYC2-like [Chenopodium quinoa]
Salicylic acid	TRINITY_DN3516_c0_g2	1.71238	up	5.60042e-20	PREDICTED: regulatory protein NPR5 [Beta vulgaris subsp. vulgaris]
Salicylic acid	TRINITY_DN5581_c0_g1	1.25235	up	0.000526326	transcription factor TGA7-like [Spinacia oleracea]
Salicylic acid	TRINITY_DN9367_c0_g1	3.02763	up	0.00014284	transcription factor TGA9-like isoform X2 [Chenopodium quinoa]
Salicylic acid	TRINITY_DN16291_c0_g1	-1.46374	down	0.000270966	bZIP transcription factor TGA10-like [Chenopodium quinoa]
Salicylic acid	TRINITY_DN8101_c0_g1	3.68962	up	5.98938e-14	PREDICTED: pathogenesis-related protein 1B [Beta vulgaris subsp. vulgaris]
Salicylic acid	TRINITY_DN50836_c0_g1	5.92168	up	0.000890222	pathogenesis-related protein PR-1 type-like [Spinacia oleracea]
Salicylic acid	TRINITY_DN8422_c0_g1	3.25246	up	4.52541e-18	pathogenesis-related protein PR-1-like [Chenopodium quinoa]
Salicylic acid	TRINITY_DN10029_c0_g1	8.09662	up	9.49893e-08	pathogenesis-related protein PR-1 type-like [Spinacia oleracea]
Salicylic acid	TRINITY_DN10029_c0_g2	9.22665	up	1.72298e-12	PREDICTED: pathogenesis-related protein 1C-like [Beta vulgaris subsp. vulgaris]
plant hormone signaling pathway in the SlG_C vs SlG_N group
Abscisic acid	TRINITY_DN8430_c0_g1	-1.04651	down	0.000213552	abscisic acid receptor PYL4-like
Abscisic acid	TRINITY_DN52120_c0_g1	1.43574	up	0.004226	probable protein phosphatase 2C 6
Abscisic acid	TRINITY_DN9449_c0_g1	1.22477	up	0.00965956	uncharacterized protein LOC104889617
Cytokinin	TRINITY_DN32632_c0_g1	-1.06969	down	0.0194469	two-component response regulator ORR9-like
Brassinosteriod	TRINITY_DN40370_c0_g1	-1.62421	down	4.58e-12	Xyloglucan endotransglucosylase/hydrolase 2-like
Brassinosteriod	TRINITY_DN6994_c0_g2	-1.62854	down	8.83e-06	probable xyloglucan endotransglucosylase/hydrolase protein 23
Brassinosteriod	TRINITY_DN6994_c0_g1	-1.30165	down	0.000740594	probable xyloglucan endotransglucosylase/hydrolase protein 23
Brassinosteriod	TRINITY_DN4215_c0_g1	-2.38173	down	2.41e-20	probable xyloglucan endotransglucosylase/hydrolase protein 23
Brassinosteriod	TRINITY_DN12138_c0_g1	2.11743	up	0.000137847	BRI1 kinase inhibitor 1-like

## Sheet: Table S6
Table S6. A list of DEGs involved in reactive oxygen species metabolic process in the SlD vs SlG_C and SlG_C vs SlG_N groups.
"up": respresents up-regulation of gene expression, "down":respresents down-regulation of gene expression (|log2 FC| ≥ 1, Padj -value< 0.05).
FC:Fold change of gene expression level.
Category	Gene ID	log2 FC	Regulate	Padj-value	NR Description
reactive oxygen species metabolic process in the SlD vs SlG_C group
reactive oxygen species metabolic	TRINITY_DN11002_c0_g1	3.76079	up	2.56e-61	PREDICTED: peroxidase 3 [Beta vulgaris subsp. vulgaris]
reactive oxygen species metabolic	TRINITY_DN6051_c0_g1	9.26263	up	2.01e-12	peroxidase 4-like [Spinacia oleracea]
reactive oxygen species metabolic	TRINITY_DN4367_c0_g1	7.73062	up	3.55e-08	PREDICTED: peroxidase 5-like [Beta vulgaris subsp. vulgaris]
reactive oxygen species metabolic	TRINITY_DN16685_c0_g1	4.28797	up	3.69e-05	peroxidase 5-like [Chenopodium quinoa]
reactive oxygen species metabolic	TRINITY_DN81176_c0_g1	7.42405	up	1.17e-10	peroxidase 5-like [Spinacia oleracea]
reactive oxygen species metabolic	TRINITY_DN24152_c0_g2	-4.57438	down	0.00366148	peroxidase 5-like [Chenopodium quinoa]
reactive oxygen species metabolic	TRINITY_DN10246_c0_g1	6.39637	up	7.4e-05	peroxidase 5-like [Chenopodium quinoa]
reactive oxygen species metabolic	TRINITY_DN29303_c0_g1	9.75043	up	1.76e-36	peroxidase P7-like [Chenopodium quinoa]
reactive oxygen species metabolic	TRINITY_DN46441_c0_g1	7.99588	up	6.91e-44	peroxidase P7-like [Chenopodium quinoa]
reactive oxygen species metabolic	TRINITY_DN20079_c0_g1	5.38039	up	0.00964502	peroxidase P7-like [Chenopodium quinoa]
reactive oxygen species metabolic	TRINITY_DN18244_c0_g1	6.25341	up	1.4e-10	PREDICTED: peroxidase P7 [Beta vulgaris subsp. vulgaris]
reactive oxygen species metabolic	TRINITY_DN10166_c0_g1	1.13383	up	3.83e-07	PREDICTED: peroxidase P7 [Beta vulgaris subsp. vulgaris]
reactive oxygen species metabolic	TRINITY_DN3401_c0_g1	10.9254	up	1.21e-16	peroxidase P7-like [Spinacia oleracea]
reactive oxygen species metabolic	TRINITY_DN1769_c0_g1	10.3318	up	4.78e-21	PREDICTED: peroxidase P7-like [Beta vulgaris subsp. vulgaris]
reactive oxygen species metabolic	TRINITY_DN22759_c0_g1	5.66884	up	8.91e-142	PREDICTED: peroxidase P7-like [Beta vulgaris subsp. vulgaris]
reactive oxygen species metabolic	TRINITY_DN12167_c0_g1	2.71784	up	1.02e-47	PREDICTED: peroxidase P7-like [Beta vulgaris subsp. vulgaris]
reactive oxygen species metabolic	TRINITY_DN9620_c0_g1	7.39939	up	2.23e-07	PREDICTED: peroxidase 12 [Beta vulgaris subsp. vulgaris]
reactive oxygen species metabolic	TRINITY_DN5883_c0_g1	1.91069	up	0.0490156	peroxidase 12-like [Chenopodium quinoa]
reactive oxygen species metabolic	TRINITY_DN5578_c0_g1	3.67764	up	3.96e-59	PREDICTED: peroxidase 16 [Beta vulgaris subsp. vulgaris]
reactive oxygen species metabolic	TRINITY_DN6780_c0_g1	2.61273	up	2.93e-22	PREDICTED: peroxidase 17 [Beta vulgaris subsp. vulgaris]
reactive oxygen species metabolic	TRINITY_DN10442_c0_g1	3.34582	up	4.2e-10	peroxidase 19-like [Chenopodium quinoa]
reactive oxygen species metabolic	TRINITY_DN46405_c0_g1	7.8296	up	4.22e-09	peroxidase 25 [Chenopodium quinoa]
reactive oxygen species metabolic	TRINITY_DN6709_c0_g2	7.30617	up	5.37e-10	probable peroxidase 26 [Spinacia oleracea]
reactive oxygen species metabolic	TRINITY_DN17466_c0_g1	-3.24293	down	3.59e-11	peroxidase 27-like [Chenopodium quinoa]
reactive oxygen species metabolic	TRINITY_DN3966_c0_g2	5.38373	up	0.000841412	peroxidase 27-like [Chenopodium quinoa]
reactive oxygen species metabolic	TRINITY_DN3966_c0_g1	10.9079	up	1.07e-17	peroxidase 27-like [Chenopodium quinoa]
reactive oxygen species metabolic	TRINITY_DN38751_c0_g1	7.24743	up	2.3e-06	peroxidase 27-like [Chenopodium quinoa]
reactive oxygen species metabolic	TRINITY_DN12158_c0_g5	9.7541	up	6.36e-14	PREDICTED: peroxidase 27-like [Beta vulgaris subsp. vulgaris]
reactive oxygen species metabolic	TRINITY_DN12158_c1_g1	6.55132	up	9.54e-05	PREDICTED: peroxidase 27-like [Beta vulgaris subsp. vulgaris]
reactive oxygen species metabolic	TRINITY_DN81536_c0_g1	6.90672	up	1.69e-05	PREDICTED: peroxidase 27 [Beta vulgaris subsp. vulgaris]
reactive oxygen species metabolic	TRINITY_DN2118_c0_g2	3.82736	up	1.43e-32	peroxidase 31-like [Spinacia oleracea]
reactive oxygen species metabolic	TRINITY_DN2118_c0_g1	3.47376	up	5.28e-43	peroxidase 31-like [Chenopodium quinoa]
reactive oxygen species metabolic	TRINITY_DN22839_c0_g1	8.04986	up	1.14e-08	peroxidase 39-like [Chenopodium quinoa]
reactive oxygen species metabolic	TRINITY_DN8624_c0_g1	11.6931	up	6.13e-21	peroxidase 44-like [Spinacia oleracea]
reactive oxygen species metabolic	TRINITY_DN8682_c0_g1	6.70126	up	3.97e-110	PREDICTED: peroxidase 50 [Beta vulgaris subsp. vulgaris]
reactive oxygen species metabolic	TRINITY_DN3904_c0_g1	2.55859	up	6.93e-20	peroxidase 57-like [Chenopodium quinoa]
reactive oxygen species metabolic	TRINITY_DN9979_c0_g2	9.30649	up	6.56e-08	PREDICTED: peroxidase 57 [Beta vulgaris subsp. vulgaris]
reactive oxygen species metabolic	TRINITY_DN19690_c0_g1	4.28338	up	6.5e-12	peroxidase 57-like [Spinacia oleracea]
reactive oxygen species metabolic	TRINITY_DN12205_c0_g1	2.03037	up	5.75e-05	peroxidase 60-like [Spinacia oleracea]
reactive oxygen species metabolic	TRINITY_DN6393_c0_g2	7.82118	up	3.54e-08	PREDICTED: peroxidase 66-like [Beta vulgaris subsp. vulgaris]
reactive oxygen species metabolic	TRINITY_DN6393_c0_g1	3.38719	up	5.1e-09	PREDICTED: peroxidase 66-like [Beta vulgaris subsp. vulgaris]
reactive oxygen species metabolic	TRINITY_DN1807_c0_g1	4.91057	up	2.95e-28	peroxidase 72-like [Chenopodium quinoa]
reactive oxygen species metabolic	TRINITY_DN3689_c0_g1	6.87015	up	6.14e-15	peroxidase 72-like [Chenopodium quinoa]
reactive oxygen species metabolic	TRINITY_DN10578_c0_g1	8.40298	up	5.06e-09	PREDICTED: peroxidase 72 [Beta vulgaris subsp. vulgaris]
reactive oxygen species metabolic	TRINITY_DN10578_c0_g2	6.40195	up	2.88e-07	PREDICTED: peroxidase 72 [Beta vulgaris subsp. vulgaris]
reactive oxygen species metabolic	TRINITY_DN10578_c1_g1	9.23987	up	9.86e-31	PREDICTED: peroxidase 72 [Beta vulgaris subsp. vulgaris]
reactive oxygen species metabolic	TRINITY_DN32648_c0_g1	3.52684	up	3.91e-12	PREDICTED: cationic peroxidase 1 [Beta vulgaris subsp. vulgaris]
reactive oxygen species metabolic	TRINITY_DN1143_c1_g1	3.198	up	0.00670195	superoxide dismutase [Cu-Zn] [Quercus suber]
reactive oxygen species metabolic	TRINITY_DN1143_c1_g3	3.07145	up	4.04e-05	superoxide dismutase [Cu-Zn] [Quercus suber]
reactive oxygen species metabolic	TRINITY_DN2090_c0_g1	-1.02206	down	4.8e-08	copper chaperone for superoxide dismutase, chloroplastic/cytosolic-like isoform X2 [Chenopodium quinoa]
reactive oxygen species metabolic	TRINITY_DN30903_c0_g3	-5.25267	down	0.022169	peroxisomal catalase-like [Quercus suber]
reactive oxygen species metabolic	TRINITY_DN30903_c0_g1	-3.6495	down	0.0232866	peroxisomal catalase-like [Quercus suber]
reactive oxygen species metabolic	TRINITY_DN22188_c1_g4	-4.95853	down	0.0370099	catalase-1-like, partial [Quercus suber]
reactive oxygen species metabolic	TRINITY_DN22188_c1_g2	-4.50471	down	0.025921	catalase-1-like [Quercus suber]
reactive oxygen species metabolic	TRINITY_DN14073_c0_g1	1.52105	up	7.98e-06	cytosolic ascorbate peroxidase [Suaeda salsa]
reactive oxygen species metabolic	TRINITY_DN2826_c0_g1	3.65099	up	1.58e-42	nitrate reductase [NADH] [Chenopodium quinoa]
reactive oxygen species metabolic	TRINITY_DN10030_c0_g1	4.35009	up	0.0357501	ADP-ribosylation factor 2 [Hordeum vulgare]
reactive oxygen species metabolic	TRINITY_DN5274_c0_g1	-1.03494	down	2.28e-07	PREDICTED: probable aldehyde dehydrogenase [Beta vulgaris subsp. vulgaris]
reactive oxygen species metabolic	TRINITY_DN4833_c0_g1	1.04126	up	5.09e-05	G protein alpha subunit [Spinacia oleracea]
reactive oxygen species metabolic	TRINITY_DN9310_c0_g1	2.55715	up	7.47e-06	PREDICTED: CDGSH iron-sulfur domain-containing protein NEET [Beta vulgaris subsp. vulgaris]
reactive oxygen species metabolic	TRINITY_DN27904_c0_g1	1.25563	up	0.000121825	PREDICTED: putative BPI/LBP family protein At1g04970 [Beta vulgaris subsp. vulgaris]
reactive oxygen species metabolic	TRINITY_DN7701_c0_g1	1.63275	up	2.19e-14	thylakoid lumenal 29 kDa protein, chloroplastic-like [Chenopodium quinoa]
reactive oxygen species metabolic	TRINITY_DN5806_c0_g1	1.47977	up	0.00812829	vacuolar protein sorting 34 [Prunus dulcis]
reactive oxygen species metabolic	TRINITY_DN7616_c0_g1	2.23079	up	0.000484169	uncharacterized protein LOC110690628 [Chenopodium quinoa]
reactive oxygen species metabolic	TRINITY_DN25677_c0_g1	6.08069	up	0.000512359	hypothetical protein FH972_022095 [Carpinus fangiana]
reactive oxygen species metabolic	TRINITY_DN3387_c0_g1	-1.11586	down	2.92e-07	hypothetical protein SOVF_058270 [Spinacia oleracea]
reactive oxygen species metabolic	TRINITY_DN4381_c0_g1	1.11112	up	0.00730257	hypothetical protein BVRB_8g182170 isoform B [Beta vulgaris subsp. vulgaris]
reactive oxygen species metabolic	TRINITY_DN10578_c0_g3	6.41183	up	7.17e-07	hypothetical protein SOVF_065170 [Spinacia oleracea]
reactive oxygen species metabolic	TRINITY_DN9857_c0_g1	2.34883	up	4.2e-06	predicted protein [Hordeum vulgare subsp. vulgare]
reactive oxygen species metabolic process in the SlG_C vs SlG_N group
reactive oxygen species metabolic	TRINITY_DN10246_c0_g1	-2.19841	down	1.82e-06	peroxidase 5-like [Chenopodium quinoa]
reactive oxygen species metabolic	TRINITY_DN4367_c0_g1	-2.85222	down	0.000935559	PREDICTED: peroxidase 5-like [Beta vulgaris subsp. vulgaris]
reactive oxygen species metabolic	TRINITY_DN12167_c0_g1	-1.09346	down	0.00292035	PREDICTED: peroxidase P7-like [Beta vulgaris subsp. vulgaris]
reactive oxygen species metabolic	TRINITY_DN1769_c0_g1	-1.18974	down	0.00087714	PREDICTED: peroxidase P7-like [Beta vulgaris subsp. vulgaris]
reactive oxygen species metabolic	TRINITY_DN10166_c0_g1	1.14911	up	2.91e-06	PREDICTED: peroxidase P7 [Beta vulgaris subsp. vulgaris]
reactive oxygen species metabolic	TRINITY_DN29303_c0_g1	-1.45386	down	1.64e-08	peroxidase P7-like [Chenopodium quinoa]
reactive oxygen species metabolic	TRINITY_DN5883_c0_g1	1.73907	up	0.0131264	peroxidase 12-like [Chenopodium quinoa]
reactive oxygen species metabolic	TRINITY_DN17466_c0_g1	-1.30395	down	0.0317213	peroxidase 27-like [Chenopodium quinoa]
reactive oxygen species metabolic	TRINITY_DN38751_c0_g1	-2.53729	down	0.0300417	peroxidase 27-like [Chenopodium quinoa]
reactive oxygen species metabolic	TRINITY_DN81536_c0_g1	-3.09115	down	0.0419412	PREDICTED: peroxidase 27 [Beta vulgaris subsp. vulgaris]
reactive oxygen species metabolic	TRINITY_DN8624_c0_g1	-1.39157	down	0.00385116	peroxidase 44-like [Spinacia oleracea]
reactive oxygen species metabolic	TRINITY_DN6393_c0_g1	1.86313	up	0.0019248	PREDICTED: peroxidase 66-like [Beta vulgaris subsp. vulgaris]
reactive oxygen species metabolic	TRINITY_DN7902_c0_g1	-1.3833	down	6.89e-05	catalase-like [Chenopodium quinoa]
reactive oxygen species metabolic	TRINITY_DN7616_c0_g1	1.48932	up	0.00217295	uncharacterized protein LOC110690628 [Chenopodium quinoa]
reactive oxygen species metabolic	TRINITY_DN9310_c0_g1	1.45247	up	0.0198119	PREDICTED: CDGSH iron-sulfur domain-containing protein NEET [Beta vulgaris subsp. vulgaris]
reactive oxygen species metabolic	TRINITY_DN7701_c0_g1	1.01083	up	0.00261945	thylakoid lumenal 29 kDa protein, chloroplastic-like [Chenopodium quinoa]

## Sheet: Table S7
Table S7. A list of DEGs involved in cell wall organization or biogenesis in the SlD vs SlG_C and SlG_C vs SlG_N groups.
"up": respresents up-regulation of gene expression, "down":respresents down-regulation of gene expression (|log2 FC| ≥ 1, Padj -value< 0.05).
FC:Fold change of gene expression level.
Category	Gene ID	log2 FC	Regulate	Padj-value	NR Description
cell wall organization or biogenesis in the SlD vs SlG_C group
cell wall organization or biogenesis	TRINITY_DN11967_c0_g1	10.6739	up	5.95e-52	xyloglucan endotransglucosylase/hydrolase protein 24-like [Chenopodium quinoa]
cell wall organization or biogenesis	TRINITY_DN45986_c0_g1	7.85464	up	6.84e-08	probable xyloglucan endotransglucosylase/hydrolase protein 16 [Spinacia oleracea]
cell wall organization or biogenesis	TRINITY_DN7272_c1_g1	4.98352	up	0.0256733	probable xyloglucan endotransglucosylase/hydrolase protein 23 [Chenopodium quinoa]
cell wall organization or biogenesis	TRINITY_DN5705_c0_g1	2.2719	up	7.75e-15	probable xyloglucan endotransglucosylase/hydrolase protein 23 isoform X1 [Spinacia oleracea]
cell wall organization or biogenesis	TRINITY_DN11538_c0_g1	5.87993	up	0.00196621	probable xyloglucan endotransglucosylase/hydrolase protein 33 [Spinacia oleracea]
cell wall organization or biogenesis	TRINITY_DN27341_c0_g1	5.75357	up	0.0109311	xyloglucan endotransglucosylase/hydrolase protein 24-like [Chenopodium quinoa]
cell wall organization or biogenesis	TRINITY_DN6994_c0_g2	5.21756	up	9.47e-78	probable xyloglucan endotransglucosylase/hydrolase protein 23 [Chenopodium quinoa]
cell wall organization or biogenesis	TRINITY_DN6994_c0_g1	7.40511	up	3.05e-161	probable xyloglucan endotransglucosylase/hydrolase protein 23 [Chenopodium quinoa]
cell wall organization or biogenesis	TRINITY_DN40587_c0_g1	6.14935	up	0.000298756	probable xyloglucan endotransglucosylase/hydrolase protein 23 [Chenopodium quinoa]
cell wall organization or biogenesis	TRINITY_DN4215_c0_g1	4.7118	up	5.96e-56	PREDICTED: probable xyloglucan endotransglucosylase/hydrolase protein 23 [Beta vulgaris subsp. vulgaris]
cell wall organization or biogenesis	TRINITY_DN4215_c0_g1	4.7118	up	5.96e-56	PREDICTED: probable xyloglucan endotransglucosylase/hydrolase protein 23 [Beta vulgaris subsp. vulgaris]
cell wall organization or biogenesis	TRINITY_DN7272_c0_g2	6.5787	up	3.65e-05	PREDICTED: probable xyloglucan endotransglucosylase/hydrolase protein 23 [Beta vulgaris subsp. vulgaris]
cell wall organization or biogenesis	TRINITY_DN40370_c0_g1	3.65495	up	2.21e-84	xyloglucan endotransglucosylase/hydrolase 2-like [Chenopodium quinoa]
cell wall organization or biogenesis	TRINITY_DN7874_c0_g1	7.36347	up	5.22e-07	expansin-A11-like [Chenopodium quinoa]
cell wall organization or biogenesis	TRINITY_DN5798_c0_g1	5.24868	up	1.12e-61	expansin-A11-like [Chenopodium quinoa]
cell wall organization or biogenesis	TRINITY_DN5798_c0_g2	11.4468	up	8.39e-20	expansin-A11-like [Chenopodium quinoa]
cell wall organization or biogenesis	TRINITY_DN5798_c1_g1	1.54571	up	1.87e-14	expansin-A11 [Spinacia oleracea]
cell wall organization or biogenesis	TRINITY_DN8701_c0_g1	-2.28931	down	1.67e-54	expansin-A10-like [Chenopodium quinoa]
cell wall organization or biogenesis	TRINITY_DN12755_c0_g1	5.67136	up	0.00351427	Expansin-A24 [Hordeum vulgare]
cell wall organization or biogenesis	TRINITY_DN18250_c0_g1	4.82175	up	8.98e-07	expansin-A10-like [Chenopodium quinoa]
cell wall organization or biogenesis	TRINITY_DN7994_c0_g1	5.14086	up	1.7e-26	expansin-A12-like [Chenopodium quinoa]
cell wall organization or biogenesis	TRINITY_DN42323_c0_g1	-5.38301	down	0.00954271	putative expansin-A26 [Chenopodium quinoa]
cell wall organization or biogenesis	TRINITY_DN11950_c0_g1	1.04845	up	3e-08	expansin-A4-like [Chenopodium quinoa]
cell wall organization or biogenesis	TRINITY_DN3117_c0_g2	2.60978	up	7.01e-20	expansin [Achyranthes bidentata]
cell wall organization or biogenesis	TRINITY_DN6078_c0_g1	3.32889	up	9.21e-18	probable pectinesterase 53 isoform X1 [Chenopodium quinoa]
cell wall organization or biogenesis	TRINITY_DN3646_c1_g1	2.97229	up	2.06e-07	probable pectinesterase 53 [Chenopodium quinoa]
cell wall organization or biogenesis	TRINITY_DN74782_c0_g1	2.72899	up	2.35e-06	probable pectinesterase 53 [Spinacia oleracea]
cell wall organization or biogenesis	TRINITY_DN4991_c0_g1	3.04821	up	0.012217	putative pectinesterase 11 [Spinacia oleracea]
cell wall organization or biogenesis	TRINITY_DN50951_c0_g2	6.06667	up	0.000445356	pectinesterase-like [Chenopodium quinoa]
cell wall organization or biogenesis	TRINITY_DN75143_c0_g1	4.9677	up	0.0236546	PREDICTED: probable pectinesterase 68 [Beta vulgaris subsp. vulgaris]
cell wall organization or biogenesis	TRINITY_DN5545_c0_g1	2.78168	up	6.79e-21	PREDICTED: probable pectinesterase/pectinesterase inhibitor 59 [Beta vulgaris subsp. vulgaris]
cell wall organization or biogenesis	TRINITY_DN5680_c0_g1	4.56525	up	9.92e-49	PREDICTED: probable pectinesterase/pectinesterase inhibitor 12 [Beta vulgaris subsp. vulgaris]
cell wall organization or biogenesis	TRINITY_DN21974_c0_g1	2.09113	up	1.2e-16	PREDICTED: pectinesterase/pectinesterase inhibitor PPE8B [Beta vulgaris subsp. vulgaris]
cell wall organization or biogenesis	TRINITY_DN21701_c0_g1	-1.37134	down	0.0109232	PREDICTED: probable pectinesterase/pectinesterase inhibitor 25 [Beta vulgaris subsp. vulgaris]
cell wall organization or biogenesis	TRINITY_DN2909_c0_g1	1.37254	up	2.32e-13	pectin acetylesterase 8-like [Spinacia oleracea]
cell wall organization or biogenesis	TRINITY_DN57611_c0_g1	1.41256	up	2.68e-07	pectin acetylesterase 5-like isoform X1 [Spinacia oleracea]
cell wall organization or biogenesis	TRINITY_DN10210_c0_g1	1.48096	up	1.05e-09	PREDICTED: pectin acetylesterase 10 [Beta vulgaris subsp. vulgaris]
cell wall organization or biogenesis	TRINITY_DN12330_c1_g1	4.25089	up	1.15e-24	pectin acetylesterase 9-like [Chenopodium quinoa]
cell wall organization or biogenesis	TRINITY_DN10851_c0_g1	-3.04649	down	5.45e-06	LOW QUALITY PROTEIN: pectin acetylesterase 6-like [Spinacia oleracea]
cell wall organization or biogenesis	TRINITY_DN29205_c0_g1	4.82435	up	0.0349318	pectin methylesterase [Vitis riparia]
cell wall organization or biogenesis	TRINITY_DN29205_c0_g2	4.83705	up	0.0465945	pectin methylesterase [Vitis riparia]
cell wall organization or biogenesis	TRINITY_DN58043_c0_g1	1.68373	up	5.28e-12	PREDICTED: polygalacturonase-like [Beta vulgaris subsp. vulgaris]
cell wall organization or biogenesis	TRINITY_DN5593_c0_g1	3.5783	up	1.56e-11	polygalacturonase-like [Chenopodium quinoa]
cell wall organization or biogenesis	TRINITY_DN20802_c0_g1	1.43356	up	0.0272688	probable polygalacturonase At1g80170 [Chenopodium quinoa]
cell wall organization or biogenesis	TRINITY_DN32575_c0_g1	8.5517	up	3.73e-10	polygalacturonase-like [Chenopodium quinoa]
cell wall organization or biogenesis	TRINITY_DN11244_c0_g1	10.391	up	9.1e-38	polygalacturonase-like [Spinacia oleracea]
cell wall organization or biogenesis	TRINITY_DN4724_c1_g1	1.1518	up	1.74e-06	probable polygalacturonase [Chenopodium quinoa]
cell wall organization or biogenesis	TRINITY_DN6398_c0_g1	2.37927	up	1.07e-10	PREDICTED: probable polygalacturonase isoform X2 [Beta vulgaris subsp. vulgaris]
cell wall organization or biogenesis	TRINITY_DN16803_c0_g2	3.22259	up	1.48e-16	polygalacturonase At1g48100-like [Chenopodium quinoa]
cell wall organization or biogenesis	TRINITY_DN15582_c0_g1	3.96126	up	0.00288472	polygalacturonase At1g48100-like [Chenopodium quinoa]
cell wall organization or biogenesis	TRINITY_DN3900_c0_g1	1.37427	up	8.29e-13	PREDICTED: probable polygalacturonase [Beta vulgaris subsp. vulgaris]
cell wall organization or biogenesis	TRINITY_DN25741_c0_g2	9.73719	up	4.65e-08	polygalacturonase-like [Chenopodium quinoa]
cell wall organization or biogenesis	TRINITY_DN16572_c0_g2	6.41397	up	1.23e-05	polygalacturonase At1g48100 [Chenopodium quinoa]
cell wall organization or biogenesis	TRINITY_DN6193_c0_g1	10.4841	up	1.74e-16	PREDICTED: polygalacturonase-like [Beta vulgaris subsp. vulgaris]
cell wall organization or biogenesis	TRINITY_DN2698_c0_g1	1.6858	up	1.52e-10	probable galacturonosyltransferase-like 1 [Chenopodium quinoa]
cell wall organization or biogenesis	TRINITY_DN53942_c0_g1	1.49581	up	2.36e-13	probable galacturonosyltransferase 7 isoform X1 [Spinacia oleracea]
cell wall organization or biogenesis	TRINITY_DN58_c0_g1	1.27171	up	5.17e-06	UDP-glucuronate:xylan alpha-glucuronosyltransferase 2-like isoform X1 [Chenopodium quinoa]
cell wall organization or biogenesis	TRINITY_DN24426_c0_g1	2.78439	up	7.85e-11	UDP-glucuronate:xylan alpha-glucuronosyltransferase 1-like [Chenopodium quinoa]
cell wall organization or biogenesis	TRINITY_DN7205_c0_g1	1.71405	up	1.09e-15	PREDICTED: cellulose synthase-like protein D3 isoform X1 [Beta vulgaris subsp. vulgaris]
cell wall organization or biogenesis	TRINITY_DN25142_c0_g1	2.10506	up	5.29e-09	cellulose synthase A catalytic subunit 8 [UDP-forming]-like [Chenopodium quinoa]
cell wall organization or biogenesis	TRINITY_DN24840_c0_g6	5.75585	up	0.00197314	cellulose synthase-like protein D5 [Chenopodium quinoa]
cell wall organization or biogenesis	TRINITY_DN6613_c0_g1	1.27299	up	2.21e-13	cellulose synthase-like protein D3 [Chenopodium quinoa]
cell wall organization or biogenesis	TRINITY_DN21998_c0_g2	-5.15167	down	0.0192363	cellulose synthase A catalytic subunit 1 [UDP-forming] isoform X2 [Populus trichocarpa]
cell wall organization or biogenesis	TRINITY_DN3320_c0_g1	3.24501	up	4.3e-19	cellulose synthase A catalytic subunit 7 [UDP-forming] isoform X2 [Spinacia oleracea]
cell wall organization or biogenesis	TRINITY_DN896_c0_g1	2.07418	up	1.15e-28	PREDICTED: cellulose synthase-like protein E1 [Beta vulgaris subsp. vulgaris]
cell wall organization or biogenesis	TRINITY_DN5811_c0_g2	1.58917	up	5.69e-12	PREDICTED: probable beta-1,4-xylosyltransferase IRX10L [Beta vulgaris subsp. vulgaris]
cell wall organization or biogenesis	TRINITY_DN12961_c0_g1	2.77534	up	4.32e-06	probable beta-1,4-xylosyltransferase IRX9 [Chenopodium quinoa]
cell wall organization or biogenesis	TRINITY_DN4014_c0_g1	1.10522	up	1.13e-09	probable beta-1,4-xylosyltransferase IRX9H [Chenopodium quinoa]
cell wall organization or biogenesis	TRINITY_DN6353_c0_g1	1.91706	up	2.48e-20	probable beta-1,4-xylosyltransferase IRX14 [Chenopodium quinoa]
cell wall organization or biogenesis	TRINITY_DN6565_c0_g1	4.79716	up	2.38e-17	glucuronoxylan 4-O-methyltransferase 3-like [Chenopodium quinoa]
cell wall organization or biogenesis	TRINITY_DN3793_c0_g1	4.6035	up	8.3e-26	glucuronoxylan 4-O-methyltransferase 1-like [Chenopodium quinoa]
cell wall organization or biogenesis	TRINITY_DN567_c0_g1	-1.67036	down	1.22e-08	Protein REDUCED WALL ACETYLATION 1 [Zea mays]
cell wall organization or biogenesis	TRINITY_DN5735_c0_g1	1.14981	up	1.07e-11	protein REDUCED WALL ACETYLATION 3-like [Chenopodium quinoa]
cell wall organization or biogenesis	TRINITY_DN7484_c1_g1	5.21244	up	6.19e-65	leucine-rich repeat extensin-like protein 4 [Spinacia oleracea]
cell wall organization or biogenesis	TRINITY_DN10735_c0_g1	2.56762	up	3.51e-09	leucine-rich repeat receptor-like protein kinase PXC1 [Spinacia oleracea]
cell wall organization or biogenesis	TRINITY_DN7897_c0_g1	-1.33653	down	2.3e-12	non-specific lipid-transfer protein-like [Spinacia oleracea]
cell wall organization or biogenesis	TRINITY_DN2388_c0_g1	3.54091	up	4.05e-26	PREDICTED: non-specific lipid-transfer protein 1 [Beta vulgaris subsp. vulgaris]
cell wall organization or biogenesis	TRINITY_DN7155_c0_g1	4.18324	up	5.78e-86	PREDICTED: fasciclin-like arabinogalactan protein 7 [Beta vulgaris subsp. vulgaris]
cell wall organization or biogenesis	TRINITY_DN33579_c0_g1	3.88943	up	3.64e-18	fasciclin-like arabinogalactan protein 11 [Chenopodium quinoa]
cell wall organization or biogenesis	TRINITY_DN23741_c0_g1	1.18641	up	2.7e-09	PREDICTED: UDP-D-xylose:L-fucose alpha-1,3-D-xylosyltransferase MGP4 [Beta vulgaris subsp. vulgaris]
cell wall organization or biogenesis	TRINITY_DN5927_c0_g1	1.01492	up	9.09e-08	galactoside 2-alpha-L-fucosyltransferase-like [Chenopodium quinoa]
cell wall organization or biogenesis	TRINITY_DN13610_c0_g1	-1.67407	down	4.29e-16	probable methyltransferase At1g27930 [Spinacia oleracea]
cell wall organization or biogenesis	TRINITY_DN28650_c0_g1	4.27323	up	0.0362494	probable glycosidase crf1 [Quercus suber]
cell wall organization or biogenesis	TRINITY_DN10826_c0_g1	-2.21186	down	0.000599095	phosphoinositide phosphatase SAC1 isoform X1 [Cinnamomum micranthum f. kanehirae]
cell wall organization or biogenesis	TRINITY_DN6462_c0_g1	-1.09037	down	0.00120016	branched-chain-amino-acid aminotransferase 2, chloroplastic-like isoform X1 [Spinacia oleracea]
cell wall organization or biogenesis	TRINITY_DN4056_c0_g2	3.38731	up	6.44e-35	1,4-dihydroxy-2-naphthoyl-CoA synthase, peroxisomal-like [Chenopodium quinoa]
cell wall organization or biogenesis	TRINITY_DN381_c1_g1	1.01168	up	0.000167124	PREDICTED: kinesin-like protein KIN-13A [Beta vulgaris subsp. vulgaris]
cell wall organization or biogenesis	TRINITY_DN41096_c0_g3	-1.65558	down	6.17e-13	PREDICTED: WD repeat-containing protein 82-B [Beta vulgaris subsp. vulgaris]
cell wall organization or biogenesis	TRINITY_DN2067_c0_g1	-1.65462	down	1.05e-20	60S ribosomal export protein NMD3-like [Chenopodium quinoa]
cell wall organization or biogenesis	TRINITY_DN8626_c0_g1	8.5902	up	1.27e-10	insoluble matrix shell protein 4-like [Spinacia oleracea]
cell wall organization or biogenesis	TRINITY_DN13033_c0_g1	1.83861	up	5.08e-14	PREDICTED: uncharacterized protein LOC109135832 [Beta vulgaris subsp. vulgaris]
cell wall organization or biogenesis	TRINITY_DN6916_c0_g2	1.83861	up	5.08e-14	uncharacterized protein At4g15970-like [Spinacia oleracea]
cell wall organization or biogenesis	TRINITY_DN6789_c0_g1	-1.42005	down	2.71e-09	uncharacterized protein LOC111316811 [Durio zibethinus]
cell wall organization or biogenesis	TRINITY_DN3134_c0_g1	1.21515	up	1.2e-05	PREDICTED: uncharacterized protein LOC104884291 isoform X2 [Beta vulgaris subsp. vulgaris]
cell wall organization or biogenesis	TRINITY_DN29637_c0_g1	2.37555	up	0.00379404	PREDICTED: uncharacterized protein At1g28695 [Beta vulgaris subsp. vulgaris]
cell wall organization or biogenesis	TRINITY_DN14941_c0_g1	2.84815	up	3.41e-06	hypothetical protein SOVF_037320 [Spinacia oleracea]
cell wall organization or biogenesis	TRINITY_DN71678_c1_g1	5.24642	up	0.0107865	hypothetical protein BVRB_6g151350 [Beta vulgaris subsp. vulgaris]
cell wall organization or biogenesis	TRINITY_DN21921_c0_g1	8.15063	up	3.49e-27	hypothetical protein SOVF_200910 [Spinacia oleracea]
cell wall organization or biogenesis	TRINITY_DN10626_c0_g1	1.01846	up	0.00630333	hypothetical protein SOVF_076660 [Spinacia oleracea]
cell wall organization or biogenesis	TRINITY_DN40370_c0_g2	3.57316	up	3.33e-84	hypothetical protein SOVF_173740 [Spinacia oleracea]
cell wall organization or biogenesis	TRINITY_DN14590_c0_g1	5.01698	up	2.71e-12	hypothetical protein SOVF_179310 [Spinacia oleracea]
cell wall organization or biogenesis	TRINITY_DN6282_c0_g1	3.90049	up	1.6e-88	hypothetical protein MIMGU_mgv1a011868mg [Erythranthe guttata]
cell wall organization or biogenesis	TRINITY_DN8204_c0_g1	2.60169	up	3.7e-06	hypothetical protein BVRB_5g098360 isoform B [Beta vulgaris subsp. vulgaris]
cell wall organization or biogenesis	TRINITY_DN3117_c0_g1	3.11678	up	8.96e-25	hypothetical protein F8388_011069 [Cannabis sativa]
cell wall organization or biogenesis	TRINITY_DN5846_c0_g1	5.3501	up	8.22e-13	hypothetical protein BVRB_1g018800 [Beta vulgaris subsp. vulgaris]
cell wall organization or biogenesis	TRINITY_DN15091_c2_g2	-2.46419	down	0.00253924	hypothetical protein FXO37_28740 [Capsicum annuum]
cell wall organization or biogenesis	TRINITY_DN11484_c0_g1	7.43235	up	8.67e-08	hypothetical protein BVRB_3g065210 [Beta vulgaris subsp. vulgaris]
cell wall organization or biogenesis in the SlG_C vs SlG_N group
cell wall organization or biogenesis	TRINITY_DN11967_c0_g1	-1.41162	down	1.29e-06	xyloglucan endotransglucosylase/hydrolase protein 24-like [Chenopodium quinoa]
cell wall organization or biogenesis	TRINITY_DN40370_c0_g1	-1.62421	down	4.58e-12	xyloglucan endotransglucosylase/hydrolase 2-like [Chenopodium quinoa]
cell wall organization or biogenesis	TRINITY_DN6994_c0_g1	-1.30165	down	0.000740594	probable xyloglucan endotransglucosylase/hydrolase protein 23 [Chenopodium quinoa]
cell wall organization or biogenesis	TRINITY_DN6994_c0_g2	-1.62854	down	8.83e-06	probable xyloglucan endotransglucosylase/hydrolase protein 23 [Chenopodium quinoa]
cell wall organization or biogenesis	TRINITY_DN4215_c0_g1	-2.38173	down	2.41e-20	PREDICTED: probable xyloglucan endotransglucosylase/hydrolase protein 23 [Beta vulgaris subsp. vulgaris]
cell wall organization or biogenesis	TRINITY_DN8701_c0_g1	2.02309	up	4.49e-08	expansin-A10-like [Chenopodium quinoa]
cell wall organization or biogenesis	TRINITY_DN11950_c0_g1	1.73957	up	5.81e-12	expansin-A4-like [Chenopodium quinoa]
cell wall organization or biogenesis	TRINITY_DN32575_c0_g1	2.38656	up	1.73e-09	polygalacturonase-like [Chenopodium quinoa]
cell wall organization or biogenesis	TRINITY_DN5593_c0_g1	1.0937	up	0.0189697	polygalacturonase-like [Chenopodium quinoa]
cell wall organization or biogenesis	TRINITY_DN3973_c0_g1	1.20049	up	0.0324056	polygalacturonase At1g48100 [Spinacia oleracea]
cell wall organization or biogenesis	TRINITY_DN16803_c0_g2	1.92519	up	1.37e-05	polygalacturonase At1g48100-like [Chenopodium quinoa]
cell wall organization or biogenesis	TRINITY_DN42752_c0_g1	6.2455	up	0.0042805	PREDICTED: exopolygalacturonase-like [Beta vulgaris subsp. vulgaris]
cell wall organization or biogenesis	TRINITY_DN4991_c0_g1	1.56114	up	0.0364912	putative pectinesterase 11 [Spinacia oleracea]
cell wall organization or biogenesis	TRINITY_DN6078_c0_g1	1.23158	up	0.00292035	probable pectinesterase 53 isoform X1 [Chenopodium quinoa]
cell wall organization or biogenesis	TRINITY_DN4831_c0_g1	-1.26719	down	0.010944	probable pectinesterase/pectinesterase inhibitor 41 [Chenopodium quinoa]
cell wall organization or biogenesis	TRINITY_DN5680_c0_g1	-1.65193	down	5.68e-08	PREDICTED: probable pectinesterase/pectinesterase inhibitor 12 [Beta vulgaris subsp. vulgaris]
cell wall organization or biogenesis	TRINITY_DN11746_c0_g1	-1.44217	down	7.98e-08	protein IRX15-LIKE-like [Chenopodium quinoa]
cell wall organization or biogenesis	TRINITY_DN7897_c0_g1	-1.65844	down	6.4e-15	non-specific lipid-transfer protein-like [Spinacia oleracea]
cell wall organization or biogenesis	TRINITY_DN11264_c0_g1	1.59754	up	7.65e-06	PREDICTED: non-specific lipid-transfer protein 1 [Beta vulgaris subsp. vulgaris]
cell wall organization or biogenesis	TRINITY_DN13033_c0_g1	-2.20923	down	0.0494707	PREDICTED: uncharacterized protein LOC109135832 [Beta vulgaris subsp. vulgaris]
cell wall organization or biogenesis	TRINITY_DN40370_c0_g2	-1.57786	down	1.67e-11	hypothetical protein SOVF_173740 [Spinacia oleracea]

## Sheet: Table S8
Table S8. A list of DEGs involved in carbohydrate metabolic pathway in the SlD vs SlG_C and SlG_C vs SlG_N groups.
"up": respresents up-regulation of gene expression, "down":respresents down-regulation of gene expression (|log2 FC| ≥ 1, Padj -value< 0.05).
FC:Fold change of gene expression level.
Category	Gene ID	log2 FC	Regulate	Padj-value	NR Description
carbohydrate metabolic pathway in the SlD vs SlG_C group
carbohydrate metabolic process	TRINITY_DN23842_c0_g2	2.8411	up	0.00419663	PREDICTED: isocitrate lyase [Beta vulgaris subsp. vulgaris]
carbohydrate metabolic process	TRINITY_DN45027_c0_g1	1.73447	up	2.67e-15	isocitrate lyase-like isoform X2 [Chenopodium quinoa]
carbohydrate metabolic process	TRINITY_DN15255_c0_g1	3.89263	up	0.00197246	malate synthase, glyoxysomal-like [Quercus suber]
carbohydrate metabolic process	TRINITY_DN15255_c0_g3	2.7956	up	0.00236284	malate synthase, glyoxysomal-like [Quercus suber]
carbohydrate metabolic process	TRINITY_DN15255_c0_g2	2.01638	up	0.014554	malate synthase, glyoxysomal-like [Quercus suber]
carbohydrate metabolic process	TRINITY_DN1133_c0_g1	-1.64501	down	7.16e-21	PREDICTED: malate synthase, glyoxysomal [Beta vulgaris subsp. vulgaris]
carbohydrate metabolic process	TRINITY_DN824_c0_g1	-1.2982	down	1.42e-07	malate dehydrogenase, glyoxysomal [Chenopodium quinoa]
carbohydrate metabolic process	TRINITY_DN6889_c0_g1	5.33899	up	0.00810111	malate dehydrogenase, cytoplasmic-like [Quercus suber]
carbohydrate metabolic process	TRINITY_DN5605_c0_g1	2.45541	up	2.66e-08	malate dehydrogenase, cytoplasmic-like [Quercus suber]
carbohydrate metabolic process	TRINITY_DN13168_c0_g1	1.10937	up	0.012279	malate dehydrogenase, mitochondrial-like [Quercus suber]
carbohydrate metabolic process	TRINITY_DN4111_c0_g1	2.72253	up	2.71e-27	phosphoenolpyruvate carboxykinase (ATP)-like [Chenopodium quinoa]
carbohydrate metabolic process	TRINITY_DN28830_c0_g1	3.10825	up	1.76e-07	phosphoenolpyruvate carboxykinase (ATP) [Quercus suber]
carbohydrate metabolic process	TRINITY_DN5563_c0_g1	3.04814	up	1.4e-25	fructose-bisphosphate aldolase 3, chloroplastic-like [Spinacia oleracea]
carbohydrate metabolic process	TRINITY_DN5563_c0_g2	1.30634	up	2.27e-11	PREDICTED: fructose-bisphosphate aldolase 3, chloroplastic [Beta vulgaris subsp. vulgaris]
carbohydrate metabolic process	TRINITY_DN17700_c0_g1	1.20139	up	3.78e-11	fructose-bisphosphate aldolase 1, chloroplastic [Chenopodium quinoa]
carbohydrate metabolic process	TRINITY_DN40333_c0_g1	1.52364	up	0.0150573	glyceraldehyde-3-phosphate dehydrogenase [Quercus suber]
carbohydrate metabolic process	TRINITY_DN631_c0_g1	1.4121	up	3e-13	glyceraldehyde-3-phosphate dehydrogenase [Haloxylon ammodendron]
carbohydrate metabolic process	TRINITY_DN31057_c0_g1	3.82111	up	6.51e-08	glyceraldehyde-3-phosphate dehydrogenase, cytosolic [Spinacia oleracea]
carbohydrate metabolic process	TRINITY_DN19049_c0_g1	1.85547	up	3.93e-06	glyceraldehyde-3-phosphate dehydrogenase-like [Quercus suber]
carbohydrate metabolic process	TRINITY_DN2660_c0_g1	1.70524	up	1.88e-14	glyceraldehyde-3-phosphate dehydrogenase B, chloroplastic [Chenopodium quinoa]
carbohydrate metabolic process	TRINITY_DN37266_c0_g1	-1.58838	down	0.00977497	PREDICTED: glycerol-3-phosphate dehydrogenase SDP6, mitochondrial [Beta vulgaris subsp. vulgaris]
carbohydrate metabolic process	TRINITY_DN30340_c0_g1	4.14542	up	0.0123593	PREDICTED: glycerol-3-phosphate dehydrogenase [NAD(+)] [Beta vulgaris subsp. vulgaris]
carbohydrate metabolic process	TRINITY_DN6204_c0_g2	3.49131	up	9.28e-36	glycerol kinase [Spinacia oleracea]
carbohydrate metabolic process	TRINITY_DN41546_c0_g1	4.8294	up	0.035692	phosphoglucomutase-like [Quercus suber]
carbohydrate metabolic process	TRINITY_DN1592_c0_g2	-3.1626	down	3.72e-06	phosphoglucomutase, chloroplastic [Spinacia oleracea]
carbohydrate metabolic process	TRINITY_DN24222_c0_g1	-4.07342	down	0.00201433	phosphoglucomutase [Spinacia oleracea]
carbohydrate metabolic process	TRINITY_DN4933_c0_g1	2.45954	up	4.41e-06	phosphoglucomutase-like [Quercus suber]
carbohydrate metabolic process	TRINITY_DN4933_c0_g2	2.01322	up	0.0331087	phosphoglucomutase-like [Quercus suber]
carbohydrate metabolic process	TRINITY_DN801_c0_g1	-1.15325	down	3.61e-07	cytosolic fructose-1,6-bisphosphatase [Beta vulgaris]
carbohydrate metabolic process	TRINITY_DN10138_c0_g2	2.43642	up	3.16e-27	PREDICTED: fructose-1,6-bisphosphatase, chloroplastic [Beta vulgaris subsp. vulgaris]
carbohydrate metabolic process	TRINITY_DN7697_c0_g2	1.31175	up	7.22e-08	ribulose bisphosphate carboxylase small chain 3, chloroplastic-like [Chenopodium quinoa]
carbohydrate metabolic process	TRINITY_DN4032_c0_g1	4.49335	up	0.020351	ribulose bisphosphate carboxylase small chain 3, chloroplastic-like [Chenopodium quinoa]
carbohydrate metabolic process	TRINITY_DN7697_c0_g3	2.42152	up	8.13e-05	ribulose bisphosphate carboxylase small chain 3, chloroplastic-like [Chenopodium quinoa]
carbohydrate metabolic process	TRINITY_DN480_c0_g1	2.14598	up	7.49e-18	glucose-1-phosphate adenylyltransferase large subunit 3, chloroplastic/amyloplastic [Spinacia oleracea]
carbohydrate metabolic process	TRINITY_DN953_c0_g1	-2.40329	down	4.5e-61	PREDICTED: glucose-1-phosphate adenylyltransferase large subunit 1 [Beta vulgaris subsp. vulgaris]
carbohydrate metabolic process	TRINITY_DN66611_c0_g1	5.16694	up	0.0137522	probable UTP--glucose-1-phosphate uridylyltransferase [Quercus suber]
carbohydrate metabolic process	TRINITY_DN38383_c0_g1	1.51257	up	7.74e-12	6-phosphogluconate dehydrogenase, decarboxylating 1 [Chenopodium quinoa]
carbohydrate metabolic process	TRINITY_DN15641_c0_g1	1.07769	up	0.00835161	6-phosphogluconate dehydrogenase, decarboxylating 1-like [Quercus suber]
carbohydrate metabolic process	TRINITY_DN1656_c0_g1	-1.72627	down	7.2e-25	PREDICTED: glucose-6-phosphate 1-dehydrogenase 4, chloroplastic isoform X1 [Beta vulgaris subsp. vulgaris]
carbohydrate metabolic process	TRINITY_DN3858_c0_g2	1.12676	up	3.3e-07	glucose-6-phosphate isomerase 1, chloroplastic-like [Chenopodium quinoa]
carbohydrate metabolic process	TRINITY_DN13587_c0_g2	2.22389	up	0.0130083	glucose-6-phosphate 1-epimerase-like [Quercus suber]
carbohydrate metabolic process	TRINITY_DN35255_c0_g1	1.3436	up	0.0442251	glucose-6-phosphate 1-dehydrogenase [Quercus suber]
carbohydrate metabolic process	TRINITY_DN5288_c0_g1	1.01443	up	7.37e-07	PREDICTED: putative glucose-6-phosphate 1-epimerase isoform X1 [Beta vulgaris subsp. vulgaris]
carbohydrate metabolic process	TRINITY_DN15667_c0_g1	1.15095	up	1.54e-07	PREDICTED: aldose 1-epimerase [Beta vulgaris subsp. vulgaris]
carbohydrate metabolic process	TRINITY_DN4230_c0_g1	2.16205	up	1.17e-39	UDP-glucuronate 4-epimerase 6-like [Chenopodium quinoa]
carbohydrate metabolic process	TRINITY_DN58_c0_g1	1.27171	up	5.17e-06	UDP-glucuronate:xylan alpha-glucuronosyltransferase 2-like isoform X1 [Chenopodium quinoa]
carbohydrate metabolic process	TRINITY_DN24426_c0_g1	2.78439	up	7.85e-11	UDP-glucuronate:xylan alpha-glucuronosyltransferase 1-like [Chenopodium quinoa]
carbohydrate metabolic process	TRINITY_DN3160_c1_g2	1.31587	up	0.00101836	PREDICTED: UDP-glucose 4-epimerase GEPI48 [Beta vulgaris subsp. vulgaris]
carbohydrate metabolic process	TRINITY_DN4755_c0_g1	-1.25708	down	6.14e-09	bifunctional UDP-glucose 4-epimerase and UDP-xylose 4-epimerase 1-like [Chenopodium quinoa]
carbohydrate metabolic process	TRINITY_DN1190_c0_g1	-1.46545	down	1.51e-22	sucrose-phosphate synthase [Chenopodium quinoa]
carbohydrate metabolic process	TRINITY_DN1994_c0_g1	-1.13076	down	6.16e-10	PREDICTED: probable sucrose-phosphatase 2 [Beta vulgaris subsp. vulgaris]
carbohydrate metabolic process	TRINITY_DN55540_c0_g1	1.0684	up	0.00792287	sucrose synthase-like [Chenopodium quinoa]
carbohydrate metabolic process	TRINITY_DN2275_c0_g3	1.8078	up	6.42e-10	sucrose synthase-like [Spinacia oleracea]
carbohydrate metabolic process	TRINITY_DN2505_c0_g1	-1.34407	down	2.01e-12	sucrose synthase [Chenopodium quinoa]
carbohydrate metabolic process	TRINITY_DN13092_c0_g1	-2.52454	down	1.2e-39	beta-amylase 1, chloroplastic-like [Chenopodium quinoa]
carbohydrate metabolic process	TRINITY_DN63874_c0_g1	5.16221	up	0.0138123	beta-amylase 1, chloroplastic-like [Chenopodium quinoa]
carbohydrate metabolic process	TRINITY_DN1289_c0_g1	1.99573	up	4.47e-28	beta-amylase 3, chloroplastic-like [Chenopodium quinoa]
carbohydrate metabolic process	TRINITY_DN7073_c0_g1	-1.69801	down	9.53e-10	beta-amylase-like isoform X1 [Chenopodium quinoa]
carbohydrate metabolic process	TRINITY_DN18237_c0_g1	2.23549	up	3.1e-09	PREDICTED: inactive beta-amylase 9 [Beta vulgaris subsp. vulgaris]
carbohydrate metabolic process	TRINITY_DN15074_c0_g1	1.65605	up	2.43e-08	PREDICTED: isoamylase 1, chloroplastic [Beta vulgaris subsp. vulgaris]
carbohydrate metabolic process	TRINITY_DN28443_c0_g1	4.25547	up	0.0129228	glycogen phosphorylase-like [Quercus suber]
carbohydrate metabolic process	TRINITY_DN36147_c0_g1	3.72865	up	1.1e-06	glycogen phosphorylase-like [Quercus suber]
carbohydrate metabolic process	TRINITY_DN2627_c0_g1	2.49103	up	1.09e-23	hexokinase-3-like [Chenopodium quinoa]
carbohydrate metabolic process	TRINITY_DN4149_c0_g2	2.07225	up	2.01e-39	hexokinase-1 [Haloxylon ammodendron]
carbohydrate metabolic process	TRINITY_DN42683_c0_g1	1.94527	up	0.00108874	hexokinase-like [Quercus suber]
carbohydrate metabolic process	TRINITY_DN5803_c0_g1	2.86528	up	1.06e-32	alpha-mannosidase 2-like [Chenopodium quinoa]
carbohydrate metabolic process	TRINITY_DN4944_c0_g1	1.52875	up	0.000274611	PREDICTED: alpha-mannosidase isoform X1 [Beta vulgaris subsp. vulgaris]
carbohydrate metabolic process	TRINITY_DN433_c0_g1	-1.59473	down	9.02e-15	PREDICTED: alpha-mannosidase At3g26720 isoform X1 [Beta vulgaris subsp. vulgaris]
carbohydrate metabolic process	TRINITY_DN36767_c0_g1	-1.7108	down	4.48e-13	PREDICTED: mannan endo-1,4-beta-mannosidase 7 [Beta vulgaris subsp. vulgaris]
carbohydrate metabolic process	TRINITY_DN4673_c0_g1	2.0956	up	1.43e-20	mannan endo-1,4-beta-mannosidase 6-like [Spinacia oleracea]
carbohydrate metabolic process	TRINITY_DN2630_c1_g3	-1.38373	down	5.16e-13	mannosylglycoprotein endo-beta-mannosidase isoform X1 [Spinacia oleracea]
carbohydrate metabolic process	TRINITY_DN29904_c0_g2	5.84031	up	0.00152535	endo-1,4-beta-xylanase 5 [Vitis riparia]
carbohydrate metabolic process	TRINITY_DN29948_c0_g3	-4.55259	down	0.00649888	mannose-6-phosphate isomerase-like [Quercus suber]
carbohydrate metabolic process	TRINITY_DN29948_c0_g2	-6.73746	down	2.52e-05	mannose-6-phosphate isomerase-like [Quercus suber]
carbohydrate metabolic process	TRINITY_DN21130_c0_g1	-6.29815	down	0.000402566	mannose-6-phosphate isomerase-like [Quercus suber]
carbohydrate metabolic process	TRINITY_DN4850_c0_g1	4.98694	up	1.69e-36	PREDICTED: glucan endo-1,3-beta-glucosidase [Beta vulgaris subsp. vulgaris]
carbohydrate metabolic process	TRINITY_DN18605_c0_g1	6.47333	up	5.88e-05	PREDICTED: glucan endo-1,3-beta-glucosidase [Beta vulgaris subsp. vulgaris]
carbohydrate metabolic process	TRINITY_DN18286_c0_g2	3.84769	up	6.16e-06	glucan endo-1,3-beta-glucosidase 11 [Spinacia oleracea]
carbohydrate metabolic process	TRINITY_DN3067_c1_g1	5.43981	up	4.93e-109	glucan endo-1,3-beta-glucosidase-like [Chenopodium quinoa]
carbohydrate metabolic process	TRINITY_DN5658_c0_g1	4.20885	up	1.78e-40	PREDICTED: probable glucan endo-1,3-beta-glucosidase A6 [Beta vulgaris subsp. vulgaris]
carbohydrate metabolic process	TRINITY_DN39583_c0_g1	5.87273	up	0.00184386	PREDICTED: LOW QUALITY PROTEIN: glucan endo-1,3-beta-glucosidase, acidic-like [Beta vulgaris subsp. vulgaris]
carbohydrate metabolic process	TRINITY_DN3597_c0_g1	5.30486	up	5.28e-53	glucan endo-1,3-beta-glucosidase-like precursor [Beta vulgaris subsp. vulgaris]
carbohydrate metabolic process	TRINITY_DN14878_c0_g1	3.04009	up	8.51e-13	PREDICTED: glucan endo-1,3-beta-glucosidase 3 [Beta vulgaris subsp. vulgaris]
carbohydrate metabolic process	TRINITY_DN6137_c0_g1	1.75648	up	3.12e-05	glucan endo-1,3-beta-glucosidase 9-like [Chenopodium quinoa]
carbohydrate metabolic process	TRINITY_DN23016_c0_g1	7.63992	up	8.49e-15	PREDICTED: glucan endo-1,3-beta-glucosidase-like [Beta vulgaris subsp. vulgaris]
carbohydrate metabolic process	TRINITY_DN10455_c0_g1	1.07695	up	4.21e-05	PREDICTED: glucan endo-1,3-beta-glucosidase 14 isoform X1 [Beta vulgaris subsp. vulgaris]
carbohydrate metabolic process	TRINITY_DN25998_c0_g1	2.61257	up	0.00072334	PREDICTED: glucan endo-1,3-beta-glucosidase 13 [Beta vulgaris subsp. vulgaris]
carbohydrate metabolic process	TRINITY_DN33979_c0_g3	-2.55875	down	0.000330039	probable glucan endo-1,3-beta-glucosidase eglC [Quercus suber]
carbohydrate metabolic process	TRINITY_DN886_c1_g1	4.19849	up	4.39e-69	glucan endo-1,3-beta-glucosidase 14 [Spinacia oleracea]
carbohydrate metabolic process	TRINITY_DN13962_c0_g1	2.77714	up	1.7e-09	glucan endo-1,3-beta-glucosidase 5-like [Chenopodium quinoa]
carbohydrate metabolic process	TRINITY_DN64161_c0_g1	1.35468	up	0.0291725	glucan endo-1,3-beta-glucosidase 13-like [Spinacia oleracea]
carbohydrate metabolic process	TRINITY_DN5574_c1_g1	1.27289	up	3e-08	glucan endo-1,3-beta-glucosidase 4-like [Chenopodium quinoa]
carbohydrate metabolic process	TRINITY_DN20271_c0_g1	-2.74432	down	0.0488723	PREDICTED: glucan endo-1,3-beta-glucosidase 8 [Beta vulgaris subsp. vulgaris]
carbohydrate metabolic process	TRINITY_DN5132_c0_g1	12.8214	up	4.07e-33	PREDICTED: glucan endo-1,3-beta-glucosidase [Beta vulgaris subsp. vulgaris]
carbohydrate metabolic process	TRINITY_DN81566_c0_g1	3.1848	up	0.00175624	glucan endo-1,3-beta-glucosidase 2-like [Spinacia oleracea]
carbohydrate metabolic process	TRINITY_DN2161_c0_g1	3.76725	up	5.19e-52	glucan endo-1,3-beta-glucosidase 12-like [Chenopodium quinoa]
carbohydrate metabolic process	TRINITY_DN4072_c0_g2	6.19355	up	9.75e-74	glucan endo-1,3-beta-glucosidase 1-like [Chenopodium quinoa]
carbohydrate metabolic process	TRINITY_DN48462_c1_g2	-4.5104	down	0.00603393	glucan endo-1,3-beta-glucosidase 13 [Spinacia oleracea]
carbohydrate metabolic process	TRINITY_DN2692_c0_g1	5.22833	up	1.75e-13	probable glucan 1,3-beta-glucosidase A [Chenopodium quinoa]
carbohydrate metabolic process	TRINITY_DN26652_c0_g4	4.72229	up	0.0473377	glucan 1,3-beta-glucosidase ARB_02797-like [Quercus suber]
carbohydrate metabolic process	TRINITY_DN13425_c0_g1	-1.86487	down	0.000414515	probable glucan 1,3-beta-glucosidase A isoform X1 [Chenopodium quinoa]
carbohydrate metabolic process	TRINITY_DN2082_c0_g2	9.48365	up	1.87e-13	probable glucan 1,3-beta-glucosidase A [Chenopodium quinoa]
carbohydrate metabolic process	TRINITY_DN2082_c0_g3	5.72499	up	0.00192165	probable glucan 1,3-beta-glucosidase A [Chenopodium quinoa]
carbohydrate metabolic process	TRINITY_DN2082_c0_g1	8.70145	up	5.08e-77	PREDICTED: probable glucan 1,3-beta-glucosidase A [Beta vulgaris subsp. vulgaris]
carbohydrate metabolic process	TRINITY_DN22661_c0_g1	2.96384	up	3.55e-13	PREDICTED: glucan endo-1,3-beta-D-glucosidase isoform X1 [Beta vulgaris subsp. vulgaris]
carbohydrate metabolic process	TRINITY_DN24137_c0_g1	2.3361	up	0.0216603	1,3-beta-glucan synthase component FKS1-like [Quercus suber]
carbohydrate metabolic process	TRINITY_DN8258_c0_g1	2.32709	up	3.35e-06	putative beta-glucosidase 41 isoform X1 [Chenopodium quinoa]
carbohydrate metabolic process	TRINITY_DN3809_c0_g1	5.28788	up	1e-107	beta-glucosidase 44-like [Chenopodium quinoa]
carbohydrate metabolic process	TRINITY_DN5034_c0_g1	9.12867	up	2.27e-23	PREDICTED: beta-glucosidase 18-like [Beta vulgaris subsp. vulgaris]
carbohydrate metabolic process	TRINITY_DN1761_c0_g2	4.99212	up	1.63e-11	PREDICTED: beta-glucosidase 40 isoform X1 [Beta vulgaris subsp. vulgaris]
carbohydrate metabolic process	TRINITY_DN33647_c0_g1	6.27477	up	0.000259792	beta-glucosidase, partial [Striga asiatica]
carbohydrate metabolic process	TRINITY_DN19144_c0_g1	1.71379	up	2.59e-06	beta-glucosidase 11-like isoform X1 [Vitis riparia]
carbohydrate metabolic process	TRINITY_DN3178_c0_g1	2.58329	up	1.12e-15	beta-glucosidase-like SFR2, chloroplastic [Chenopodium quinoa]
carbohydrate metabolic process	TRINITY_DN22851_c0_g2	1.22288	up	4.12e-07	beta-glucosidase 42-like [Chenopodium quinoa]
carbohydrate metabolic process	TRINITY_DN9001_c0_g1	2.78592	up	5.82e-09	beta-glucosidase 12-like [Chenopodium quinoa]
carbohydrate metabolic process	TRINITY_DN49274_c0_g2	3.2618	up	0.0102813	PREDICTED: beta-galactosidase 1 [Beta vulgaris subsp. vulgaris]
carbohydrate metabolic process	TRINITY_DN19517_c0_g1	-1.0618	down	0.00161221	PREDICTED: beta-galactosidase 10 [Beta vulgaris subsp. vulgaris]
carbohydrate metabolic process	TRINITY_DN3613_c0_g1	4.52506	up	1.45e-20	PREDICTED: beta-galactosidase 1 [Beta vulgaris subsp. vulgaris]
carbohydrate metabolic process	TRINITY_DN10538_c0_g1	-1.2866	down	1.79e-11	PREDICTED: beta-galactosidase 8 [Beta vulgaris subsp. vulgaris]
carbohydrate metabolic process	TRINITY_DN600_c0_g3	4.5379	up	2.96e-161	beta-galactosidase 3-like [Chenopodium quinoa]
carbohydrate metabolic process	TRINITY_DN2372_c0_g1	1.89338	up	5.56e-05	beta-galactosidase 6 [Chenopodium quinoa]
carbohydrate metabolic process	TRINITY_DN3119_c0_g1	2.16909	up	3.45e-12	beta-galactosidase 14-like [Chenopodium quinoa]
carbohydrate metabolic process	TRINITY_DN9505_c0_g1	4.80206	up	0.0407789	PREDICTED: beta-galactosidase 3 [Beta vulgaris subsp. vulgaris]
carbohydrate metabolic process	TRINITY_DN307_c0_g1	1.93782	up	4.26e-07	putative beta-galactosidase [Spinacia oleracea]
carbohydrate metabolic process	TRINITY_DN3916_c0_g1	-4.16666	down	1.11e-12	PREDICTED: beta-galactosidase 10 [Erythranthe guttata]
carbohydrate metabolic process	TRINITY_DN42273_c0_g1	-2.78439	down	0.000349169	beta-galactosidase 10 [Spinacia oleracea]
carbohydrate metabolic process	TRINITY_DN3289_c0_g1	1.97205	up	1.19e-14	alpha-galactosidase 3 [Spinacia oleracea]
carbohydrate metabolic process	TRINITY_DN33918_c0_g5	-2.2707	down	0.00843579	alpha-galactosidase-like [Spinacia oleracea]
carbohydrate metabolic process	TRINITY_DN4611_c0_g1	3.92098	up	1.5e-20	alpha-galactosidase-like isoform X1 [Chenopodium quinoa]
carbohydrate metabolic process	TRINITY_DN23953_c0_g3	3.65988	up	0.0103482	arabinan endo-1,5-alpha-L-arabinosidase A-like [Quercus suber]
carbohydrate metabolic process	TRINITY_DN23953_c0_g2	6.14987	up	0.000601231	arabinan endo-1,5-alpha-L-arabinosidase A-like [Quercus suber]
carbohydrate metabolic process	TRINITY_DN8429_c0_g1	4.85185	up	2.92e-15	arabinan endo-1,5-alpha-L-arabinosidase A-like [Quercus suber]
carbohydrate metabolic process	TRINITY_DN5180_c0_g1	1.15088	up	7.14e-09	alpha-L-arabinofuranosidase 1-like [Chenopodium quinoa]
carbohydrate metabolic process	TRINITY_DN896_c0_g1	2.07418	up	1.15e-28	PREDICTED: cellulose synthase-like protein E1 [Beta vulgaris subsp. vulgaris]
carbohydrate metabolic process	TRINITY_DN24840_c0_g6	5.75585	up	0.00197314	cellulose synthase-like protein D5 [Chenopodium quinoa]
carbohydrate metabolic process	TRINITY_DN21998_c0_g2	-5.15167	down	0.0192363	cellulose synthase A catalytic subunit 1 [UDP-forming] isoform X2 [Populus trichocarpa]
carbohydrate metabolic process	TRINITY_DN6613_c0_g1	1.27299	up	2.21e-13	cellulose synthase-like protein D3 [Chenopodium quinoa]
carbohydrate metabolic process	TRINITY_DN25142_c0_g1	2.10506	up	5.29e-09	cellulose synthase A catalytic subunit 8 [UDP-forming]-like [Chenopodium quinoa]
carbohydrate metabolic process	TRINITY_DN3320_c0_g1	3.24501	up	4.3e-19	cellulose synthase A catalytic subunit 7 [UDP-forming] isoform X2 [Spinacia oleracea]
carbohydrate metabolic process	TRINITY_DN7205_c0_g1	1.71405	up	1.09e-15	PREDICTED: cellulose synthase-like protein D3 isoform X1 [Beta vulgaris subsp. vulgaris]
carbohydrate metabolic process	TRINITY_DN3646_c1_g1	2.97229	up	2.06e-07	probable pectinesterase 53 [Chenopodium quinoa]
carbohydrate metabolic process	TRINITY_DN5545_c0_g1	2.78168	up	6.79e-21	PREDICTED: probable pectinesterase/pectinesterase inhibitor 59 [Beta vulgaris subsp. vulgaris]
carbohydrate metabolic process	TRINITY_DN5680_c0_g1	4.56525	up	9.92e-49	PREDICTED: probable pectinesterase/pectinesterase inhibitor 12 [Beta vulgaris subsp. vulgaris]
carbohydrate metabolic process	TRINITY_DN21974_c0_g1	2.09113	up	1.2e-16	PREDICTED: pectinesterase/pectinesterase inhibitor PPE8B [Beta vulgaris subsp. vulgaris]
carbohydrate metabolic process	TRINITY_DN50951_c0_g2	6.06667	up	0.000445356	pectinesterase-like [Chenopodium quinoa]
carbohydrate metabolic process	TRINITY_DN6078_c0_g1	3.32889	up	9.21e-18	probable pectinesterase 53 isoform X1 [Chenopodium quinoa]
carbohydrate metabolic process	TRINITY_DN74782_c0_g1	2.72899	up	2.35e-06	probable pectinesterase 53 [Spinacia oleracea]
carbohydrate metabolic process	TRINITY_DN4991_c0_g1	3.04821	up	0.012217	putative pectinesterase 11 [Spinacia oleracea]
carbohydrate metabolic process	TRINITY_DN21701_c0_g1	-1.37134	down	0.0109232	PREDICTED: probable pectinesterase/pectinesterase inhibitor 25 [Beta vulgaris subsp. vulgaris]
carbohydrate metabolic process	TRINITY_DN75143_c0_g1	4.9677	up	0.0236546	PREDICTED: probable pectinesterase 68 [Beta vulgaris subsp. vulgaris]
carbohydrate metabolic process	TRINITY_DN5593_c0_g1	3.5783	up	1.56e-11	polygalacturonase-like [Chenopodium quinoa]
carbohydrate metabolic process	TRINITY_DN6193_c0_g1	10.4841	up	1.74e-16	PREDICTED: polygalacturonase-like [Beta vulgaris subsp. vulgaris]
carbohydrate metabolic process	TRINITY_DN20802_c0_g1	1.43356	up	0.0272688	probable polygalacturonase At1g80170 [Chenopodium quinoa]
carbohydrate metabolic process	TRINITY_DN16803_c0_g2	3.22259	up	1.48e-16	polygalacturonase At1g48100-like [Chenopodium quinoa]
carbohydrate metabolic process	TRINITY_DN3900_c0_g1	1.37427	up	8.29e-13	PREDICTED: probable polygalacturonase [Beta vulgaris subsp. vulgaris]
carbohydrate metabolic process	TRINITY_DN58043_c0_g1	1.68373	up	5.28e-12	PREDICTED: polygalacturonase-like [Beta vulgaris subsp. vulgaris]
carbohydrate metabolic process	TRINITY_DN3641_c1_g1	1.45667	up	1.11e-10	probable polygalacturonase [Chenopodium quinoa]
carbohydrate metabolic process	TRINITY_DN11244_c0_g1	10.391	up	9.1e-38	polygalacturonase-like [Spinacia oleracea]
carbohydrate metabolic process	TRINITY_DN6398_c0_g1	2.37927	up	1.07e-10	PREDICTED: probable polygalacturonase isoform X2 [Beta vulgaris subsp. vulgaris]
carbohydrate metabolic process	TRINITY_DN25741_c0_g2	9.73719	up	4.65e-08	polygalacturonase-like [Chenopodium quinoa]
carbohydrate metabolic process	TRINITY_DN4724_c1_g1	1.1518	up	1.74e-06	probable polygalacturonase [Chenopodium quinoa]
carbohydrate metabolic process	TRINITY_DN15582_c0_g1	3.96126	up	0.00288472	polygalacturonase At1g48100-like [Chenopodium quinoa]
carbohydrate metabolic process	TRINITY_DN16572_c0_g2	6.41397	up	1.23e-05	polygalacturonase At1g48100 [Chenopodium quinoa]
carbohydrate metabolic process	TRINITY_DN32575_c0_g1	8.5517	up	3.73e-10	polygalacturonase-like [Chenopodium quinoa]
carbohydrate metabolic process	TRINITY_DN11826_c0_g1	1.8416	up	0.00186497	acidic endochitinase WIN6.2B-like, partial [Quercus suber]
carbohydrate metabolic process	TRINITY_DN19090_c0_g1	6.82544	up	9.46e-06	acidic endochitinase-like [Chenopodium quinoa]
carbohydrate metabolic process	TRINITY_DN55646_c0_g1	3.04345	up	0.00740355	acidic endochitinase SE2 [Spinacia oleracea]
carbohydrate metabolic process	TRINITY_DN6173_c0_g1	3.83772	up	0.000201637	acidic endochitinase SP2-like [Chenopodium quinoa]
carbohydrate metabolic process	TRINITY_DN30735_c0_g1	5.78895	up	3.45e-22	PREDICTED: acidic endochitinase [Beta vulgaris subsp. vulgaris]
carbohydrate metabolic process	TRINITY_DN3265_c0_g2	5.36587	up	8.7e-106	endochitinase EP3-like [Chenopodium quinoa]
carbohydrate metabolic process	TRINITY_DN36500_c0_g2	5.50376	up	0.00575166	endochitinase A1-like [Quercus suber]
carbohydrate metabolic process	TRINITY_DN49720_c0_g1	5.49298	up	0.00892375	endochitinase EP3-like [Chenopodium quinoa]
carbohydrate metabolic process	TRINITY_DN8208_c0_g1	5.24956	up	0.0118119	PREDICTED: endochitinase EP3 [Beta vulgaris subsp. vulgaris]
carbohydrate metabolic process	TRINITY_DN3265_c0_g1	6.9453	up	4.61e-92	PREDICTED: endochitinase EP3 [Beta vulgaris subsp. vulgaris]
carbohydrate metabolic process	TRINITY_DN1173_c1_g2	3.05613	up	3.44e-08	basic endochitinase-like [Chenopodium quinoa]
carbohydrate metabolic process	TRINITY_DN15533_c0_g1	8.42042	up	1.15e-32	PREDICTED: endochitinase EP3 [Beta vulgaris subsp. vulgaris]
carbohydrate metabolic process	TRINITY_DN66627_c0_g1	1.11168	up	0.00486148	chitinase domain-containing protein 1-like [Chenopodium quinoa]
carbohydrate metabolic process	TRINITY_DN61373_c0_g1	7.23302	up	2.98e-102	chitinase [Chenopodium amaranticolor]
carbohydrate metabolic process	TRINITY_DN4881_c0_g1	3.31299	up	3.1e-39	chitinase-3-like protein 1 [Chenopodium quinoa]
carbohydrate metabolic process	TRINITY_DN1335_c0_g1	6.13382	up	1.78e-17	PREDICTED: chitotriosidase-1 [Beta vulgaris subsp. vulgaris]
carbohydrate metabolic process	TRINITY_DN5732_c0_g1	2.55925	up	2.35e-11	probable xyloglucan endotransglucosylase/hydrolase protein 32 [Chenopodium quinoa]
carbohydrate metabolic process	TRINITY_DN6994_c0_g1	7.40511	up	3.05e-161	probable xyloglucan endotransglucosylase/hydrolase protein 23 [Chenopodium quinoa]
carbohydrate metabolic process	TRINITY_DN4215_c0_g1	4.7118	up	5.96e-56	PREDICTED: probable xyloglucan endotransglucosylase/hydrolase protein 23 [Beta vulgaris subsp. vulgaris]
carbohydrate metabolic process	TRINITY_DN14750_c0_g1	9.15833	up	1e-30	probable xyloglucan endotransglucosylase/hydrolase protein 16 [Chenopodium quinoa]
carbohydrate metabolic process	TRINITY_DN40587_c0_g1	6.14935	up	0.000298756	probable xyloglucan endotransglucosylase/hydrolase protein 23 [Chenopodium quinoa]
carbohydrate metabolic process	TRINITY_DN7272_c0_g2	6.5787	up	3.65e-05	PREDICTED: probable xyloglucan endotransglucosylase/hydrolase protein 23 [Beta vulgaris subsp. vulgaris]
carbohydrate metabolic process	TRINITY_DN45986_c0_g1	7.85464	up	6.84e-08	probable xyloglucan endotransglucosylase/hydrolase protein 16 [Spinacia oleracea]
carbohydrate metabolic process	TRINITY_DN42413_c1_g1	3.40205	up	9.35e-48	PREDICTED: probable xyloglucan endotransglucosylase/hydrolase protein 30 [Beta vulgaris subsp. vulgaris]
carbohydrate metabolic process	TRINITY_DN6994_c0_g2	5.21756	up	9.47e-78	probable xyloglucan endotransglucosylase/hydrolase protein 23 [Chenopodium quinoa]
carbohydrate metabolic process	TRINITY_DN874_c0_g1	1.43917	up	2.7e-13	PREDICTED: probable xyloglucan endotransglucosylase/hydrolase protein 8 [Beta vulgaris subsp. vulgaris]
carbohydrate metabolic process	TRINITY_DN5705_c0_g1	2.2719	up	7.75e-15	probable xyloglucan endotransglucosylase/hydrolase protein 23 isoform X1 [Spinacia oleracea]
carbohydrate metabolic process	TRINITY_DN1652_c0_g1	-4.20908	down	3.69e-09	probable xyloglucan endotransglucosylase/hydrolase protein 25 [Spinacia oleracea]
carbohydrate metabolic process	TRINITY_DN7272_c1_g1	4.98352	up	0.0256733	probable xyloglucan endotransglucosylase/hydrolase protein 23 [Chenopodium quinoa]
carbohydrate metabolic process	TRINITY_DN11538_c0_g1	5.87993	up	0.00196621	probable xyloglucan endotransglucosylase/hydrolase protein 33 [Spinacia oleracea]
carbohydrate metabolic process	TRINITY_DN64392_c1_g1	-3.20807	down	0.0340702	PREDICTED: xyloglucan endotransglucosylase/hydrolase protein 24 [Beta vulgaris subsp. vulgaris]
carbohydrate metabolic process	TRINITY_DN11967_c0_g1	10.6739	up	5.95e-52	xyloglucan endotransglucosylase/hydrolase protein 24-like [Chenopodium quinoa]
carbohydrate metabolic process	TRINITY_DN27341_c0_g1	5.75357	up	0.0109311	xyloglucan endotransglucosylase/hydrolase protein 24-like [Chenopodium quinoa]
carbohydrate metabolic process	TRINITY_DN40370_c0_g1	3.65495	up	2.21e-84	xyloglucan endotransglucosylase/hydrolase 2-like [Chenopodium quinoa]
carbohydrate metabolic process	TRINITY_DN1639_c0_g1	2.05437	up	2.58e-19	PREDICTED: protein ALTERED XYLOGLUCAN 4 [Beta vulgaris subsp. vulgaris]
carbohydrate metabolic process	TRINITY_DN27705_c0_g3	3.22351	up	2.52e-06	protein ALTERED XYLOGLUCAN 4-like [Spinacia oleracea]
carbohydrate metabolic process	TRINITY_DN73455_c0_g1	6.70798	up	1.6e-05	xyloglucan:xyloglucosyl transferase [Vigna unguiculata]
carbohydrate metabolic process	TRINITY_DN29205_c0_g1	4.82435	up	0.0349318	pectin methylesterase [Vitis riparia]
carbohydrate metabolic process	TRINITY_DN29205_c0_g2	4.83705	up	0.0465945	pectin methylesterase [Vitis riparia]
carbohydrate metabolic process	TRINITY_DN8843_c0_g1	7.38458	up	8.24e-07	endoglucanase 1-like [Spinacia oleracea]
carbohydrate metabolic process	TRINITY_DN5891_c0_g1	5.43702	up	3.43e-38	PREDICTED: endoglucanase 17 [Beta vulgaris subsp. vulgaris]
carbohydrate metabolic process	TRINITY_DN4567_c0_g1	8.42365	up	5.08e-44	LOW QUALITY PROTEIN: endoglucanase 8-like [Chenopodium quinoa]
carbohydrate metabolic process	TRINITY_DN20159_c0_g1	7.33604	up	1.14e-34	endoglucanase 6-like [Chenopodium quinoa]
carbohydrate metabolic process	TRINITY_DN23201_c0_g1	9.9951	up	1.17e-23	endoglucanase-like [Spinacia oleracea]
carbohydrate metabolic process	TRINITY_DN17458_c0_g1	4.27523	up	1.08e-12	PREDICTED: endoglucanase 12 [Beta vulgaris subsp. vulgaris]
carbohydrate metabolic process	TRINITY_DN26685_c0_g1	2.5535	up	4.65e-16	PREDICTED: alpha-xylosidase 1 [Beta vulgaris subsp. vulgaris]
carbohydrate metabolic process	TRINITY_DN56159_c0_g3	5.162	up	0.0042237	beta-xylosidase, putative, partial [Ricinus communis]
carbohydrate metabolic process	TRINITY_DN8868_c0_g1	6.51877	up	7.99e-133	PREDICTED: probable beta-D-xylosidase 2 [Beta vulgaris subsp. vulgaris]
carbohydrate metabolic process	TRINITY_DN60465_c0_g1	5.07702	up	0.0465415	beta-xylosidase, putative, partial [Ricinus communis]
carbohydrate metabolic process	TRINITY_DN3143_c1_g1	3.073	up	6.84e-24	LOW QUALITY PROTEIN: probable beta-D-xylosidase 7 [Chenopodium quinoa]
carbohydrate metabolic process	TRINITY_DN27149_c0_g1	3.73684	up	8.79e-101	PREDICTED: beta-xylosidase/alpha-L-arabinofuranosidase 2 [Beta vulgaris subsp. vulgaris]
carbohydrate metabolic process	TRINITY_DN57350_c0_g1	3.00546	up	2.49e-11	PREDICTED: beta-D-xylosidase 1 [Beta vulgaris subsp. vulgaris]
carbohydrate metabolic process	TRINITY_DN23_c0_g1	-1.11573	down	9.88e-09	alpha-glucan phosphorylase 2, cytosolic [Chenopodium quinoa]
carbohydrate metabolic process	TRINITY_DN17969_c0_g1	-1.48912	down	5.92e-16	1,4-alpha-glucan-branching enzyme 2-2, chloroplastic/amyloplastic-like [Chenopodium quinoa]
carbohydrate metabolic process	TRINITY_DN34936_c0_g1	1.49791	up	1.48e-08	PREDICTED: 1,4-alpha-glucan-branching enzyme 3, chloroplastic/amyloplastic [Beta vulgaris subsp. vulgaris]
carbohydrate metabolic process	TRINITY_DN45497_c0_g1	1.40907	up	2.76e-09	PREDICTED: phosphoglucan phosphatase LSF2, chloroplastic [Beta vulgaris subsp. vulgaris]
carbohydrate metabolic process	TRINITY_DN16934_c0_g2	-1.70096	down	6.85e-28	phosphoglucan phosphatase DSP4, amyloplastic-like [Chenopodium quinoa]
carbohydrate metabolic process	TRINITY_DN6565_c0_g1	4.79716	up	2.38e-17	glucuronoxylan 4-O-methyltransferase 3-like [Chenopodium quinoa]
carbohydrate metabolic process	TRINITY_DN3793_c0_g1	4.6035	up	8.3e-26	glucuronoxylan 4-O-methyltransferase 1-like [Chenopodium quinoa]
carbohydrate metabolic process	TRINITY_DN7002_c0_g1	1.80942	up	8.7e-11	probable methyltransferase At1g27930 [Chenopodium quinoa]
carbohydrate metabolic process	TRINITY_DN13610_c0_g1	-1.67407	down	4.29e-16	probable methyltransferase At1g27930 [Spinacia oleracea]
carbohydrate metabolic process	TRINITY_DN12641_c0_g1	1.3076	up	1.14e-09	xyloglucan 6-xylosyltransferase 2-like [Chenopodium quinoa]
carbohydrate metabolic process	TRINITY_DN12961_c0_g1	2.77534	up	4.32e-06	probable beta-1,4-xylosyltransferase IRX9 [Chenopodium quinoa]
carbohydrate metabolic process	TRINITY_DN55672_c0_g1	6.8986	up	5.52e-06	PREDICTED: probable xyloglucan 6-xylosyltransferase 5 [Beta vulgaris subsp. vulgaris]
carbohydrate metabolic process	TRINITY_DN331_c0_g2	1.99516	up	2.27e-11	PREDICTED: UDP-D-xylose:L-fucose alpha-1,3-D-xylosyltransferase MGP4 [Beta vulgaris subsp. vulgaris]
carbohydrate metabolic process	TRINITY_DN6353_c0_g1	1.91706	up	2.48e-20	probable beta-1,4-xylosyltransferase IRX14 [Chenopodium quinoa]
carbohydrate metabolic process	TRINITY_DN5811_c0_g2	1.58917	up	5.69e-12	PREDICTED: probable beta-1,4-xylosyltransferase IRX10L [Beta vulgaris subsp. vulgaris]
carbohydrate metabolic process	TRINITY_DN4014_c0_g1	1.10522	up	1.13e-09	probable beta-1,4-xylosyltransferase IRX9H [Chenopodium quinoa]
carbohydrate metabolic process	TRINITY_DN3710_c0_g2	3.21475	up	9.23e-18	probable pectate lyase 8 [Chenopodium quinoa]
carbohydrate metabolic process	TRINITY_DN1880_c0_g1	1.03081	up	1.54e-09	PREDICTED: probable pectate lyase 5 [Beta vulgaris subsp. vulgaris]
carbohydrate metabolic process	TRINITY_DN49018_c0_g1	3.84688	up	1.41e-18	probable pectate lyase 8 [Chenopodium quinoa]
carbohydrate metabolic process	TRINITY_DN13082_c0_g2	5.2284	up	2.02e-62	probable pectate lyase 18 [Chenopodium quinoa]
carbohydrate metabolic process	TRINITY_DN27388_c0_g1	4.74049	up	0.049692	putative pectate lyase 21 [Eutrema salsugineum]
carbohydrate metabolic process	TRINITY_DN6234_c0_g1	-1.69181	down	3.24e-12	probable alpha,alpha-trehalose-phosphate synthase [UDP-forming] 9 isoform X1 [Chenopodium quinoa]
carbohydrate metabolic process	TRINITY_DN9189_c0_g1	1.40147	up	2.59e-09	alpha,alpha-trehalose-phosphate synthase [UDP-forming] 5-like [Chenopodium quinoa]
carbohydrate metabolic process	TRINITY_DN3732_c0_g1	1.4276	up	3.95e-07	alpha,alpha-trehalose-phosphate synthase [UDP-forming] 1-like isoform X2 [Spinacia oleracea]
carbohydrate metabolic process	TRINITY_DN43567_c0_g1	2.42972	up	4.35e-06	PREDICTED: probable trehalose-phosphate phosphatase F [Beta vulgaris subsp. vulgaris]
carbohydrate metabolic process	TRINITY_DN29875_c0_g1	5.17092	up	0.0132266	probable trehalose-phosphate phosphatase D [Chenopodium quinoa]
carbohydrate metabolic process	TRINITY_DN2392_c0_g1	2.07668	up	0.000143263	PREDICTED: probable trehalose-phosphate phosphatase C isoform X2 [Beta vulgaris subsp. vulgaris]
carbohydrate metabolic process	TRINITY_DN5_c1_g2	1.53134	up	7.88e-08	PREDICTED: trehalose-phosphate phosphatase A [Beta vulgaris subsp. vulgaris]
carbohydrate metabolic process	TRINITY_DN31511_c0_g2	6.72085	up	0.000178178	inositol-3-phosphate synthase 1-like [Quercus suber]
carbohydrate metabolic process	TRINITY_DN2127_c0_g1	-2.34897	down	5.82e-25	rhamnogalacturonate lyase B [Spinacia oleracea]
carbohydrate metabolic process	TRINITY_DN20135_c0_g1	1.93644	up	2.66e-06	probable rhamnogalacturonate lyase B isoform X2 [Spinacia oleracea]
carbohydrate metabolic process	TRINITY_DN5874_c0_g1	-1.1211	down	3.69e-05	PREDICTED: probable alkaline/neutral invertase B [Beta vulgaris subsp. vulgaris]
carbohydrate metabolic process	TRINITY_DN15355_c0_g1	1.26294	up	1.78e-06	probable alkaline/neutral invertase D [Chenopodium quinoa]
carbohydrate metabolic process	TRINITY_DN1303_c0_g1	3.8271	up	7.45e-15	acid beta-fructofuranosidase-like [Chenopodium quinoa]
carbohydrate metabolic process	TRINITY_DN11073_c0_g1	5.35213	up	2.14e-204	acid beta-fructofuranosidase-like isoform X2 [Spinacia oleracea]
carbohydrate metabolic process	TRINITY_DN6860_c0_g1	-1.8221	down	9.72e-23	PREDICTED: sterol 3-beta-glucosyltransferase UGT80A2 [Beta vulgaris subsp. vulgaris]
carbohydrate metabolic process	TRINITY_DN4449_c0_g1	-2.19591	down	2.52e-29	sterol 3-beta-glucosyltransferase UGT80A2 [Spinacia oleracea]
carbohydrate metabolic process	TRINITY_DN4517_c0_g1	7.84475	up	2.1e-17	sterol 3-beta-glucosyltransferase UGT80B1-like isoform X1 [Spinacia oleracea]
carbohydrate metabolic process	TRINITY_DN46401_c0_g1	-4.2082	down	5.89e-08	cyanidin 3-O-glucoside 5-O-glucosyltransferase (acyl-glucose)-like [Chenopodium quinoa]
carbohydrate metabolic process	TRINITY_DN12627_c0_g2	-1.64879	down	9.54e-07	probable receptor-like serine/threonine-protein kinase At4g34500 [Chenopodium quinoa]
carbohydrate metabolic process	TRINITY_DN14774_c0_g2	-1.57509	down	0.0168868	PREDICTED: serine/threonine-protein kinase SRK2I [Beta vulgaris subsp. vulgaris]
carbohydrate metabolic process	TRINITY_DN2698_c0_g1	1.6858	up	1.52e-10	probable galacturonosyltransferase-like 1 [Chenopodium quinoa]
carbohydrate metabolic process	TRINITY_DN53942_c0_g1	1.49581	up	2.36e-13	probable galacturonosyltransferase 7 isoform X1 [Spinacia oleracea]
carbohydrate metabolic process	TRINITY_DN16132_c0_g1	1.41287	up	3.2e-05	Putative gag-pol polyprotein, identical [Solanum demissum]
carbohydrate metabolic process	TRINITY_DN470_c0_g2	1.85024	up	1.76e-08	Putative gag-pol polyprotein, identical [Solanum demissum]
carbohydrate metabolic process	TRINITY_DN37009_c0_g1	4.93759	up	0.0332826	fructan 6-exohydrolase-like [Chenopodium quinoa]
carbohydrate metabolic process	TRINITY_DN15748_c0_g1	5.38093	up	4.73e-14	fructan 6-exohydrolase-like [Chenopodium quinoa]
carbohydrate metabolic process	TRINITY_DN318_c0_g1	2.70527	up	1.11e-39	beta-hexosaminidase 3 [Spinacia oleracea]
carbohydrate metabolic process	TRINITY_DN1676_c0_g2	1.05115	up	7.44e-07	beta-hexosaminidase 1-like [Chenopodium quinoa]
carbohydrate metabolic process	TRINITY_DN6163_c0_g1	1.07476	up	0.000444173	PAP-specific phosphatase HAL2-like [Spinacia oleracea]
carbohydrate metabolic process	TRINITY_DN15067_c0_g1	1.37289	up	0.00421213	PAP-specific phosphatase HAL2-like [Chenopodium quinoa]
carbohydrate metabolic process	TRINITY_DN567_c0_g1	-1.67036	down	1.22e-08	Protein REDUCED WALL ACETYLATION 1 [Zea mays]
carbohydrate metabolic process	TRINITY_DN5735_c0_g1	1.14981	up	1.07e-11	protein REDUCED WALL ACETYLATION 3-like [Chenopodium quinoa]
carbohydrate metabolic process	TRINITY_DN9890_c0_g1	2.96514	up	7.05e-41	pyruvate kinase isozyme G, chloroplastic [Spinacia oleracea]
carbohydrate metabolic process	TRINITY_DN18262_c0_g1	1.03826	up	0.00115661	pyruvate kinase isozyme G, chloroplastic-like [Spinacia oleracea]
carbohydrate metabolic process	TRINITY_DN13856_c0_g1	3.32822	up	4.2e-11	pyruvate carboxylase-like [Quercus suber]
carbohydrate metabolic process	TRINITY_DN16280_c0_g1	1.09709	up	3.33e-06	PREDICTED: protein IRX15-LIKE [Beta vulgaris subsp. vulgaris]
carbohydrate metabolic process	TRINITY_DN7313_c0_g1	2.19096	up	7.42e-27	sedoheptulose-1,7-bisphosphatase, chloroplastic-like [Chenopodium quinoa]
carbohydrate metabolic process	TRINITY_DN4056_c0_g2	3.38731	up	6.44e-35	1,4-dihydroxy-2-naphthoyl-CoA synthase, peroxisomal-like [Chenopodium quinoa]
carbohydrate metabolic process	TRINITY_DN12931_c0_g1	6.94098	up	1.19e-11	alcohol dehydrogenase 1-like [Quercus suber]
carbohydrate metabolic process	TRINITY_DN5855_c0_g1	-3.54417	down	9.77e-14	PREDICTED: antimicrobial peptide Ar-AMP [Beta vulgaris subsp. vulgaris]
carbohydrate metabolic process	TRINITY_DN15039_c0_g2	-2.76242	down	0.00128987	putative pre-mRNA-processing factor 6-like [Capsicum annuum]
carbohydrate metabolic process	TRINITY_DN836_c0_g2	1.01489	up	1.67e-05	phosphoribulokinase, chloroplastic [Chenopodium quinoa]
carbohydrate metabolic process	TRINITY_DN26355_c0_g3	1.15802	up	8.08e-05	PREDICTED: methyl-CpG-binding domain-containing protein 5 [Beta vulgaris subsp. vulgaris]
carbohydrate metabolic process	TRINITY_DN11288_c0_g1	2.04743	up	0.00561122	2,3-bisphosphoglycerate-independent phosphoglycerate mutase-like [Quercus suber]
carbohydrate metabolic process	TRINITY_DN3228_c2_g1	1.34565	up	0.0384259	phosphoglycerate kinase 3, cytosolic [Chenopodium quinoa]
carbohydrate metabolic process	TRINITY_DN12761_c0_g1	-3.25997	down	1.42e-10	PREDICTED: probable fructokinase-5 [Beta vulgaris subsp. vulgaris]
carbohydrate metabolic process	TRINITY_DN65324_c0_g4	1.29567	up	1.01e-08	PREDICTED: callose synthase 7 [Beta vulgaris subsp. vulgaris]
carbohydrate metabolic process	TRINITY_DN796_c0_g1	-1.50742	down	9.42e-12	transcription initiation factor TFIID subunit 7-like isoform X2 [Chenopodium quinoa]
carbohydrate metabolic process	TRINITY_DN18304_c0_g3	-5.84886	down	1.33e-10	Protein YLS3 [Glycine soja]
carbohydrate metabolic process	TRINITY_DN6587_c0_g1	-1.53973	down	0.038194	DNA-directed RNA polymerases II, IV and V subunit 12 [Cannabis sativa]
carbohydrate metabolic process	TRINITY_DN7701_c0_g2	1.59896	up	0.00250413	thylakoid lumenal 29 kDa protein, chloroplastic-like [Chenopodium quinoa]
carbohydrate metabolic process	TRINITY_DN17013_c0_g1	-1.47002	down	8.93e-14	BAG family molecular chaperone regulator 5, mitochondrial [Spinacia oleracea]
carbohydrate metabolic process	TRINITY_DN722_c0_g1	1.34382	up	2.42e-11	transketolase, chloroplastic [Chenopodium quinoa]
carbohydrate metabolic process	TRINITY_DN7903_c0_g1	3.25314	up	4.63e-21	inositol-tetrakisphosphate 1-kinase 1-like [Chenopodium quinoa]
carbohydrate metabolic process	TRINITY_DN6520_c0_g1	5.46643	up	1.8e-25	PREDICTED: chloroplast stem-loop binding protein of 41 kDa a, chloroplastic [Beta vulgaris subsp. vulgaris]
carbohydrate metabolic process	TRINITY_DN5028_c0_g1	1.65944	up	2.79e-06	probable gluconokinase isoform X3 [Spinacia oleracea]
carbohydrate metabolic process	TRINITY_DN1985_c0_g1	1.08141	up	2.01e-06	PREDICTED: protein NDH-DEPENDENT CYCLIC ELECTRON FLOW 5 [Beta vulgaris subsp. vulgaris]
carbohydrate metabolic process	TRINITY_DN8016_c0_g1	1.73976	up	1.27e-16	PREDICTED: probable arabinose 5-phosphate isomerase [Beta vulgaris subsp. vulgaris]
carbohydrate metabolic process	TRINITY_DN24869_c0_g1	1.60307	up	1.91e-17	inositol monophosphatase [Chenopodium quinoa]
carbohydrate metabolic process	TRINITY_DN7265_c0_g1	1.0581	up	8.03e-07	UDP-glucuronic acid decarboxylase 2-like [Chenopodium quinoa]
carbohydrate metabolic process	TRINITY_DN19099_c0_g1	5.90577	up	4.78e-44	L-lactate dehydrogenase B-like [Chenopodium quinoa]
carbohydrate metabolic process	TRINITY_DN28650_c0_g1	4.27323	up	0.0362494	probable glycosidase crf1 [Quercus suber]
carbohydrate metabolic process	TRINITY_DN44973_c0_g1	1.30064	up	6.15e-05	PREDICTED: pentatricopeptide repeat-containing protein At3g13880 [Beta vulgaris subsp. vulgaris]
carbohydrate metabolic process	TRINITY_DN236_c1_g2	-2.10833	down	0.00580955	putative reverse transcriptase family member [Malus domestica]
carbohydrate metabolic process	TRINITY_DN6188_c0_g1	-1.14135	down	9.36e-12	PREDICTED: triosephosphate isomerase, cytosolic [Beta vulgaris subsp. vulgaris]
carbohydrate metabolic process	TRINITY_DN958_c0_g1	2.19039	up	6.15e-27	galacturonokinase [Spinacia oleracea]
carbohydrate metabolic process	TRINITY_DN1173_c1_g1	2.92977	up	1.61e-37	Glycoside hydrolase, family 19, catalytic [Corchorus capsularis]
carbohydrate metabolic process	TRINITY_DN18648_c0_g1	3.19991	up	0.000570497	L-galactonate dehydratase-like [Quercus suber]
carbohydrate metabolic process	TRINITY_DN16414_c0_g1	1.67526	up	6.22e-17	probable trehalase [Chenopodium quinoa]
carbohydrate metabolic process	TRINITY_DN30840_c0_g1	1.01878	up	9.27e-05	ADP-glucose phosphorylase-like [Chenopodium quinoa]
carbohydrate metabolic process	TRINITY_DN13561_c0_g1	1.28164	up	0.0127031	enolase-like [Quercus suber]
carbohydrate metabolic process	TRINITY_DN73777_c0_g1	5.55051	up	0.000594485	increased DNA methylation 2-like [Spinacia oleracea]
carbohydrate metabolic process	TRINITY_DN3328_c1_g1	-5.91004	down	0.0016833	F-box protein PP2-A15 [Capsicum annuum]
carbohydrate metabolic process	TRINITY_DN8041_c0_g2	1.2574	up	1.39e-06	uncharacterized protein LOC110777747 isoform X1 [Spinacia oleracea]
carbohydrate metabolic process	TRINITY_DN1120_c0_g2	1.95998	up	4.32e-27	PREDICTED: protein FAM91A1 isoform X1 [Beta vulgaris subsp. vulgaris]
carbohydrate metabolic process	TRINITY_DN9175_c0_g1	7.96062	up	1.61e-08	uncharacterized protein LOC113283415 isoform X1 [Papaver somniferum]
carbohydrate metabolic process	TRINITY_DN5851_c0_g2	-4.5062	down	2.86e-11	uncharacterized protein LOC110712057 [Chenopodium quinoa]
carbohydrate metabolic process	TRINITY_DN19144_c0_g2	2.83441	up	2.3e-12	PREDICTED: uncharacterized protein LOC104894964 [Beta vulgaris subsp. vulgaris]
carbohydrate metabolic process	TRINITY_DN29890_c0_g2	-1.40666	down	5.27e-14	PREDICTED: uncharacterized protein At1g04910 [Beta vulgaris subsp. vulgaris]
carbohydrate metabolic process	TRINITY_DN56359_c0_g1	5.17508	up	2.32e-05	PREDICTED: uncharacterized protein LOC104904865 [Beta vulgaris subsp. vulgaris]
carbohydrate metabolic process	TRINITY_DN13033_c0_g1	5.92554	up	1.22e-05	PREDICTED: uncharacterized protein LOC109135832 [Beta vulgaris subsp. vulgaris]
carbohydrate metabolic process	TRINITY_DN43619_c1_g4	5.36034	up	0.0107595	uncharacterized protein LOC8270168, partial [Ricinus communis]
carbohydrate metabolic process	TRINITY_DN15811_c0_g1	1.31543	up	1.25e-12	PREDICTED: uncharacterized protein LOC104900699 [Beta vulgaris subsp. vulgaris]
carbohydrate metabolic process	TRINITY_DN6789_c0_g1	-1.42005	down	2.71e-09	uncharacterized protein LOC111316811 [Durio zibethinus]
carbohydrate metabolic process	TRINITY_DN3001_c0_g2	1.19095	up	1e-06	PREDICTED: uncharacterized protein LOC104903945 [Beta vulgaris subsp. vulgaris]
carbohydrate metabolic process	TRINITY_DN3001_c0_g1	1.68483	up	0.0253775	LOW QUALITY PROTEIN: uncharacterized protein LOC110778699 [Spinacia oleracea]
carbohydrate metabolic process	TRINITY_DN2420_c0_g1	2.90803	up	5.37e-31	uncharacterized protein At1g04910-like isoform X2 [Chenopodium quinoa]
carbohydrate metabolic process	TRINITY_DN3446_c0_g1	1.2924	up	8.35e-16	uncharacterized protein At1g04910-like [Spinacia oleracea]
carbohydrate metabolic process	TRINITY_DN412_c1_g1	-3.46511	down	1.41e-08	PREDICTED: uncharacterized protein LOC109136237 [Beta vulgaris subsp. vulgaris]
carbohydrate metabolic process	TRINITY_DN6699_c0_g1	1.73741	up	6.9e-16	uncharacterized protein LOC110800718 [Spinacia oleracea]
carbohydrate metabolic process	TRINITY_DN2852_c0_g1	1.05747	up	2.11e-05	uncharacterized protein LOC110720866 [Chenopodium quinoa]
carbohydrate metabolic process	TRINITY_DN4931_c0_g1	2.14234	up	1.44e-07	PREDICTED: uncharacterized protein LOC104887990 isoform X2 [Beta vulgaris subsp. vulgaris]
carbohydrate metabolic process	TRINITY_DN15864_c1_g2	-1.48743	down	0.00677525	uncharacterized protein LOC110692850 [Chenopodium quinoa]
carbohydrate metabolic process	TRINITY_DN462_c0_g2	1.03637	up	2.75e-06	uncharacterized protein At1g04910-like isoform X2 [Chenopodium quinoa]
carbohydrate metabolic process	TRINITY_DN8605_c0_g1	1.24993	up	8.36e-08	uncharacterized protein At1g04910-like isoform X1 [Chenopodium quinoa]
carbohydrate metabolic process	TRINITY_DN46270_c0_g1	-2.68631	down	0.000534497	uncharacterized protein LOC110704370 [Chenopodium quinoa]
carbohydrate metabolic process	TRINITY_DN4031_c0_g1	-2.3953	down	9.8e-16	uncharacterized protein LOC110683530 [Chenopodium quinoa]
carbohydrate metabolic process	TRINITY_DN5264_c0_g1	3.15613	up	1.95e-15	uncharacterized protein LOC110793454 [Spinacia oleracea]
carbohydrate metabolic process	TRINITY_DN17653_c2_g1	-2.21639	down	0.00105909	PREDICTED: uncharacterized protein LOC109136237 [Beta vulgaris subsp. vulgaris]
carbohydrate metabolic process	TRINITY_DN64926_c0_g1	2.75874	up	5.58e-08	PREDICTED: uncharacterized protein At1g04910 isoform X1 [Beta vulgaris subsp. vulgaris]
carbohydrate metabolic process	TRINITY_DN303_c0_g2	-2.1248	down	3.6e-07	uncharacterized protein LOC110692850 [Chenopodium quinoa]
carbohydrate metabolic process	TRINITY_DN16965_c0_g3	-2.00914	down	1.06e-14	PREDICTED: uncharacterized protein LOC104886802 isoform X1 [Beta vulgaris subsp. vulgaris]
carbohydrate metabolic process	TRINITY_DN41354_c0_g1	1.92806	up	0.0188244	uncharacterized protein LOC110689536 [Chenopodium quinoa]
carbohydrate metabolic process	TRINITY_DN16397_c0_g3	-3.88413	down	0.000184128	uncharacterized protein LOC110692850 [Chenopodium quinoa]
carbohydrate metabolic process	TRINITY_DN37442_c0_g3	-3.86537	down	0.00301892	uncharacterized protein LOC110714726 [Chenopodium quinoa]
carbohydrate metabolic process	TRINITY_DN7640_c0_g1	-1.03152	down	7.77e-11	uncharacterized protein At1g04910 [Spinacia oleracea]
carbohydrate metabolic process	TRINITY_DN3799_c0_g1	1.5876	up	1.05e-15	uncharacterized protein LOC110731343 isoform X1 [Chenopodium quinoa]
carbohydrate metabolic process	TRINITY_DN60232_c0_g2	3.77868	up	0.0349882	uncharacterized protein LOC110718985 [Chenopodium quinoa]
carbohydrate metabolic process	TRINITY_DN882_c1_g1	-1.93922	down	2.18e-34	PREDICTED: uncharacterized protein At1g04910 [Beta vulgaris subsp. vulgaris]
carbohydrate metabolic process	TRINITY_DN10131_c0_g2	2.03104	up	1.21e-15	uncharacterized protein At1g04910-like [Chenopodium quinoa]
carbohydrate metabolic process	TRINITY_DN1291_c0_g1	1.69428	up	1.45e-15	uncharacterized protein LOC110785777 [Spinacia oleracea]
carbohydrate metabolic process	TRINITY_DN204_c1_g3	-1.10661	down	0.0244787	uncharacterized protein LOC110692850 [Chenopodium quinoa]
carbohydrate metabolic process	TRINITY_DN2226_c0_g3	-2.00353	down	9.88e-32	uncharacterized protein LOC110724576 [Chenopodium quinoa]
carbohydrate metabolic process	TRINITY_DN9460_c0_g1	1.45017	up	2.45e-09	uncharacterized protein PFB0145c-like [Chenopodium quinoa]
carbohydrate metabolic process	TRINITY_DN14070_c0_g1	-2.5607	down	0.000500549	uncharacterized protein LOC110798266 isoform X2 [Spinacia oleracea]
carbohydrate metabolic process	TRINITY_DN26133_c0_g2	-5.14283	down	0.00373528	uncharacterized protein LOC110692850 [Chenopodium quinoa]
carbohydrate metabolic process	TRINITY_DN1210_c0_g1	-2.52247	down	2.66e-29	uncharacterized protein LOC110718873 [Chenopodium quinoa]
carbohydrate metabolic process	TRINITY_DN10574_c0_g1	6.78168	up	9.72e-16	PREDICTED: uncharacterized protein LOC104901457 [Beta vulgaris subsp. vulgaris]
carbohydrate metabolic process	TRINITY_DN5737_c0_g1	6.5552	up	1.99e-09	uncharacterized protein LOC110807853 isoform X3 [Carica papaya]
carbohydrate metabolic process	TRINITY_DN5737_c0_g3	7.74903	up	0.0017085	uncharacterized protein LOC110807853 isoform X3 [Carica papaya]
carbohydrate metabolic process	TRINITY_DN5846_c0_g1	5.3501	up	8.22e-13	hypothetical protein BVRB_1g018800 [Beta vulgaris subsp. vulgaris]
carbohydrate metabolic process	TRINITY_DN17017_c0_g2	-2.74656	down	0.006012	hypothetical protein DVH24_022612 [Malus domestica]
carbohydrate metabolic process	TRINITY_DN27885_c0_g2	7.58401	up	1.06e-06	hypothetical protein FH972_023127 [Carpinus fangiana]
carbohydrate metabolic process	TRINITY_DN68760_c0_g1	2.48699	up	0.0423786	hypothetical protein FH972_025194 [Carpinus fangiana]
carbohydrate metabolic process	TRINITY_DN37879_c0_g1	1.46755	up	4.21e-05	hypothetical protein SOVF_065340 [Spinacia oleracea]
carbohydrate metabolic process	TRINITY_DN646_c2_g1	2.17245	up	1.9e-22	hypothetical protein SOVF_142220 [Spinacia oleracea]
carbohydrate metabolic process	TRINITY_DN34268_c0_g2	1.50036	up	3.87e-09	hypothetical protein SOVF_038400 [Spinacia oleracea]
carbohydrate metabolic process	TRINITY_DN6282_c0_g1	3.90049	up	1.6e-88	hypothetical protein MIMGU_mgv1a011868mg [Erythranthe guttata]
carbohydrate metabolic process	TRINITY_DN81299_c0_g1	7.71854	up	5.09e-07	hypothetical protein EZV62_023200 [Acer yangbiense]
carbohydrate metabolic process	TRINITY_DN14941_c0_g1	2.84815	up	3.41e-06	hypothetical protein SOVF_037320 [Spinacia oleracea]
carbohydrate metabolic process	TRINITY_DN15091_c2_g2	-2.46419	down	0.00253924	hypothetical protein FXO37_28740 [Capsicum annuum]
carbohydrate metabolic process	TRINITY_DN331_c0_g2	1.99516	up	2.27e-11	hypothetical protein C3L33_20675, partial [Rhododendron williamsianum]
carbohydrate metabolic process	TRINITY_DN5150_c0_g1	3.37247	up	1.04e-38	hypothetical protein SOVF_115900 isoform A [Spinacia oleracea]
carbohydrate metabolic process	TRINITY_DN71678_c1_g1	5.24642	up	0.0107865	hypothetical protein BVRB_6g151350 [Beta vulgaris subsp. vulgaris]
carbohydrate metabolic process	TRINITY_DN25583_c0_g1	-1.93393	down	1.47e-37	hypothetical protein BVRB_8g193450 [Beta vulgaris subsp. vulgaris]
carbohydrate metabolic process	TRINITY_DN35744_c0_g1	5.07052	up	0.0288659	hypothetical protein FH972_026099 [Carpinus fangiana]
carbohydrate metabolic process	TRINITY_DN14314_c0_g1	5.58614	up	1.28e-183	hypothetical protein SOVF_072030 [Spinacia oleracea]
carbohydrate metabolic process	TRINITY_DN10626_c0_g1	1.01846	up	0.00630333	hypothetical protein SOVF_076660 [Spinacia oleracea]
carbohydrate metabolic process	TRINITY_DN24728_c0_g1	-6.47838	down	0.000215724	hypothetical protein GH714_034605 [Hevea brasiliensis]
carbohydrate metabolic process	TRINITY_DN11484_c0_g1	7.43235	up	8.67e-08	hypothetical protein BVRB_3g065210 [Beta vulgaris subsp. vulgaris]
carbohydrate metabolic process	TRINITY_DN11901_c0_g1	1.94797	up	0.00862389	hypothetical protein FH972_021544 [Carpinus fangiana]
carbohydrate metabolic process	TRINITY_DN79984_c0_g1	6.53308	up	4.1e-05	hypothetical protein AXX17_ATUG04840 [Arabidopsis thaliana]
carbohydrate metabolic process	TRINITY_DN9007_c0_g1	2.3567	up	0.00389946	hypothetical protein FH972_022035 [Carpinus fangiana]
carbohydrate metabolic process	TRINITY_DN63713_c0_g1	6.85488	up	3.47e-05	hypothetical protein FH972_023192 [Carpinus fangiana]
carbohydrate metabolic process	TRINITY_DN7746_c0_g1	2.45025	up	9.01e-12	hypothetical protein BVRB_8g185970 isoform A [Beta vulgaris subsp. vulgaris]
carbohydrate metabolic process	TRINITY_DN21921_c0_g1	8.15063	up	3.49e-27	hypothetical protein SOVF_200910 [Spinacia oleracea]
carbohydrate metabolic process	TRINITY_DN20846_c0_g1	4.80867	up	0.036846	hypothetical protein TSUD_249600 [Trifolium subterraneum]
carbohydrate metabolic process	TRINITY_DN41656_c0_g1	5.97333	up	0.000616302	hypothetical protein AXX17_ATUG04840 [Arabidopsis thaliana]
carbohydrate metabolic process	TRINITY_DN58392_c0_g4	-1.43676	down	0.0353078	hypothetical protein SOVF_086370 [Spinacia oleracea]
carbohydrate metabolic process	TRINITY_DN69783_c0_g4	4.8875	up	0.035503	hypothetical protein ES319_A02G123800v1 [Gossypium barbadense]
carbohydrate metabolic process	TRINITY_DN3682_c0_g1	5.99365	up	2.76e-12	hypothetical protein FH972_021042 [Carpinus fangiana]
carbohydrate metabolic process	TRINITY_DN12760_c0_g1	7.75994	up	6.24e-08	hypothetical protein FH972_021042 [Carpinus fangiana]
carbohydrate metabolic process	TRINITY_DN7588_c0_g1	6.531	up	7.23e-05	hypothetical protein [Zea mays]
carbohydrate metabolic process	TRINITY_DN27174_c0_g1	5.91135	up	0.000393685	hypothetical protein BVRB_7g170570 [Beta vulgaris subsp. vulgaris]
carbohydrate metabolic process	TRINITY_DN15391_c0_g1	4.5219	up	0.0252428	hypothetical protein EZV62_018988 [Acer yangbiense]
carbohydrate metabolic process	TRINITY_DN55505_c0_g1	4.47455	up	0.0278613	hypothetical protein FH972_021337 [Carpinus fangiana]
carbohydrate metabolic process	TRINITY_DN23224_c0_g1	5.09711	up	0.00372941	hypothetical protein BVRB_3g052380 [Beta vulgaris subsp. vulgaris]
carbohydrate metabolic process	TRINITY_DN18577_c0_g1	1.34871	up	2.51e-10	hypothetical protein SOVF_114310 [Spinacia oleracea]
carbohydrate metabolic process	TRINITY_DN16527_c0_g1	5.94049	up	2.22e-06	hypothetical protein SOVF_074390 [Spinacia oleracea]
carbohydrate metabolic process	TRINITY_DN56735_c0_g1	4.96346	up	2.25e-05	hypothetical protein FH972_023459 [Carpinus fangiana]
carbohydrate metabolic process	TRINITY_DN10025_c0_g1	1.60142	up	0.000813087	hypothetical protein FH972_026114 [Carpinus fangiana]
carbohydrate metabolic process	TRINITY_DN35026_c0_g1	2.12396	up	0.000185555	hypothetical protein FH972_021928 [Carpinus fangiana]
carbohydrate metabolic process	TRINITY_DN26427_c0_g1	1.77009	up	0.00126514	hypothetical protein FH972_022520 [Carpinus fangiana]
carbohydrate metabolic process	TRINITY_DN8881_c0_g1	2.38831	up	9.81e-25	hypothetical protein SOVF_023630 [Spinacia oleracea]
carbohydrate metabolic process	TRINITY_DN40370_c0_g2	3.57316	up	3.33e-84	hypothetical protein SOVF_173740 [Spinacia oleracea]
carbohydrate metabolic process	TRINITY_DN69783_c0_g2	4.21502	up	0.00172602	unknown [Picea sitchensis]
carbohydrate metabolic process	TRINITY_DN65205_c0_g2	5.34386	up	0.00732331	unnamed protein product [Microthlaspi erraticum]
carbohydrate metabolic pathway in the SlG_C vs SlG_N group
carbohydrate metabolic process	TRINITY_DN28830_c0_g1	-3.01266	down	3.26e-07	phosphoenolpyruvate carboxykinase (ATP) [Quercus suber]
carbohydrate metabolic process	TRINITY_DN480_c0_g1	1.21403	up	2.79e-05	glucose-1-phosphate adenylyltransferase large subunit 3, chloroplastic/amyloplastic [Spinacia oleracea]
carbohydrate metabolic process	TRINITY_DN7313_c0_g1	1.14787	up	0.00824883	sedoheptulose-1,7-bisphosphatase, chloroplastic-like [Chenopodium quinoa]
carbohydrate metabolic process	TRINITY_DN17700_c0_g1	1.19496	up	0.000162007	fructose-bisphosphate aldolase 1, chloroplastic [Chenopodium quinoa]
carbohydrate metabolic process	TRINITY_DN15255_c0_g3	-3.51468	down	0.0110817	malate synthase, glyoxysomal-like [Quercus suber]
carbohydrate metabolic process	TRINITY_DN4032_c0_g1	3.47041	up	9.18e-05	ribulose bisphosphate carboxylase small chain 3, chloroplastic-like [Chenopodium quinoa]
carbohydrate metabolic process	TRINITY_DN6856_c0_g1	-1.55308	down	4.84e-05	PREDICTED: endochitinase A2 [Beta vulgaris subsp. vulgaris]
carbohydrate metabolic process	TRINITY_DN3265_c0_g2	-1.28073	down	1.24e-08	endochitinase EP3-like [Chenopodium quinoa]
carbohydrate metabolic process	TRINITY_DN19090_c0_g1	2.24239	up	0.000243842	acidic endochitinase-like [Chenopodium quinoa]
carbohydrate metabolic process	TRINITY_DN5891_c0_g1	2.09226	up	2.38e-07	PREDICTED: endoglucanase 17 [Beta vulgaris subsp. vulgaris]
carbohydrate metabolic process	TRINITY_DN4567_c0_g1	1.07238	up	0.0462592	LOW QUALITY PROTEIN: endoglucanase 8-like [Chenopodium quinoa]
carbohydrate metabolic process	TRINITY_DN23016_c0_g1	-1.88784	down	8.45e-09	PREDICTED: glucan endo-1,3-beta-glucosidase-like [Beta vulgaris subsp. vulgaris]
carbohydrate metabolic process	TRINITY_DN5132_c0_g1	-1.59345	down	1.73e-09	PREDICTED: glucan endo-1,3-beta-glucosidase [Beta vulgaris subsp. vulgaris]
carbohydrate metabolic process	TRINITY_DN3067_c1_g1	-1.37686	down	8.31e-11	glucan endo-1,3-beta-glucosidase-like [Chenopodium quinoa]
carbohydrate metabolic process	TRINITY_DN2082_c0_g2	-1.03652	down	0.0222721	probable glucan 1,3-beta-glucosidase A [Chenopodium quinoa]
carbohydrate metabolic process	TRINITY_DN2692_c0_g1	1.23204	up	0.00084656	probable glucan 1,3-beta-glucosidase A [Chenopodium quinoa]
carbohydrate metabolic process	TRINITY_DN9001_c0_g1	1.3506	up	0.00112622	beta-glucosidase 12-like [Chenopodium quinoa]
carbohydrate metabolic process	TRINITY_DN2338_c0_g1	1.15061	up	0.0159365	probable beta-D-xylosidase 5 [Spinacia oleracea]
carbohydrate metabolic process	TRINITY_DN57963_c0_g1	-5.38634	down	0.0167392	alpha-L-arabinofuranosidase A-like, partial [Quercus suber]
carbohydrate metabolic process	TRINITY_DN23953_c0_g3	-6.26887	down	0.00321912	arabinan endo-1,5-alpha-L-arabinosidase A-like [Quercus suber]
carbohydrate metabolic process	TRINITY_DN8429_c0_g1	-2.09039	down	0.000148328	arabinan endo-1,5-alpha-L-arabinosidase A-like [Quercus suber]
carbohydrate metabolic process	TRINITY_DN4611_c0_g1	1.02474	up	0.00466619	alpha-galactosidase-like isoform X1 [Chenopodium quinoa]
carbohydrate metabolic process	TRINITY_DN31465_c0_g2	-6.61679	down	0.000769651	probable glycosyltransferase At5g11130 [Spinacia oleracea]
carbohydrate metabolic process	TRINITY_DN6078_c0_g1	1.23158	up	0.00292035	probable pectinesterase 53 isoform X1 [Chenopodium quinoa]
carbohydrate metabolic process	TRINITY_DN4991_c0_g1	1.56114	up	0.0364912	putative pectinesterase 11 [Spinacia oleracea]
carbohydrate metabolic process	TRINITY_DN4831_c0_g1	-1.26719	down	0.010944	probable pectinesterase/pectinesterase inhibitor 41 [Chenopodium quinoa]
carbohydrate metabolic process	TRINITY_DN5680_c0_g1	-1.65193	down	5.68e-08	PREDICTED: probable pectinesterase/pectinesterase inhibitor 12 [Beta vulgaris subsp. vulgaris]
carbohydrate metabolic process	TRINITY_DN40370_c0_g1	-1.62421	down	4.58e-12	xyloglucan endotransglucosylase/hydrolase 2-like [Chenopodium quinoa]
carbohydrate metabolic process	TRINITY_DN6994_c0_g2	-1.62854	down	8.83e-06	probable xyloglucan endotransglucosylase/hydrolase protein 23 [Chenopodium quinoa]
carbohydrate metabolic process	TRINITY_DN6994_c0_g1	-1.30165	down	0.000740594	probable xyloglucan endotransglucosylase/hydrolase protein 23 [Chenopodium quinoa]
carbohydrate metabolic process	TRINITY_DN11967_c0_g1	-1.41162	down	1.29e-06	xyloglucan endotransglucosylase/hydrolase protein 24-like [Chenopodium quinoa]
carbohydrate metabolic process	TRINITY_DN4215_c0_g1	-2.38173	down	2.41e-20	PREDICTED: probable xyloglucan endotransglucosylase/hydrolase protein 23 [Beta vulgaris subsp. vulgaris]
carbohydrate metabolic process	TRINITY_DN16803_c0_g2	1.92519	up	1.37e-05	polygalacturonase At1g48100-like [Chenopodium quinoa]
carbohydrate metabolic process	TRINITY_DN5593_c0_g1	1.0937	up	0.0189697	polygalacturonase-like [Chenopodium quinoa]
carbohydrate metabolic process	TRINITY_DN32575_c0_g1	2.38656	up	1.73e-09	polygalacturonase-like [Chenopodium quinoa]
carbohydrate metabolic process	TRINITY_DN3973_c0_g1	1.20049	up	0.0324056	polygalacturonase At1g48100 [Spinacia oleracea]
carbohydrate metabolic process	TRINITY_DN42752_c0_g1	6.2455	up	0.0042805	PREDICTED: exopolygalacturonase-like [Beta vulgaris subsp. vulgaris]
carbohydrate metabolic process	TRINITY_DN11746_c0_g1	-1.44217	down	7.98e-08	protein IRX15-LIKE-like [Chenopodium quinoa]
carbohydrate metabolic process	TRINITY_DN1173_c1_g1	-1.16732	down	5.68e-05	Glycoside hydrolase, family 19, catalytic [Corchorus capsularis]
carbohydrate metabolic process	TRINITY_DN6520_c0_g1	2.25206	up	0.0250537	PREDICTED: chloroplast stem-loop binding protein of 41 kDa a, chloroplastic [Beta vulgaris subsp. vulgaris]
carbohydrate metabolic process	TRINITY_DN24222_c0_g1	4.07073	up	0.00908852	phosphoglucomutase [Spinacia oleracea]
carbohydrate metabolic process	TRINITY_DN56735_c0_g1	-4.14439	down	0.000354401	hypothetical protein FH972_023459 [Carpinus fangiana]
carbohydrate metabolic process	TRINITY_DN11901_c0_g1	-2.60701	down	0.0148014	hypothetical protein FH972_021544 [Carpinus fangiana]
carbohydrate metabolic process	TRINITY_DN81299_c0_g1	-6.92634	down	0.000118457	hypothetical protein EZV62_023200 [Acer yangbiense]
carbohydrate metabolic process	TRINITY_DN8041_c0_g1	2.01697	up	0.0468751	uncharacterized protein LOC110719980 isoform X2 [Chenopodium quinoa]
carbohydrate metabolic process	TRINITY_DN68760_c0_g1	-5.73403	down	0.00543453	hypothetical protein FH972_025194 [Carpinus fangiana]
carbohydrate metabolic process	TRINITY_DN40370_c0_g2	-1.57786	down	1.67e-11	hypothetical protein SOVF_173740 [Spinacia oleracea]
carbohydrate metabolic process	TRINITY_DN13033_c0_g1	-2.20923	down	0.0494707	PREDICTED: uncharacterized protein LOC109135832 [Beta vulgaris subsp. vulgaris]
carbohydrate metabolic process	TRINITY_DN9175_c0_g1	-2.61627	down	0.024684	uncharacterized protein LOC113283415 isoform X1 [Papaver somniferum]
carbohydrate metabolic process	TRINITY_DN26427_c0_g1	-1.54521	down	0.0474286	hypothetical protein FH972_022520 [Carpinus fangiana]
carbohydrate metabolic process	TRINITY_DN629_c0_g1	1.17213	up	4.63e-06	uncharacterized protein At1g04910-like [Chenopodium quinoa]
carbohydrate metabolic process	TRINITY_DN63713_c0_g1	-5.14535	down	0.0076227	hypothetical protein FH972_023192 [Carpinus fangiana]
carbohydrate metabolic process	TRINITY_DN5637_c0_g1	1.49243	up	1.5e-06	uncharacterized protein LOC110704552 [Chenopodium quinoa]
carbohydrate metabolic process	TRINITY_DN79984_c0_g1	-4.2544	down	0.00952798	hypothetical protein AXX17_ATUG04840 [Arabidopsis thaliana]
carbohydrate metabolic process	TRINITY_DN11983_c0_g1	1.25127	up	0.000600044	PREDICTED: uncharacterized protein LOC104889952 [Beta vulgaris subsp. vulgaris]

## Sheet: Table S9
Table S9. A list of primers used in this study.
Purpose	Gene ID	Primer sequences (5'-3')
RT-PCR	SlNAC2-F	AACTCCCATCCCATCACCAC
	SlNAC2-R	AGCCCAGTTCCAGCATGA
	AtACTIN2-F	CCTTGAAGTATCCTATTGAGC
	AtACTIN2-R	GGTCTTTGAGGTTTCCATCT
RT-qPCR	TRINITY_DN9523_c0_g1_qF	CATTGGGGTTCTTGGGTTTCT
	TRINITY_DN9523_c0_g1_qR	GCATTTGGGTTGTAAGGGAAG
	TRINITY_DN8056_c0_g1_qF	TAAGCGTGCTCGTTACAAGTC
	TRINITY_DN8056_c0_g1_qR	TCCTTCATCCTTTTCATCAGC
	TRINITY_DN52120_c0_g1_qF	CTGCTCCTTCTTCTGCTACC
	TRINITY_DN52120_c0_g1_qR	TCCACTTATTTTGCCACTCAG
	TRINITY_DN8430_c0_g1_qF	GTTGTCATGTCATCGCAGGT
	TRINITY_DN8430_c0_g1_qR	AGGGGTGTAAGGTTGTGACT
	TRINITY_DN10246_c0_g1_qF	ACCAACGAACTTGTCCCTCC
	TRINITY_DN10246_c0_g1_qR	ACTTGGGTTGTTTGCTGGATT
	TRINITY_DN11967_c0_g1_qF	TTGTTGGTGGTAACTCTGCTG
	TRINITY_DN11967_c0_g1_qR	CAAAGGTGGAACTGTTGCTCT
	TRINITY_DN40370_c0_g1_qF	TACTCAAGCCTATGGAACGC
	TRINITY_DN40370_c0_g1_qR	ACCCATCTTAGTCTCCTCCT
	TRINITY_DN6994_c0_g1_qF	TGCTCCATTCACTGCTTCATA
	TRINITY_DN6994_c0_g1_qR	CAACCCATTTCATCCTTCTCA
	TRINITY_DN6994_c0_g2_qF	CCATTAGGGAGCACAAGAACA
	TRINITY_DN6994_c0_g2_qR	TGTATGAAGCAGTGAACGGG
	TRINITY_DN4215_c0_g1_qF	CCAAAGAACCAACCAATGAGG
	TRINITY_DN4215_c0_g1_qR	CATCCAAGAAGACGCAGAAGT
	TRINITY_DN8701_c0_g1_qF	GTAACCCTCCTTTGAAGCACT
	TRINITY_DN8701_c0_g1_qR	GTTGAAGTAAGAATGACCGTTG
	TRINITY_DN11950_c0_g1_qF	AGCCAAGGGTACGGGACTAG
	TRINITY_DN11950_c0_g1_qR	GTTGCACCACCCACCATTGT
	TRINITY_DN16803_c0_g2_qF	TCATAGCACCATCTTCCCCT
	TRINITY_DN16803_c0_g2_qR	AACAACACCTGATTCCACCG
	TRINITY_DN4831_c0_g1_qF	TGCTGGGGTGTATGAAGAGTA
	TRINITY_DN4831_c0_g1_qR	CCGTGACAACAAAAGTAGCAG
	TRINITY_DN6856_c0_g1_qF	AAGCGTGGGTTGTGCTGTAG
	TRINITY_DN6856_c0_g1_qR	AGCATTTTCAGTTGACGAGGG
	SlACTIN_qF	ATCCCAAGGCTAATCGTGAAAA
	SlACTIN_qR	CACCATCACCAGAGTCCAACA
